1           **RUNX1 marks a luminal castration resistant lineage established**  
2                                   **at the onset of prostate development**

3  
4   **AUTHORS**

5   Renaud Mevel<sup>1</sup>, Ivana Steiner<sup>2</sup>, Susan Mason<sup>3</sup>, Laura Galbraith<sup>3</sup>, Rahima Patel<sup>1</sup>, Muhammad ZH  
6   Fadlullah<sup>1</sup>, Imran Ahmad<sup>3,4</sup>, Hing Y. Leung<sup>3,4</sup>, Pedro Oliveira<sup>5</sup>, Karen Blyth<sup>3,4</sup>, Esther Baena<sup>2,6</sup>,  
7   Georges Lacaud<sup>1,7</sup>

8  
9   **AFFILIATIONS**

10   <sup>1</sup> Cancer Research UK, Stem Cell Biology Group, Cancer Research UK Manchester Institute, The  
11   University of Manchester, Alderley Park, Alderley Edge, Macclesfield, SK10 4TG, UK.

12   <sup>2</sup> Cancer Research UK, Prostate Oncobiology Group, Cancer Research UK Manchester Institute,  
13   The University of Manchester, Alderley Park, Alderley Edge, Macclesfield, SK10 4TG, UK.

14   <sup>3</sup> Cancer Research UK Beatson Institute, Bearsden, Glasgow, G61 1BD, UK.

15   <sup>4</sup> Institute of Cancer Sciences, College of Medical, Veterinary and Life Sciences, University of  
16   Glasgow, Bearsden, Glasgow, G61 1QH, UK.

17   <sup>5</sup> Department of Pathology, The Christie NHS Foundation Trust, Manchester, UK.

18   <sup>6</sup> Belfast-Manchester Movember Centre of Excellence, Cancer Research UK Manchester  
19   Institute, The University of Manchester, Alderley Park SK10 4TG, UK.

20   <sup>7</sup> Correspondence: [georges.lacaud@manchester.ac.uk](mailto:georges.lacaud@manchester.ac.uk)

21   Phone: +44 (0) 161 446 6058, Fax: +44 (0) 161 446 3109

## 22 **ABSTRACT**

23 The development of castration-resistant prostate cancer is a major complication of androgen-  
24 deprivation therapy. However, the origin and identity of these resistant cells remains  
25 controversial. Here, we report that the transcription factor RUNX1 marks a specific  
26 subpopulation of proximal luminal cells (PLCs), enriched in the periurethral region of the  
27 developing and adult mouse prostate, and distinct from the previously identified NKX3.1<sup>+</sup>  
28 luminal castration resistant cells. Using scRNA-seq profiling and genetic lineage tracing, we  
29 show that RUNX1<sup>+</sup> PLCs are unaffected by androgen deprivation, and do not contribute to the  
30 regeneration of the distal luminal compartments. Furthermore, we demonstrate that a  
31 transcriptionally similar RUNX1<sup>+</sup> population emerges at the onset of embryonic prostate  
32 specification to populate the proximal region of the ducts. Collectively, our results reveal that  
33 RUNX1<sup>+</sup> PLCs is an intrinsic castration-resistant and self-sustained lineage that emerges early  
34 during prostate development and provide new insights into the lineage relationships of the  
35 prostate epithelium.

## 36 INTRODUCTION

37 Prostate is a glandular organ of the mammalian male reproductive system and Prostate  
38 Cancer (PCa) is the most frequently diagnosed cancer in men. One limitation in its treatment is  
39 the difficulty to accurately discriminate between indolent and more aggressive forms of the  
40 disease. Therefore, a greater understanding of PCa, as well as normal prostate biology would be  
41 transformative in improving current diagnostic and treatment modalities.

42 In mice, prostate development starts during embryogenesis at embryonic day (E) 15.5-  
43 16.5 with the emergence of the first prostatic buds from the rostral end of the urogenital sinus  
44 (UGS) (Bhatia-Gaur et al., 1999; Georgas et al., 2015; Keil et al., 2012; Toivanen & Shen, 2017).  
45 These initial buds grow into the surrounding mesenchyme to develop postnatally and through  
46 puberty into a branched ductal network organized in distinct pairs of lobes, known as the  
47 anterior prostate (AP), dorsolateral prostate (DLP) and ventral prostate (VP) (Sugimura et al.,  
48 1986a). Each lobe has distinct branching patterns, histopathological characteristics, and is  
49 thought to contribute differently to the physiological function of the prostate. The  
50 differentiated epithelium of the adult prostate gland is mainly composed of basal and luminal  
51 cells, interspersed with rare neuroendocrine cells (Shen & Abate-Shen, 2010; Toivanen & Shen,  
52 2017; Y. Wang et al., 2001). Luminal cells form a layer of polarized tall columnar cells that  
53 depend on androgen signaling and produce the prostatic secretions. Basal cells act as a  
54 supportive layer located between the luminal cells and the surrounding stroma.

55 In PCa patients, androgen deprivation therapy (ADT) is frequently used to target  
56 androgen-dependent tumor cells. However, the emergence of castration-resistant PCa cells,  
57 proposed to either originate from intrinsically castration-resistant subpopulations or to be

58 acquired *de novo*, is a major limitation of this treatment (Shen & Abate-Shen, 2010; Zhang et  
59 al., 2018). Therefore, understanding the origin and identity of these resistant cells both in the  
60 normal prostate and PCa represents an essential step towards improving PCa treatments. In  
61 mice, surgical castration-induced prostate involution has proven an invaluable tool to identify  
62 progenitor castration-resistant cell populations, characterized by their ability to survive in the  
63 absence of androgens, and to fully regenerate an intact adult prostate after re-administration  
64 of testosterone (Barros-Silva et al., 2018; Kwon et al., 2016; McAuley et al., 2019; Tsujimura et  
65 al., 2002; B. Wang et al., 2015; X. Wang et al., 2009; Yoo et al., 2016). Indeed, despite being  
66 mostly quiescent under homeostatic conditions, the prostate gland encompasses incredible  
67 plasticity. Such plasticity has also been shown in defined experimental conditions to stimulate  
68 regenerative properties of epithelial subpopulations, including transplantations (Barros-Silva et  
69 al., 2018; Burger et al., 2005; Lawson et al., 2007; Lukacs et al., 2010; Richardson et al., 2004; X.  
70 Wang et al., 2009; Xin et al., 2005; Yoo et al., 2016), injury repair (Horton et al., 2019; Kwon et  
71 al., 2014; Toivanen et al., 2016), and organoid assays (Chua et al., 2014; Höfner et al., 2015;  
72 Karthaus et al., 2014). In addition, several studies have proposed that progenitor populations  
73 with distinct physiological roles and regenerative capacity reside at different locations within  
74 the prostate (Burger et al., 2005; Crowell et al., 2019; Goldstein et al., 2008; Goto et al., 2006;  
75 Kwon et al., 2016; Leong et al., 2008; McNeal, 1981; Tsujimura et al., 2002). However, the  
76 precise cellular hierarchy and how it is established during development remains controversial.

77         RUNX transcription factors (TF) are master regulators of lineage commitment and cell  
78 fate (Mevel et al., 2019). In particular, RUNX1 is essential for the ontogeny of the hematopoietic  
79 system and alterations of RUNX1 have been associated with a broad spectrum of hematological



80 malignancies. Interestingly, increasing evidence implicates RUNX1 in the biology and pathology  
81 of hormone-associated epithelia (Lie-A-Ling et al., 2020; Riggio & Blyth, 2017; Scheitz &  
82 Tumber, 2013), including breast (Browne et al., 2015; Chimgé et al., 2016; Ferrari et al., 2014;  
83 van Bragt et al., 2014), uterine (Planagumà et al., 2004, 2006), ovarian (Keita et al., 2013), and  
84 prostate cancers (Banach-Petrosky et al., 2007; Scheitz et al., 2012; Takayama et al., 2015).  
85 Despite the documented importance of RUNX TFs and reports of RUNX1 in PCa, its expression  
86 in the normal prostate gland during development, homeostasis, and regeneration has not been  
87 explored.

88         In this study, we found that *Runx1* marks a discrete subset of luminal cells located in the  
89 proximal region of the prostatic ducts. Using mouse models, combined with lobe-specific single-  
90 cell transcriptomic profiling of adult, castrated, and developing prostates, we show that RUNX1<sup>+</sup>  
91 proximal luminal cells represent a distinct lineage established at the onset of prostate  
92 development, displaying intrinsic castration-resistant and self-sustaining properties.

## 93 RESULTS

### 94 RUNX1 marks a subpopulation of prostate proximal luminal cells (PLCs)

95 We initially sought to characterize the expression pattern of *Runx1* in adult mouse  
96 prostate. While RUNX1 was detected in basal cells at multiple spatial locations, its expression  
97 was specifically high in a subset of luminal cells found in the proximal region of all three lobes,  
98 also known as periurethral (Figures 1A, B; Figure 1–figure supplement 1A, B). Sections were co-  
99 stained with NKX3.1, a master regulator of prostate development broadly expressed in luminal  
100 cells. Using quantitative image-based cytometry (QBIC), we found that RUNX1 and NKX3.1 had  
101 a largely mutually exclusive expression pattern, with a sharp transition from RUNX1<sup>+</sup> NKX3.1<sup>-</sup> to  
102 RUNX1<sup>-</sup> NKX3.1<sup>+</sup> cells in the proximal region (Figures 1A, B; Figure 1–figure supplement 1A, B).  
103 These proximal luminal cells had a unique histological profile, with a compact organization,  
104 intense nuclear hematoxylin staining, and increased nuclear-to-cytoplasmic ratio (Figure 1–  
105 figure supplement 1C). In contrast, distal luminal cells had a large cytoplasm with intense pink  
106 eosin staining, likely reflecting their secretory function. These observations suggest that RUNX1  
107 marks a subset of proximal luminal cells, distinct from the abundant NKX3.1<sup>+</sup> luminal population  
108 lining the rest of the prostate epithelium.

109 The proximal site of the prostate has been proposed to be enriched in cells with  
110 stem/progenitor properties (Goldstein et al., 2008; Kwon et al., 2016; Tsujimura et al., 2002;  
111 Yoo et al., 2016). In order to study the regenerative potential of *Runx1* expressing cells *ex vivo*,  
112 we took advantage of isoform-specific fluorescent reporter mouse models of *Runx1* (Draper et  
113 al., 2018; Sroczynska et al., 2009). *Runx1* expression is controlled by two promoters, P1 and P2,  
114 that respectively drive the expression of the *Runx1c* and the *Runx1b* isoform (Mével et al.,

115 2019). We found that *Runx1* expression in the prostate was exclusively mediated by the  
116 proximal P2 promoter, in up to 30% of all epithelial EPCAM<sup>+</sup> prostate cells (Figures 2A-C). Flow-  
117 cytometry profiling confirmed the enrichment of P2-*Runx1*:RFP in both basal (EPCAM<sup>+</sup>  
118 CD49<sup>high</sup>) and luminal (EPCAM<sup>+</sup> CD24<sup>high</sup>) lineages of the proximal compared to the distal  
119 prostate (Figures 1C, D; Figure 1–figure supplement 2D). Mirroring our QBIC spatial analysis  
120 (Figure 1–figure supplement 1B), P2-*Runx1*:RFP was also detected in a large fraction of the VP  
121 epithelium (Figure 1–figure supplement 2D).

122 We therefore used the P2-*Runx1*:RFP mouse line to isolate *Runx1* positive (RFP<sup>+</sup>) and  
123 negative (RFP<sup>-</sup>) epithelial cells from the basal and luminal compartments of all three prostate  
124 lobes and evaluated their regenerative potential in organoid culture assays (Drost et al., 2016)  
125 (Figure 1E). The proximal and distal regions of the AP were analysed separately. Proximal RFP<sup>+</sup>  
126 luminal cells of the AP consistently displayed higher Organoid Formation Capacity (OFC) than  
127 the RFP<sup>-</sup> fraction (Figure 1F). Luminal RFP<sup>+</sup> sorted cells of the DLP and VP also had a greater OFC  
128 than RFP<sup>-</sup> cells (Figure 1–figure supplement 3A). In contrast, no significant differences in OFC  
129 were observed between basal enriched subsets and distal luminal RFP<sup>+</sup> and RFP<sup>-</sup> cells.  
130 Brightfield assessment revealed that virtually all organoids had a ‘solid’ aspect, except for the  
131 predominantly ‘hollow’ organoids derived from proximal RFP<sup>+</sup> luminal cells (Figure 1–figure  
132 supplement 3B). To further characterize their lineage potential, we classified organoids into  
133 three types based on the expression of specific lineage markers: unipotent “basal-like” Keratin  
134 5<sup>+</sup> (K5<sup>+</sup>), unipotent “luminal-like” Keratin 8<sup>+</sup> (K8<sup>+</sup>), or multipotent K5<sup>+</sup> K8<sup>+</sup> (Figures 1G, H; Figure  
135 1–figure supplement 3C). Interestingly, AP proximal luminal RFP<sup>+</sup> derived organoids were  
136 predominantly small unipotent K8<sup>+</sup>, while the remainder fraction mainly gave larger unipotent

137 K5<sup>+</sup> organoids (Figures 1H; Figure 1–figure supplement 3D). Few multipotent K5<sup>+</sup> K8<sup>+</sup> organoids  
138 were also identified in nearly all populations.

139 Together, our results show that RUNX1 marks a specific subset of proximal luminal cells  
140 (PLCs), and that its expression in the prostate is mediated by the P2 promoter. RUNX1<sup>+</sup> PLCs  
141 have a particular predisposition to form unipotent K8<sup>+</sup> hollow organoids, suggesting a lineage  
142 bias towards the luminal identity, and highlighting differences within the luminal compartment  
143 of proximal and distal regions.

144

#### 145 ***Runx1* expressing cells are enriched in the castrated prostate epithelium**

146 In mice, androgen-deprivation can be modelled by surgical castration which leads to  
147 prostate regression and enriches for castration-resistant cells (Toivanen & Shen, 2017; Zhang et  
148 al., 2018). This process is accompanied by the death of luminal androgen-dependent cells and a  
149 small proportion of basal cells (English et al., 1987; Sugimura et al., 1986b). To track changes in  
150 *Runx1* expression following androgen withdrawal, we surgically castrated P2-*Runx1*:RFP mice  
151 and harvested tissue  $\geq$  4 weeks post-surgery (Figure 2A). While intact prostates contained  $22.8$   
152  $\pm 6.0\%$  RFP<sup>+</sup> epithelial cells, their frequency increased to  $87 \pm 6.0\%$  following castration (Figures  
153 2B, C). High RUNX1 levels were no longer restricted to the proximal region, and RFP was  
154 detected in virtually all basal cells of the AP, DLP and VP, as well as more than 75% of the  
155 luminal castration-resistant cells (Figures 2D; Figure 2–figure supplement 4A). RUNX1  
156 expressing cells often co-expressed TROP2 (Figure 2E), known to be widely expressed in  
157 castrated prostate epithelium (Goldstein et al., 2008; X.-D. Wang et al., 2007). Several  
158 castration-resistant luminal populations have been identified in mice (Barros-Silva et al., 2018;

159 Kwon et al., 2016; McAuley et al., 2019; Tsujimura et al., 2002; B. Wang et al., 2015; X. Wang et  
160 al., 2009; Yoo et al., 2016), including rare castration-resistant *Nkx3-1* expressing cells (CARNs).  
161 Accordingly, we observed low, but detectable, levels of NKX3.1 in some luminal cells, but only  
162 occasional RUNX1<sup>+</sup> NKX3.1<sup>+</sup> luminal cells in the distal regions of the castrated prostate (Figures  
163 2D; Figure 2—figure supplement 4B, C). Importantly, the clear transition from RUNX1<sup>+</sup> to  
164 NKX3.1<sup>+</sup> cells identified in the proximal luminal layer of intact mice was conserved after  
165 castration (Figure 2D, ii).

166 Together, these results show that RUNX1 is expressed in the majority of the castration-  
167 resistant cells. The RUNX1<sup>+</sup> NKX3.1<sup>-</sup> subset identified in the proximal luminal epithelium of the  
168 intact prostate remain NKX3.1<sup>-</sup> following castration, supporting the notion that RUNX1<sup>+</sup> PLCs  
169 constitute a distinct lineage from distal NKX3.1<sup>+</sup> cells.

170

## 171 **scRNA-seq profiling of *Runx1*<sup>+</sup> and *Runx1*<sup>-</sup> cells in individual lobes of the intact and castrated** 172 **prostate**

173 To further characterize the RUNX1<sup>+</sup> and RUNX1<sup>-</sup> fractions residing at different  
174 anatomical locations of the prostate, we performed droplet-based single cell (sc)RNA-seq. We  
175 sorted EPCAM<sup>+</sup> RFP<sup>+</sup> and RFP<sup>-</sup> cells from individually dissected lobes of intact and castrated  
176 prostates isolated from P2-*Runx1*:RFP reporter mice (Figure 3A). Sorted populations were  
177 multiplexed using MULTI-seq lipid-tagged indices to minimize technical confounders such as  
178 doublets and batch effects (McGinnis, Patterson, et al., 2019). We retrieved a total of 3,825  
179 prostate epithelial cells from all sorted populations, with a median of 2,846 genes per cell (see  
180 Methods; Figure 3—figure supplement 5, 6A-G). We identified 9 *in silico* computed clusters

181 expressing canonical epithelial, basal, and luminal markers (Figure 3–figure supplement 6H-J). A  
182 large population of basal cells was annotated by merging 3 tightly connected subclusters  
183 broadly expressing *Krt5*, *Krt14*, and *Trp63* (Figures 3B-D; Figure 3–figure supplement 6E, J).  
184 Luminal populations expressed surprisingly heterogeneous levels of canonical luminal markers  
185 such as *Cd26/Dpp4*, *Cd24a*, *Krt8*, and *Krt18* (Figure 3–figure supplement 6I). We annotated  
186 those distinct clusters as Luminal-A (Lum-A), Lum-B, Lum-C, Lum-D, Lum-E and Lum-F (Figure  
187 3B). Differential gene expression analysis revealed genes strongly associated with each luminal  
188 subpopulation (Figures 3C, 3D; Figure 3–figure supplement 7A; Supplementary file 2).

189         Initially, we sought to evaluate the effect of androgen withdrawal on lobe-specific  
190 cellular heterogeneity. Lum-A/B/C/D were largely enriched in luminal cells originating from  
191 intact prostates, whereas Lum-E/F contained mainly castrated luminal cells (Figures 3E; Figure  
192 3–figure supplement 7B). However, a small fraction of intact cells was also identified in Lum-  
193 E/F, while some castrated cells were found in Lum-A/B/C/D clusters. Interestingly, Lum-A/C/F  
194 mainly contained VP cells, while Lum-B/D/E had a majority of AP and DLP cells, indicating that  
195 the lobular identity of luminal cells in the intact prostate is conserved following castration  
196 (Figures 3F; Figure 3–figure supplement 7C). This suggests that a subset of intact Lum-A/C  
197 undergoes partial reprogramming during castration-induced regression and gives rise to the  
198 Lum-F cluster. Similarly, surviving Lum-B/D may predominantly reprogram into Lum-E cells  
199 upon castration. In contrast, castrated basal cells were minimally affected by androgen-  
200 deprivation and clustered together with intact basal cells (Figure 3E). Overall, our dataset  
201 highlights the broad transcriptional reprogramming occurring predominantly in luminal cells  
202 upon androgen deprivation.

203

204 ***Runx1* expressing luminal cells are transcriptionally similar to castration-resistant cells**

205 We next specifically focused our attention on RUNX1<sup>+</sup> luminal cells. The Lum-D cluster  
206 predominantly consisted of AP derived RFP<sup>+</sup> cells, as well as a small number of RFP<sup>+</sup> DLP and VP  
207 cells (Figure 3F, H; Figure 3–figure supplements 6E, 7B, 7C). High *Runx1* expression in Lum-D  
208 correlated with higher levels of *Tacstd2/Trop2*, Ly6 family members as well as *Runx2* (Figures  
209 3D, G; Figure 3–figure supplements 7D, E). In contrast, *Runx1* was barely detected in clusters  
210 Lum-B/C which expressed high levels of *Nkx3-1* while Lum-A cells expressed low levels of both  
211 *Runx1* and *Nkx3-1*. These results suggest that the Lum-D cluster corresponds to the distinct  
212 RUNX1<sup>+</sup> luminal cells identified in the proximal region of all three prostate lobes (Figure 1).

213 To further characterize the specificities of those populations, we performed gene  
214 ontology analysis. In line with the secretory role of distal luminal cells, clusters Lum-A/B/C were  
215 enriched in enzymatic activity and protein synthesis functions. In contrast, the Lum-D cluster  
216 was enriched in terms related to epithelial developmental processes, similar to Lum-E/F (Figure  
217 3–figure supplements 8A-I). This was supported by partition-based graph abstraction (Wolf et  
218 al., 2019), which uncovered a strong degree of connectivity between the mainly intact Lum-D  
219 and castrated Lum-E population (Figure 3B). Additionally, the Lum-D cluster contained a small,  
220 but defined, subpopulation of castrated epithelial cells, suggesting the preservation of its  
221 identity upon androgen deprivation (Figures 3E, F). In this population, we found very few genes  
222 significantly differentially expressed between intact and castrated cells (n=103; Supplementary  
223 file 3). As expected, androgen-regulated genes including *Psca* and *Tspan1* were downregulated  
224 in the castrated subset, while strong contributors of the Lum-D identity such as *Tacstd2/Trop2*,

225 *Krt4* and *Runx1* did not vary (Figure 3–figure supplement 8J). These observations further  
226 support the hypothesis that Lum-D/*RUNX1*<sup>+</sup> PLCs maintain their identity following androgen-  
227 deprivation.

228 Overall, our single-cell transcriptomic analysis highlighted a vast degree of  
229 heterogeneity within and between the luminal compartments of both intact and castrated  
230 mouse prostates. The tight transcriptional relationship observed between high *Runx1*  
231 expressing clusters Lum-D and Lum-E/F suggest that the Lum-D population, which corresponds  
232 to PLCs, may contain intrinsically castration-resistant luminal cells

233

### 234 **Lineage-tracing of *Runx1* expressing cells establishes the intrinsic castration resistant** 235 **properties of the proximal luminal lineage**

236 To determine if *RUNX1*<sup>+</sup> PLCs were enriched in castration-resistant cells, we combined  
237 prostate regression-regeneration assays with genetic lineage-tracing using *Runx1*<sup>mER-CRE-</sup>  
238 <sup>mER</sup>*Rosa*<sup>Flox-stop-Flox-RFP</sup> mice (Luche et al., 2007; Samokhvalov et al., 2007), henceforth *Runx1*<sup>CRE-</sup>  
239 <sup>stop-RFP</sup> (Figure 4A). Using this model, we could genetically label an average of  $4.70 \pm 2.8\%$   
240 prostate epithelial *Runx1* expressing cells with RFP upon tamoxifen injection (Figures 4B, C;  
241 Figure 4–figure supplement 9A). This corresponded to  $0.54 \pm 0.2\%$  of the total epithelium  
242 (Figure 4E). Consistent with the expression pattern of *Runx1*, the majority of labelled cells were  
243 located in the proximal region of the prostate (Figure 4C), and co-expressed Keratin 4 (K4)  
244 (Figure 4–figure supplements 9D, E), previously found enriched in Lum-D cells (Figure 3D).

245 Following surgical castration, we found that the absolute number of RFP<sup>+</sup> marked cells  
246 remained stable (Figure 4–figure supplements 9C, D). However, the frequency of RFP<sup>+</sup> cells in



247 the epithelial compartment increased by  $\sim 4.3$  fold (Figures 4E; Figure 4–figure supplement 9B)  
248 indicating that *Runx1* expressing cells have an enhanced capacity to survive castration  
249 compared to *Runx1* negative cells. Next, we investigated whether these intrinsically castration-  
250 resistant *Runx1* expressing cells were involved in epithelial regeneration upon testosterone  
251 addback (Figure 4B, bottom). Surprisingly, only  $0.71 \pm 0.2\%$  RFP<sup>+</sup> epithelial cells were found in  
252 the regenerated prostate, which was comparable to the intact state (Figures 4E; Figure 4–figure  
253 supplements 9B-D). Although the majority of RFP<sup>+</sup> clones consisted of single cells, we did  
254 observe a minor  $\sim 2$ -fold increase in the frequency of larger clones (2-4 cells) after regeneration,  
255 highlighting a modest contribution of RFP labeled cells during prostate regeneration (Figures 4F,  
256 G). We found that most RFP marked cells were luminal K8<sup>+</sup> in intact, castrated, and regenerated  
257 prostates (Figures 4F, H), with only a few basal K5<sup>+</sup> RFP<sup>+</sup> cells detected in distal areas (Figure  
258 4F). Strikingly, more than 90% of all RFP<sup>+</sup> cells remained negative for NKX3.1 in all experimental  
259 arms (Figure 4I).

260 Thus, these results indicate that RFP<sup>+</sup> cells, including PLCs, are mostly unaffected by  
261 fluctuations in androgen levels during regression-regeneration assays. RUNX1 expression marks  
262 intrinsically castration-resistant luminal cells that do not contribute to the expansion of luminal  
263 NKX3.1<sup>+</sup> cells during prostate regeneration.

264

### 265 ***Runx1* marks proximal cells during prostate development**

266 Given the singular identity of proximal luminal *Runx1* expressing cells in the adult  
267 prostate, we then asked if this luminal lineage was already emerging during prostate  
268 development. At E18.5, once the first prostate buds have emerged, RUNX1 was mainly found in

269 the K8<sup>high</sup> inner layers of the stratified urogenital epithelium (UGE) (Figure 5A). Interestingly,  
270 these cells also co-expressed K4 (Figure 5–figure supplement 10A), previously found in the Lum  
271 D population (Figure 3D), as well as LY6D, recently shown to mark a subset of adult luminal  
272 progenitors (Barros-Silva et al., 2018) (Figure 5–figure supplement 10B). In contrast, RUNX1  
273 expression was low in p63<sup>+</sup> and K5<sup>+</sup> cells, either lining the outer UGE or found in the tips of  
274 premature NKX3.1<sup>+</sup> prostate buds (Figures 5A-C). At postnatal day 14 (P14), a prepubescent  
275 stage when most of the initial branching events have already occurred (Sugimura et al., 1986a;  
276 Tika et al., 2019), RUNX1 was broadly expressed in the proximal region (Figure 5D), mainly in  
277 K4<sup>+</sup> luminal cells and in some K5<sup>+</sup> or p63<sup>+</sup> cells (Figure 5–figure supplement 10C-E). Conversely,  
278 NKX3.1<sup>+</sup> cells were found in distal locations, largely distinct from RUNX1<sup>+</sup> cells. The specific  
279 spatial expression pattern of RUNX1 in proximal luminal cells, largely mutually exclusive with  
280 NKX3.1, suggests that these two transcription factors already mark distinct cellular lineages  
281 during embryonic prostate organogenesis.

282 To study the dynamic emergence of RUNX1<sup>+</sup> cells during prostate development, we  
283 utilized an explant culture system (Berman et al., 2004; Doles et al., 2005; Kruithof-de Julio et  
284 al., 2013; Lopes et al., 1996). Dissected E15.5 UGS were cultured for up to 7 days in the  
285 presence of dihydrotestosterone (Figures 5E, F). Bud formation was initiated within 2 days of  
286 culture (Figure 5G) and composed of a double positive K5<sup>+</sup> K8<sup>+</sup> stratified epithelium, partially  
287 diversifying by day 7 (Figure 5–figure supplement 11A, B). On day 0 (E15.5), RUNX1 was  
288 detected at the rostral end of the UGE, particularly within the inner layers of the stratified  
289 epithelium. After 1 day in culture, NKX3.1 expression emerged in RUNX1<sup>+</sup> cells located in the  
290 outer layers of the UGE, while defined budding was yet to be observed. On day 2, NKX3.1<sup>+</sup>

291 prostate buds were evident and had reduced or absent RUNX1 expression. This pattern was  
292 conserved in the mature explant, in which distal tips were mainly NKX3.1<sup>+</sup>, whereas the  
293 proximal area remained RUNX1<sup>+</sup> (Figures 5G, H), and co-expressed LY6D and K4 (Figure 5—figure  
294 supplements 10C, D). Cellular proliferation marked by Ki67 was more substantial in distal  
295 regions, suggesting that most of the expansion did not take place in the RUNX1<sup>+</sup> compartment  
296 (Figure 5—figure supplement 10E).

297         These results suggest that prostate budding originates from a subset of cells located in  
298 the outer layers of the stratified UGE, transiently marked by RUNX1 and NKX3.1. During  
299 embryonic prostate development, *Runx1* expression is already primarily confined to the  
300 proximal region of the prostatic ducts, in a distinct compartment from NKX3.1<sup>+</sup> cells.

301

### 302 **scRNA-seq of explant cultures reveals the specification of the proximal luminal lineage during** 303 **embryonic prostate development**

304         The characterization by immunostainings of continuous developmental processes is  
305 generally constrained to a small number of markers at a time. To further study the specification  
306 of RUNX1 and NKX3.1 lineages, we performed scRNA-seq on UGS explant cultures collected at  
307 successive time points: E15.5 (D0), day 1 (D1), day 3 (D3), and day 6 (D6) (Figure 6A). After data  
308 processing, 3,937 developing prostatic cells were retained, with a median of 3,608 genes per  
309 cell (see Methods; Figure 6—figure supplement 12).

310         Visualization of the dataset using a force-directed layout highlighted the progressive  
311 cellular diversification taking place from D0 to D6 (Figure 6B). Cellular populations were divided  
312 into 9 clusters, annotated C0 to C8 (Figures 6C-E). C0/C1 contained the majority of D0 and D1

313 derived cells, while C2-C8 emerged and expanded at later time points. Due to the primitive  
314 nature of the UGE at these time points, the classical basal and luminal lineages were not fully  
315 established yet (Figures 6F; Figure 6—figure supplements 13A-E; Supplementary file 4).  
316 Nevertheless, C4-C6 had a more pronounced ‘basal’ identity compared to the other clusters.  
317 *Krt5/Krt14* marked mainly C4, and additional basal markers including *Trp63*, *Dcn*, *ApoE*, or *Vcan*  
318 were higher in C5/C6. Overall, known regulators of prostate development (Toivanen & Shen,  
319 2017) displayed a variable expression pattern across the different clusters. For example, *Foxa1*  
320 and *Shh* were strongly expressed in C0/C1, *Notch1* was higher in C3, and *Sox9* in C7 (Figure 6—  
321 figure supplement 13C), highlighting the potential of this dataset to interrogate specific  
322 features of prostate development.

323 Consistent with our previous results, *Runx1* was highly expressed in clusters having  
324 lower *Nkx3-1* levels, including C0, C1, C2 and C4 (Figure 6G). To determine how these clusters  
325 relate to differentiated prostate lineages, we interrogated population-specific gene signatures  
326 previously identified in the adult (Figure 3). The ‘Basal’ signature was enriched across all  
327 clusters, especially in C4/C6 (Figures 6I; Figure 6—figure supplement 13F, G). Strikingly, the  
328 ‘Lum-D’ derived signature was highly enriched in C2 compared to all the other adult luminal  
329 population signatures, suggesting that the ‘Lum-D’ fate is determined early during prostate  
330 development. The singular identity of C2 was characterized by genes previously found highly  
331 expressed in the adult ‘Lum-D’ population, including *Tacstd2/Trop2*, *Krt4*, *PscA*, as well as *Ly6d*  
332 and *Nupr1* (Figure 6H; Figure 6—figure supplement 13A).

333 Collectively, our scRNA-seq analysis show that adult ‘Lum-D’/PLCs share strong  
334 similarities with the unique C2 population identified in embryonic explant cultures. This

335 suggests that the distinct proximal luminal lineage is established at the very onset of prostate  
336 specification.

337

338 **RUNX1<sup>+</sup> cells contribute to the establishment of the proximal luminal lineage during**  
339 **embryonic prostate development**

340 To trace the fate of RUNX1<sup>+</sup> cells during embryonic prostate specification, we cultured  
341 UGS explants isolated from the *Runx1*<sup>CRE-stop-RFP</sup> lineage tracing model. We performed 2 pulses  
342 of tamoxifen treatment on day 0 and 1 of culture and analyzed the explants on day 2 and day 7  
343 (Figure 7A). The majority of the RFP labeled cells were in the most proximal RUNX1<sup>+</sup> subset and  
344 rarely found in the distal area of the branches, where RUNX1<sup>-</sup> cells reside (Figures 7B, C).  
345 Accordingly, the proportion of RFP<sup>+</sup> RUNX1<sup>+</sup> cells remained stable between day 2 and 7 (Figure  
346 7D). Also, the fraction of RFP<sup>+</sup> cells co-expressing p63 remained unchanged throughout the  
347 culture (Figure 7–figure supplements 14A-C), while a small fraction diversified into either K5<sup>+</sup> or  
348 K8<sup>+</sup> cells (Figure 7–figure supplements 14D, E). The scattered RFP<sup>+</sup> RUNX1<sup>-</sup> cells detected in  
349 distal branches by day 7 often co-expressed NKX3.1 (Figures 7E, F). Overall, this indicates that  
350 *Runx1* expressing cells only marginally contribute to the expansion of the NKX3.1 compartment  
351 (Figure 7G). Finally, we wondered whether RUNX1<sup>+</sup> cells contributed to the establishment of  
352 the proximal luminal lineage. We evaluated the proportion of RFP labelled cells co-expressing  
353 K4, previously identified as a marker of the developing C2 and adult Lum-D populations (Figures  
354 3D and 6H). Interestingly, the fraction of K4<sup>+</sup> RFP labeled cells increased from 56.9 ± 10.6% to  
355 74.1 ± 3.0% between day 2 and 7 (Figures 7F, G). There was also an increase of RFP<sup>+</sup> cells  
356 expressing *Nupr1*, another marker of the C2 cluster (Figure 7–figure supplements 14F-H). Taken

357 together, these results show that only a small subset of *Runx1* expressing cells contributes to  
358 the expansion of NKX3.1<sup>+</sup> lineage, found in the distal region of the developing prostatic buds.  
359 Instead, the majority of *Runx1* expressing cells preferentially remain in the proximal region of  
360 the premature buds, where the proximal luminal lineage is established.

## 361 **DISCUSSION**

362           In this study, we identified RUNX1 as a new marker of a luminal population enriched in  
363 the proximal region of the prostatic ducts. By combining scRNA-seq profiling and genetic  
364 lineage tracing of *Runx1* expressing cells, we show that RUNX1<sup>+</sup> PLCs present in the intact  
365 prostate constitute a developmentally distinct and intrinsically castration-resistant luminal  
366 lineage. We propose that proximal and distal lineages are separate luminal entities from the  
367 earliest stages of prostate development. As such, our study provides novel insights into the  
368 cellular composition and developmental hierarchy of the mouse prostate epithelium.

369  
370           Until the recent advances in single-cell technologies, the prostate epithelial hierarchy  
371 was mainly defined based on anatomical features of the basal and luminal layers, their  
372 histological characteristics and the expression of a small subset of markers (Shen & Abate-Shen,  
373 2010; Toivanen & Shen, 2017). Here we present two comprehensive scRNA-seq dataset  
374 covering both the adult and the developing prostate. To our knowledge, this constitutes the  
375 first comprehensive single-cell atlas covering both intact and castrated adult mouse prostates,  
376 annotated by their lobe of origin. These datasets can be browsed interactively at  
377 <http://shiny.cruk.manchester.ac.uk/pscapp/>. In particular, our adult scRNA-seq dataset  
378 highlighted an extensive degree of cellular heterogeneity, in particular within the luminal  
379 epithelia. Several studies recently made similar observations either focusing on the AP  
380 (Karthaus et al., 2020), or the intact prostate (Crowley et al., 2020; Joseph et al., 2020).  
381 Integration of these multiple datasets will provide a more global view of the transcriptional  
382 landscape of the prostate epithelium.

383           Although mainly known as a master regulator of hematopoiesis, RUNX1 is increasingly  
384 implicated in hormone-associated epithelia including malignant conditions such as prostate  
385 cancer (Banach-Petrosky et al., 2007; Lie-A-Ling et al., 2020; Scheitz et al., 2012; Takayama et  
386 al., 2015). Here, we identified a subset of RUNX1<sup>+</sup> luminal cells located in the proximal region of  
387 the developing and adult prostate, referred to as RUNX1<sup>+</sup> PLCs, and corresponding to the Lum-D  
388 cluster identified in our adult scRNA-seq dataset. Of note, this subset appears to be the  
389 equivalent of the ‘L2’ (Karthaus et al., 2020) or ‘Lump’ (Crowley et al., 2020) clusters identified  
390 in recent studies. We demonstrate that these RUNX1<sup>+</sup> PLCs exhibit a greater organoid forming  
391 potential compared to the remaining luminal fraction, consistent with previous reports isolating  
392 similar proximal populations using different markers such as SCA-1, TROP2 or CD26 (Crowley et  
393 al., 2020; Goldstein et al., 2008; Karthaus et al., 2020; Kwon et al., 2016). Furthermore, RUNX1<sup>+</sup>  
394 PLCs predominantly formed unipotent K8<sup>+</sup> hollow organoids demonstrating their preferential  
395 commitment to the luminal fate. The greater clonogenicity of RUNX1<sup>+</sup> PLCs may in fact be  
396 linked to the gene expression profile of the corresponding Lum-D population, suggesting a  
397 more immature epithelial state, committed to the luminal lineage but not the secretory  
398 function of the prostate. It is therefore tempting to speculate that these cells act as a latent  
399 niche of ‘facultative’ stem cells (Clevers & Watt, 2018), primed to generate a structured  
400 prostatic epithelium under defined conditions.

401           Further characterization of RUNX1 expression in prostate development revealed a  
402 consistent expression pattern with the adult. RUNX1<sup>+</sup> luminal cells were restricted to the most  
403 proximal region of the developing prostate buds, both in embryos and UGS explant cultures.  
404 Our scRNA-seq of the developing prostate revealed a broad basal identity, supporting the



405 presence of multipotent basal progenitors during embryonic development (Ousset et al., 2012;  
406 Pignon et al., 2013), switching to unipotency postnatally (Tika et al., 2019). However, we  
407 observed a distinct cluster (C2) that strongly resembled the adult Lum-D population, suggesting  
408 an early branching event towards the proximal luminal fate at the onset of prostate  
409 development. Subsequent lineage tracing experiments indicated that *Runx1* expressing cells  
410 preferentially populate the emerging proximal luminal identity. It would be interesting to  
411 determine if the adult Lum-A, Lum-B, and Lum-C derive from multipotent-basal progenitors or  
412 from any specific clusters identified in the developing prostate. This appears to be the case at  
413 least for the adult Lum-D/RUNX1<sup>+</sup> PLCs which already emerges during embryonic specification.

414 Our data also sheds a light on the regenerative potential of specific epithelial  
415 populations. Basal and luminal lineages have previously been shown to be largely self-sustained  
416 using generic basal and luminal *Cre* drivers (Choi et al., 2012; Ousset et al., 2012). However,  
417 whether distinct subpopulations of luminal cells contribute to the regeneration of the others  
418 remains poorly understood (X. Wang et al., 2009; Yoo et al., 2016). Our characterization of  
419 RUNX1<sup>+</sup> PLCs and the detection of a wide variety of luminal populations in our adult prostate  
420 scRNA-seq data highlights the possible existence of multiple self-contained luminal populations.  
421 Indeed, *Runx1* driven genetic tracing experiments in regression-regeneration assays revealed  
422 that RUNX1<sup>+</sup> PLCs did not contribute to the regeneration of distal NKX3.1<sup>+</sup> cells. It was however  
423 evident that RUNX1<sup>+</sup> PLCs are intrinsically castration resistant and capable of sustaining their  
424 own lineage in the regenerated prostate. Recently, it was proposed that prostate epithelial  
425 regeneration is driven by almost all luminal cells persisting in castrated prostates (Karthaus et  
426 al., 2020). Our results are compatible with this model, but we further demonstrate that not all

427 luminal subsets retain the same *in vivo* regenerative potential in response to androgen  
428 stimulation. Thus, we suggest that the model of self-sustained basal and luminal populations  
429 might be extended to individual luminal subpopulations. This hypothesis should be tested in the  
430 future using a more specific Lum-D *Cre* driver (e.g. *Krt4/Psca*). It will also be of interest to  
431 investigate the self-sustenance of other luminal compartments using Lum-A, Lum-B and Lum-C  
432 specific *Cre* drivers.

433

434         In light of the extensive contribution of RUNX transcription factors to developmental  
435 processes (Mével et al., 2019), our study suggests a possible functional role for *Runx1* in specific  
436 lineages of the prostate epithelium, in particular in PLCs. Also, the broad expression of *Runx1*  
437 after castration suggest that it may be a valuable marker of castration-resistant cells. Functional  
438 links between RUNX factors and hormones, including AR have been previously reported  
439 (Chimge et al., 2016; Lie-A-Ling et al., 2020; Little et al., 2014; Riggio & Blyth, 2017; Takayama et  
440 al., 2015; van Bragt et al., 2014) and warrants further investigations. Along these lines, there  
441 seem to be an intriguing parallel between the low or absent expression of *Runx1* in prostate  
442 secretory cells with the documented downregulation of *Runx1* in secretory alveolar cells of the  
443 mammary gland epithelium (van Bragt et al., 2014). Overall, our results suggest that *Runx1*, but  
444 also *Runx2*, may be functionally involved in the development and maintenance of specific  
445 subpopulations of the prostate epithelium. It would now be of particular interest to further  
446 study the contribution of RUNX1 to prostate tumorigenesis. In light of the prognostic value of  
447 RUNX1 in triple-negative breast cancer (Ferrari et al., 2014), it would also be important to  
448 evaluate its biomarker potential in clinical cohorts of PCa samples.

449

450           In conclusion, we characterized the expression pattern of *Runx1* in the developing,  
451 normal and castrated mouse prostate. We observed that *Runx1* marks proximal luminal cells,  
452 which is a distinct luminal lineage emerging early during prostate specification, displaying  
453 intrinsic castration-resistant and self-sustaining properties. Our results therefore reveal strong  
454 intrinsic lineage differences within the luminal compartment. The emerging C2/Lum-D  
455 population retains a more embryonic-like program which could relate to their intrinsic  
456 castration-resistant potential and have broader relevance to cancer treatment. These results  
457 warrant future investigation of this luminal subset in the context of cancer development, tumor  
458 aggressiveness and treatment responses.

## 459 MATERIALS AND METHODS

### 460 Animal work

461 Animal experiments were approved by the Animal Welfare and Ethics Review Body  
462 (AWERB) of the Cancer Research UK Manchester Institute and conducted according to the UK  
463 Home Office Project Licence (PPL 70/8580). Genetic lineage-tracing experiments were  
464 performed at the Beatson Biological Services Unit (PPL 70/8645 & P5EE22AEE) and approved by  
465 the University of Glasgow AWERB. Mice were maintained in purpose-built facility in a 12-hour  
466 light/dark cycle with continual access to food and water.

467  
468 Immunocompetent wild-type ICR (CD-1) mice were purchased from Envigo. P1-*Runx1*:GFP  
469 and P2-*Runx1*:RFP have been described previously (Draper et al., 2018; Sroczynska et al., 2009).  
470 Colonies were maintained on a ICR (CD-1) background. C57Bl/6J *Runx1*<sup>mER-CRE-mER</sup> (Samokhvalov  
471 et al., 2007) were provided by RIKEN (Japan). C57Bl/6J *Rosa26*<sup>flox-stop-flox-tdRFP</sup> mice (Luche et al.,  
472 2007) were acquired from the European Mouse Mutant Archive (EMMA). For all transgenic  
473 lines, routine genotyping was undertaken at weaning (3 weeks of age) by automated PCR  
474 genotyping (Transnetyx). For timed mating experiments, vaginal plug detection was considered  
475 as embryonic day (E) 0.5.

476  
477 All animal procedures were performed on adult males at least 7 weeks of age. Surgical  
478 castration was carried out under aseptic conditions. For prostate regeneration assays,  
479 testosterone pellets (Belma Technologies) were implanted subcutaneously. For *in vivo* genetic  
480 lineage-tracing experiments, tamoxifen (Sigma, T5648) was resuspended in ethanol and diluted

481 in corn oil at a concentration of 10 mg/mL and administered via intra-peritoneal injections daily  
482 for 4 consecutive days using the following regimen: 3mg, 2mg, 2mg, 2mg.

483

#### 484 **Isolation of mouse prostate cells**

485 All dissections were performed under a stereo microscope in sterile PBS. Dissociated murine  
486 prostate cells were obtained by digesting pre-minced prostate tissue for 1h at 37°C in digestive  
487 medium prepared in prepared in ADMEM/F12 (Gibco), and containing 1mg/mL Collagenase  
488 Type I (ThermoFischer Scientific, #17018029), 1mg/mL Dispase II (ThermoFischer Scientific,  
489 #17105041), 10% Fetal Bovine Serum (Gibco), 1% Penicillin-Streptomycin-Glutamine (Sigma),  
490 and 10 µM Y-27632 dyhydrochloride (Chemdea, #CD0141). For embryonic urogenital sinuses  
491 (UGS), dissociation time was reduced to 30 min. Single cells were obtained after an additional  
492 10 min incubation in TrypLE (Gibco) at 37°C before mechanical dissociation with a syringe and  
493 needle (25G). Cells were then filtered through a 50 µm cell strainer.

494

#### 495 **Flow-cytometry and cell-sorting**

496 Single cell suspensions were kept in Advanced DMEM/F-12 (Gibco) containing 5% FBS  
497 supplemented with 10 µM Y-27632. Cells were incubated for 10 min using unconjugated anti-  
498 mouse CD16/32 antibody (Biolegend, C93, #101301) at 4°C prior to labelling with specific  
499 fluorochrome-labelled antibodies. Details of FACS reagents and antibodies are listed in Table 3.  
500 Cells were filtered through a 50 µm cell strainer prior to acquisition. Hoechst 33258 or Sytox  
501 blue (ThermoFischer Scientific) were used as viability stains. Single-cell suspensions were

502 analyzed on a Fortessa (BD Biosciences) and sorts were performed on a FACSAriaIII (BD  
503 Biosciences). FACS data were analyzed using FlowJo software (BD Life Sciences).

504

### 505 **Organoid formation assays**

506 *In vitro* organoid formation assays were performed as described in Drost et al., 2016. Single  
507 cells were resuspended in 40  $\mu$ L drops of phenol red-free Cultrex RGF BME Type 2 (BME 2,  
508 Amsbio, #3533-005-02), and seeded in CellCarrier-96 Ultra Microplates (PerkinElmer,  
509 #6055302). Defined organoid culture medium was prepared with Advanced DMEM/F-12  
510 (Gibco), supplemented with 10 mM Hepes (Sigma), Gutamax (Gibco), Penicillin/Streptomycin  
511 (Sigma), B27 (Life Technologies, 17504-044), 50 mg/mL EGF (PeproTech, #AF-100-15), 500  
512 ng/mL R-spondin 1 (R&D Systems, #4645-RS), 100 ng/mL Noggin (R&D Systems, #6057-NG), 10  
513 mM Y-27632 dihydrochloride (Chemdea, #CD0141), 200nM A83-01 (Tocris Bioscience, #2939),  
514 1.25 mM N-Acetylcystein (Sigma), and 1 nM Dihydrotestosterone (DHT, Sigma #730637).  
515 Medium was refreshed every 2-3 days, and organoid cultures were scored after 7 days.

516

### 517 **UGS explant cultures**

518 UGS explant cultures were performed as described previously (Kruithof-de Julio et al.,  
519 2013). Briefly, E15.5 embryos were obtained from timed matings. Urogenital sinuses (UGS)  
520 were isolated from the embryos and cultured using a Durapore Membrane Filter 0.65  $\mu$ m  
521 (#DVPP02500) placed on a stainless-steel mesh for up to 7 days in Ham's F-12/DMEM (Gibco)  
522 supplemented with Insulin-Transferrin-Sodium Selenite Supplement (Roche) and 10  $\mu$ M  
523 dihydrotestosterone (Sigma). Media were renewed every 2-3 days. For lineage-tracing

524 experiments, tamoxifen-induced labelling was performed using 0.5  $\mu$ M 4-hydroxytamoxifen  
525 (#T176, Sigma).

526

## 527 **Immunohistochemistry**

528 Prostate tissues were harvested and fixed in 10% buffered formalin for 24h. Fixed tissues  
529 were processed using standard procedures and embedded in paraffin. Formalin-fixed paraffin-  
530 embedded (FFPE) sections (4  $\mu$ m) were cut and dried overnight at 37°C. Multiplexed  
531 immunofluorescent stainings of FFPE sections were performed on an automated Leica BOND RX  
532 platform using the Opal multiplexing workflow (PerkinElmer). In brief, sections were dewaxed,  
533 and rehydrated, and endogenous peroxidase activity was quenched by 10 min pre-treatment  
534 with 3% hydrogen peroxide diluted in TBS-T (Tris-Buffered Saline 0.05% Tween-20). Following  
535 on-board heat-induced epitope retrieval with citrate buffer (pH 6.0) for 20 min, sections were  
536 incubated for 10 min with 10% Casein (Vector Laboratories) diluted in TBS-T. Each staining cycle  
537 included a primary antibody incubation for 30 min, followed by buffer washes, and 30 min  
538 incubation with HRP labelled secondary antibodies (Table 2). After further washes, the  
539 Tyramide labeled with a fluorophore (Opal 520, Opal 570 or Opal 650, PerkinElmer) was added  
540 for a final 10 min. Subsequent antibody stainings were performed by repeating the same  
541 procedure, separated by heat-mediated antibody denaturation using citrate buffer (pH 6.0) for  
542 5 min at 95°C. Nuclei were counterstained with DAPI (Sigma) and slides were sealed using  
543 ProLong Gold Antifade Mountant (ThermoFischer Scientific). *In situ* hybridization (ISH) to detect  
544 *Nupr1* (ACD, LS 2.5 Mm-Nupr1 #434818) was done using the Multiplex Fluorescent detection kit  
545 (ACD) on the automated Leica BOND RX platform following the manufacturer's instructions.

546 Pre-treatment was done using an EDTA based pH 9.0 epitope retrieval solution for 15 min at  
547 88°C followed by 10 min protease incubation. After ISH, antibody staining was carried out using  
548 an anti-RFP antibody for 1h detected with EnVision HRP anti-rabbit secondary (Agilent)  
549 followed by incubation with Tyramide-conjugated Opal 570 (PerkinElmer) as described above.  
550 Anti-CDH1 antibody was applied for 1h and detected using an anti-goat Alexa Fluor 647  
551 secondary antibody (ThermoFischer Scientific, #A-21447). Staining of frozen sections was  
552 performed as described previously (Thambyrajah et al., 2016). The list of antibodies used is  
553 available in Table 1.

554

### 555 **Image acquisition and analysis**

556 Whole-slide images were acquired on an Olympus VS120 slide scanner. Images were  
557 analyzed using QuPath v0.2 (Bankhead et al., 2017). Briefly, annotations were drawn manually  
558 to select areas of interest. Nuclear detection was achieved using the “cell detection” module on  
559 the DAPI channel. A classifier was then trained for each batch of images using the random  
560 forest algorithm, to detect the epithelial layers based on either CDH1 or K5/K8 stainings. Single-  
561 cell intensity measurements were analyzed using R (3.6.3). For Quantitative Imaged-Based  
562 Cytometry (QBIC), single-cell intensity measurements were log<sub>10</sub> transformed and plotted  
563 using the ‘geom\_hex’ function of the ggplot2 R package. QuPath was used to extract  
564 representative high-quality raw images of selected areas from whole slide images using the  
565 ‘Send region to ImageJ’ tool. Images used for publication were processed with ImageJ (NIH  
566 Image, Maryland, USA). Confocal images were acquired using a Leica TCS SP8 confocal



567 microscope and LAS X Leica software. Images of whole UGS explant culture were taken using a  
568 Leica MZ FLIII microscope.

569

### 570 **Whole-mount immunofluorescent staining of organoids**

571 Whole-mount staining was adapted from Yokomizo et al., 2012. Organoids were fixed  
572 directly in 96-well plates using 4% paraformaldehyde for 1h at 4°C. After 3 washes of 5 min in  
573 PBS, organoids were incubated in PBS-BST, containing PBS, 1% milk, 1% BSA, 10% goat serum  
574 (Agilent, #X090710), 0.4% Triton X-100. Pre-conjugated primary antibodies, K5 Alexa Fluor 647  
575 (#ab193895, Abcam) and K8 Alexa Fluor 488 (#ab192467, Abcam) were diluted at 1/400 in PBS-  
576 BST and incubated with the organoids overnight at 4°C on a rocking platform. After 3 washes of  
577 1h in PBS-BST at 4°C, organoids were stained with DAPI at 2 µg/mL diluted in PBS-BST and  
578 incubated for another 30 min at 4°C on a rocking platform. Images were acquired on an Opera  
579 Phenix High Content Screening System using the 10x air and 20x water lenses. Quantitative  
580 analysis was performed using the Harmony software on maximum projection images.

581

### 582 **scRNA-seq sample preparation**

583 A detailed description of the samples, replicates, and the corresponding cellular populations  
584 used for each sequencing run is provided in Supplementary file 1. For the adult mouse prostate  
585 dataset, AP, DLP, and VP lobes were micro dissected and pooled from P2-*Runx1*:RFP reporter  
586 mice after dissociation. Single live EPCAM<sup>+</sup> cells from RFP<sup>+</sup> and RFP<sup>-</sup> fractions of each lobes were  
587 sorted separately (containing a mix of CD49<sup>high</sup> basal and CD24<sup>high</sup> luminal cells). For the UGS  
588 explant culture dataset, the middle regions of the explants were micro dissected to enrich for

589 prostatic branching events and pooled by time point after dissociation. Single live EPCAM+ cells  
590 were sorted for each independent time point.

591

### 592 **scRNA-seq sample multiplexing**

593 Individually sorted populations were multiplexed using the MULTI-seq protocol (McGinnis,  
594 Patterson, et al., 2019). Reagents were kindly provided by Dr. Zev Gartner. In brief, after  
595 sorting, cells were washed once in cold serum- and BSA-free PBS. A lipid-modified DNA  
596 oligonucleotide and a specific sample barcode oligonucleotide were then mixed and added to  
597 the cells at a final concentration of 200 nM each, and incubated in cold PBS for 5 min. Each  
598 individual sample to be multiplexed received an independent sample barcode. Next, a common  
599 lipid-modified co-anchor was added at 200 nM to each sample to stabilize the membrane  
600 bound barcodes. After an additional 5 min incubation on ice, cells were washed 2 times with  
601 PBS containing 1% FBS 1% BSA in order to quench unbound barcodes. Samples were then  
602 pooled together and washed once with PBS 1% FBS 1% BSA. After cell counting, cells were  
603 loaded in a Chromium Single Cell 3' GEM Library & Gel Bead Kit v3 (10x Genomics).

604

### 605 **scRNA-seq library preparation, sequencing and pre-processing**

606 Gene expression (cDNA) libraries were prepared according to the manufacturer's protocol.  
607 MULTI-seq barcode libraries were separated from the cDNA libraries during the first round of  
608 size selection, and PCR amplified prior to sequencing according to the MULTI-seq library  
609 preparation protocol (McGinnis, Patterson, et al., 2019). For the adult mouse prostate dataset,  
610 cDNA libraries of 'run 1' and 'run 2' were sequenced on Illumina NovaSeq 6000 System, and

611 'run 3' was sequenced on Illumina HiSeq 2500. The UGS mouse prostate explant run was also  
612 sequenced on Illumina HiSeq 2500. Sequencing data of cDNA libraries were processed using  
613 Cellranger v3.1.0 and mapped onto mm10 mouse reference genome. Pre-processing of the  
614 MULTI-seq library fastq files was performed using the 'deMULTIplex' (v1.0.2) R package  
615 (<https://github.com/chris-mcginnis-ucsf/MULTI-seq>) to generate a sample barcode UMI count  
616 matrix. Detailed quality control metrics of each sequencing run are provided in Supplementary  
617 file 1.

618

### 619 **Adult mouse prostate dataset analysis**

620 *Quality control and barcode demultiplexing of individual runs.* Each run was pre-processed  
621 individually prior data integration. Cellranger outputs were loaded into the R package Seurat  
622 (v3.1.5). Cells were kept if they had more than 750 detected genes, less than 7500 UMIs and  
623 less than 10% mitochondrial transcripts. Sample barcodes were demultiplexed using the  
624 HTODemux function implemented in Seurat. Briefly, a negative binomial distribution was used  
625 to estimate the background levels based on  $k$ -means clustering of the barcode normalized  
626 counts. Barcodes with values above the 99% quantile were considered 'positive' for a given  
627 sample. Cells positive for more than one barcode were considered as 'doublets'. Doublets and  
628 negative cells were excluded for all downstream analyses. Thresholds were empirically adjusted  
629 to remove additional cells with possible ambiguous classification (Supplementary file 1). Of  
630 note, in both 'run 1' and 'run 2', a large number of cells were classified 'negative' due to the  
631 failed labelling of 'Bar3' (corresponding to 'Intact DLP RFP+' sample). For these runs, we used  
632 DoubletFinder (McGinnis, Murrow, et al., 2019) to remove predicted doublets missed out as a

633 consequence of the failed labeling of ‘Bar3’. After classification, barcodes were represented in  
634 UMAP space to confirm the purity of the barcode assignment obtained for each sample (Figure  
635 3–figure supplement 5A). We obtained a total of 4,499 cells from 3 independent experiments.  
636  
637 *Integration, low dimensional embedding and clustering.* Data aggregation was performed  
638 according to the standard integration procedure implemented in Seurat. In brief, each dataset  
639 was log normalized, and 3000 variable features were initially computed using the ‘vst’ method.  
640 For integration, 2000 features and 50 dimensions were used as anchors. Integrated data were  
641 scaled and the first 50 principal components (PC) were calculated for downstream analyses.  
642 Uniform Manifold Approximation and Projection (UMAP) (McInnes et al., 2018) was used for  
643 visualization. Graph-based louvain clustering was performed on a shared nearest neighbor  
644 graph constructed using 20 nearest neighbors for every cell, and a resolution of 0.4, which gave  
645 a reasonable segmentation of the data (Figure 3–figure supplement 5B,C). Extensive  
646 exploration of each cluster based on known marker genes was then carried out to subset  
647 prostate epithelial cells. We found 10 prostate epithelial clusters (*Epcam*, *Krt8*, *Cd24a*, *Spink1*,  
648 *Krt19*, *Tacstd2*, *Pscs*, *Krt4*, *Tgm4*, *Nkx3-1*, *Pbsn*, *Msmb*, *Piezo2*, *Trp63*, *Krt5*, *Krt14*), 3 clusters of  
649 hematopoietic cells (*Vim*, *Ptprc*, *Cd74*, *Itgam*, *Cd3d*), 1 cluster of endothelial cells (*Pecam1*), 1  
650 cluster of fibroblasts (*Vim*, *Col1a1*) and 1 cluster of mesonephric derivatives (*Svs2*, *Pax2*) (Figure  
651 3–figure supplement 5D,E).

652  
653 *Analysis of prostate epithelial populations.* The same dimension reduction approach described  
654 above was performed on the selected prostate epithelial clusters, using a resolution of 0.3 for

655 graph-based louvain clustering. We annotated 1 large population of basal cells by merging 3  
656 subclusters highly expressing *Krt5*, *Krt14* and *Trp63* as we did not discuss the heterogeneity of  
657 the basal compartment in this study (Figures 3B-D; Figure 3–figure supplement 6F,I). We  
658 annotated the different luminal clusters expressing higher levels of *Cd26/Dpp4*, *Cd24a*, *Krt8* and  
659 *Krt18*, as Lum-A, Lum-B, Lum-C, Lum-D, Lum-E and Lum-F. Several genes specifically marked  
660 each cluster, including *Sbp/Spink1* in Lum-A, *Tgm4* in Lum-B, *Msmb* in Lum-C, *Psca/Krt4* in Lum-  
661 D, *Basp1/Lpl* in Lum-E, and *Crym* in Lum-F (Figures 3C, D; Figure 3–figure supplement 7A). Data  
662 were then imported in Scanpy (v1.4.6) to infer lineage relationships between cellular  
663 populations via partition-based graph abstraction (PAGA) implemented in the `tl.paga` function  
664 (Wolf et al., 2019). Briefly, a single cell neighborhood graph (`n_neighbors = 50`) was computed  
665 using the integrated principal components previously calculated in Seurat. PAGA was generated  
666 based on our annotated clusters. The final UMAP representation was generated using PAGA-  
667 initialised positions to better preserve the global topology of the data. All final data  
668 visualizations were generated in R.

669

670 *Differential gene expression analysis and gene ontology.* Differential gene expression analyses  
671 between clusters were performed using the MAST method (Finak et al., 2015) implemented in  
672 Seurat within the ‘FindAllMarkers’ and ‘FindMarkers’ functions. Testing was limited to genes  
673 detected in at least 25% of the tested populations (`min.pct = 0.25`) and showing at least  $\pm 0.25$   
674 log fold change difference (`logfc.threshold = 0.25`). The ‘g:GOST’ function of the `gprofiler2` R  
675 package was used to perform functional enrichment analysis on gene ontology terms (GO:BP,

676 biological processes). Genes showing at least 0.50 log fold change enrichment in the group  
677 tested were kept.

678

#### 679 **UGS explant cultures dataset**

680 A similar strategy was applied for the analysis of the UGS explant culture dataset, with some  
681 alterations described below.

682

683 *Quality control and barcode demultiplexing.* Cells were kept if they had more than 1000  
684 detected genes, and less than 7.5% mitochondrial transcripts. Barcode classification was  
685 performed as above, using the 90% quantile in 'HTODemux' (Figure 6–figure supplement 12A).  
686 We obtained a total of 5,122 cells that passed quality control from the 4 time points.

687

688 *Low dimensional embedding and clustering.* The first 50 principal components and 20 neighbors  
689 were used for UMAP visualization. Graph-based clustering was done using a resolution  
690 parameter of 0.3. We noticed a strong effect of cell cycle using cell cycles genes defined in  
691 Tirosh et al., 2016. This was particularly evident using the 'CellCycleScoring' function  
692 implemented in Seurat (Figure 6–figure supplement 12B). To minimize the impact of cell cycle  
693 on downstream analyses, the cell cycle scores were regressed out during data scaling. We  
694 identified 6 main clusters, that we annotated based on the expression of several marker genes  
695 (Figure 6–figure supplement 12C-E). We identified 2 clusters of developing mesonephric  
696 derivatives (*Hoxb7*, *Wfdc2*, *Gata3*, *Sox17*, *Pax2*, *Pax8*, *Lhx1*), 1 cluster of developing bladder  
697 urothelium (*Upk3a*, *Foxq1*, *Plaur*, *Krt7*, *Krt20*), 1 cluster of mesenchymal cells (*Vim*, *Col3a1*,

698 *Col1a1, Pdgfra, Zeb1*) and 1 cluster corresponding to the developing prostatic epithelium  
699 (*Epcam, Krt8, Krt5, Krt14, Krt15, Shh, Hoxb13, Hoxd13, Nkx3-1*). We also identified one cluster  
700 largely associated with hypoxia and cellular stress ontologies (Figure 6–figure supplement 12F).

701  
702 *Analysis of the developing prostatic epithelium.* The same dimension reduction approach was  
703 initially applied on the developing prostatic cluster. After graph-based clustering using a  
704 resolution of 0.5, 10 clusters were identified and visualized via UMAP (Figure 6–figure  
705 supplement 12G-J). We computed diffusion components using ‘runDiffusionMap’  
706 (ncomponents = 20, k = 20) implemented in the scater (v1.14.6) R package. We found the small  
707 cluster C9 to be largely diverging from the remainder fraction in diffusion space, therefore it  
708 was excluded for downstream analysis (Figure 6–figure supplement 12K). We then imported  
709 the data in Scanpy and used the first 10 diffusion components to compute a neighborhood  
710 graph (n\_neighbors = 20) which was used for PAGA. We finally computed a force-direct layout  
711 (ForceAtlas2) using PAGA-initialised positions.

712  
713 *Analysis of gene set activity.* Gene signatures were generated from the list of differentially  
714 expressed genes by keeping those showing at least 0.50 log fold change enrichment in each  
715 given group. Gene lists were used as custom gene sets (Supplementary file 5) in the AUCell  
716 (Aibar et al., 2017) R package (v1.8.0). Briefly, AUCell uses the Area Under the Curve to evaluate  
717 the enrichment of a given gene set in each cell, in a ranking based manner. It outputs an AUC  
718 score for each individual cell, which is used to explore the relative expression of the signature.

719 Per cell AUC scores of each signatures were overlayed on the dimension reduction layout and  
720 plotted as boxplots to visualize enrichments across the different cellular subsets.

721

## 722 **Data availability**

723 Raw sequencing files and processed gene expression matrices have been deposited in the  
724 NCBI Gene Expression Omnibus under the accession number GSE151944. The processed  
725 datasets for both mouse adult prostate and UGS prostate explant cultures can be accessed via a  
726 searchable R Shiny application available at <http://shiny.cruk.manchester.ac.uk/pscapp/>. All  
727 code used to process data and generate figures is available on a public GitHub repository at  
728 <https://github.com/glacaud/prostate-scRNAseq>.

729

## 730 **Statistical analyses**

731 Statistical analyses were performed using Graphpad/Prism (v8.4.2). Data are  
732 represented as mean  $\pm$ SD. Two-tailed unpaired *t*-tests were used to compare means between  
733 two groups. Statistical significance was set at  $p < 0.05$ . For animal model studies, no statistical  
734 method was used to pre-determine the sample size. No randomization or blinding was used for  
735 *in vivo* studies.



## 736 **ACKNOWLEDGEMENTS**

737 We thank the laboratories' members for critical reading of the manuscript, in particular Dr.  
738 Michael Lie-a-ling, Dr. Alice Lallo and Dr. Catherine Winchester. We thank the staff at the  
739 Histology, Flow Cytometry, Advanced Imaging, Molecular Biology, and Breeding Unit Core  
740 facilities of CRUK Manchester Institute, as well as the CRUK Beatson Biological Services Unit and  
741 Flow Cytometry Core facility for technical support. We thank Dr. Zev Gartner for kindly  
742 providing the MULTI-seq reagents. We thank Dr. Kirsteen Campbell with assistance on the  
743 lineage tracing experiments. We thank Dr. Berenika Plusa and Dr. Roberto de la Fuente with  
744 assistance on timed matings experiments. We thank Professor Hans Jorg Fehling and the  
745 European Mouse Mutant Archive for providing the Rosa26<sup>flox-stop-flox-tdRFP</sup> mice.

746

## 747 **AUTHORS CONTRIBUTION**

748 Conceptualization, R.M., E.B., K.B., and G.L.; Methodology, R.M., E.B., K.B., and G.L.; Formal  
749 analysis, R.M.; Data curation, R.M.; Visualization, R.M.; Investigation, R.M., I.S., S.M., L.G., R.P.,  
750 M.Z.F.; Writing – Original Draft, R.M.; Writing – Review & Editing, R.M., I.S., K.B., E.B., G.L.;  
751 Resources, P.O., H.Y.L and I.A.; Supervision, E.B., K.B. and G.L.; Project Administration, G.L.;  
752 Funding Acquisition, E.B., K.B. and G.L.

753

## 754 **FUNDING**

755 This research was supported by CRUK core funding C5759/A20971 (G.L. and E.B., CRUK  
756 Manchester Institute) and C596/A17196 (K.B., CRUK Beatson Institute). The funders had no role

757 in study design, data collection and interpretation, or the decision to submit the work for  
758 publication.

759

760 **COMPETING INTERESTS**

761 The authors declare no competing interests.

762 **REFERENCES**

- 763 Aibar, S., González-Blas, C. B., Moerman, T., Huynh-Thu, V. A., Imrichova, H., Hulselmans, G.,  
764 Rambow, F., Marine, J.-C., Geurts, P., Aerts, J., van den Oord, J., Atak, Z. K., Wouters, J.,  
765 & Aerts, S. (2017). SCENIC: Single-cell regulatory network inference and clustering.  
766 *Nature Methods*, 14(11), 1083–1086. <https://doi.org/10.1038/nmeth.4463>
- 767 Banach-Petrosky, W., Jessen, W. J., Ouyang, X., Gao, H., Rao, J., Quinn, J., Aronow, B. J., &  
768 Abate-Shen, C. (2007). Prolonged exposure to reduced levels of androgen accelerates  
769 prostate cancer progression in Nkx3.1; Pten mutant mice. *Cancer Research*, 67(19),  
770 9089–9096. <https://doi.org/10.1158/0008-5472.CAN-07-2887>
- 771 Bankhead, P., Loughrey, M. B., Fernández, J. A., Dombrowski, Y., McArt, D. G., Dunne, P. D.,  
772 McQuaid, S., Gray, R. T., Murray, L. J., Coleman, H. G., James, J. A., Salto-Tellez, M., &  
773 Hamilton, P. W. (2017). QuPath: Open source software for digital pathology image  
774 analysis. *Scientific Reports*, 7(1), 16878. <https://doi.org/10.1038/s41598-017-17204-5>
- 775 Barros-Silva, J. D., Linn, D. E., Steiner, I., Guo, G., Ali, A., Pakula, H., Ashton, G., Peset, I., Brown,  
776 M., Clarke, N. W., Bronson, R. T., Yuan, G.-C., Orkin, S. H., Li, Z., & Baena, E. (2018).  
777 Single-Cell Analysis Identifies LY6D as a Marker Linking Castration-Resistant Prostate  
778 Luminal Cells to Prostate Progenitors and Cancer. *Cell Reports*, 25(12), 3504-3518.e6.  
779 <https://doi.org/10.1016/j.celrep.2018.11.069>
- 780 Berman, D. M., Desai, N., Wang, X., Karhadkar, S. S., Reynon, M., Abate-Shen, C., Beachy, P. A.,  
781 & Shen, M. M. (2004). Roles for Hedgehog signaling in androgen production and  
782 prostate ductal morphogenesis. *Developmental Biology*, 267(2), 387–398.  
783 <https://doi.org/10.1016/j.ydbio.2003.11.018>

- 784 Bhatia-Gaur, R., Donjacour, A. A., Sciavolino, P. J., Kim, M., Desai, N., Young, P., Norton, C. R.,  
785 Gridley, T., Cardiff, R. D., Cunha, G. R., Abate-Shen, C., & Shen, M. M. (1999). Roles for  
786 Nkx3.1 in prostate development and cancer. *Genes & Development*, *13*(8), 966–977.
- 787 Browne, G., Taipaleenmäki, H., Bishop, N. M., Madasu, S. C., Shaw, L. M., van Wijnen, A. J.,  
788 Stein, J. L., Stein, G. S., & Lian, J. B. (2015). Runx1 is associated with breast cancer  
789 progression in MMTV-PyMT transgenic mice and its depletion in vitro inhibits migration  
790 and invasion. *Journal of Cellular Physiology*, *230*(10), 2522–2532.  
791 <https://doi.org/10.1002/jcp.24989>
- 792 Burger, P. E., Xiong, X., Coetzee, S., Salm, S. N., Moscatelli, D., Goto, K., & Wilson, E. L. (2005).  
793 Sca-1 expression identifies stem cells in the proximal region of prostatic ducts with high  
794 capacity to reconstitute prostatic tissue. *Proceedings of the National Academy of  
795 Sciences of the United States of America*, *102*(20), 7180–7185.  
796 <https://doi.org/10.1073/pnas.0502761102>
- 797 Chimgé, N.-O., Little, G. H., Baniwal, S. K., Adisetiyo, H., Xie, Y., Zhang, T., O’Laughlin, A., Liu, Z.,  
798 Y., Ulrich, P., Martin, A., Mhawech-Fauceglia, P., Ellis, M. J., Tripathy, D., Groshen, S.,  
799 Liang, C., Li, Z., Schones, D. E., & Frenkel, B. (2016). RUNX1 prevents oestrogen-  
800 mediated AXIN1 suppression and  $\beta$ -catenin activation in ER-positive breast cancer.  
801 *Nature Communications*, *7*, 10751. <https://doi.org/10.1038/ncomms10751>
- 802 Choi, N., Zhang, B., Zhang, L., Ittmann, M., & Xin, L. (2012). Adult murine prostate basal and  
803 luminal cells are self-sustained lineages that can both serve as targets for prostate  
804 cancer initiation. *Cancer Cell*, *21*(2), 253–265. <https://doi.org/10.1016/j.ccr.2012.01.005>

- 805 Chua, C. W., Shibata, M., Lei, M., Toivanen, R., Barlow, L. J., Bergren, S. K., Badani, K. K.,  
806 McKiernan, J. M., Benson, M. C., Hibshoosh, H., & Shen, M. M. (2014). Single luminal  
807 epithelial progenitors can generate prostate organoids in culture. *Nature Cell Biology*,  
808 *16*(10), 951–961, 1–4. <https://doi.org/10.1038/ncb3047>
- 809 Clevers, H., & Watt, F. M. (2018). Defining Adult Stem Cells by Function, not by Phenotype.  
810 *Annual Review of Biochemistry*, *87*(1), 1015–1027. [https://doi.org/10.1146/annurev-](https://doi.org/10.1146/annurev-biochem-062917-012341)  
811 [biochem-062917-012341](https://doi.org/10.1146/annurev-biochem-062917-012341)
- 812 Crowell, P. D., Fox, J. J., Hashimoto, T., Diaz, J. A., Navarro, H. I., Henry, G. H., Feldmar, B. A.,  
813 Lowe, M. G., Garcia, A. J., Wu, Y. E., Sajed, D. P., Strand, D. W., & Goldstein, A. S. (2019).  
814 Expansion of Luminal Progenitor Cells in the Aging Mouse and Human Prostate. *Cell*  
815 *Reports*, *28*(6), 1499-1510.e6. <https://doi.org/10.1016/j.celrep.2019.07.007>
- 816 Crowley, L., Cambuli, F., Aparicio, L., Shibata, M., Robinson, B. D., Xuan, S., Li, W., Hibshoosh, H.,  
817 Loda, M., Rabadan, R., & Shen, M. M. (2020). A single-cell atlas of the mouse and human  
818 prostate reveals heterogeneity and conservation of epithelial progenitors. *BioRxiv*,  
819 2020.05.29.123836. <https://doi.org/10.1101/2020.05.29.123836>
- 820 Doles, J. D., Vezina, C. M., Lipinski, R. J., Peterson, R. E., & Bushman, W. (2005). Growth,  
821 morphogenesis, and differentiation during mouse prostate development in situ, in renal  
822 grafts, and in vitro. *The Prostate*, *65*(4), 390–399. <https://doi.org/10.1002/pros.20321>
- 823 Draper, J. E., Sroczynska, P., Fadlullah, M. Z. H., Patel, R., Newton, G., Breitwieser, W., Kouskoff,  
824 V., & Lacaud, G. (2018). A novel prospective isolation of murine fetal liver progenitors to  
825 study in utero hematopoietic defects. *PLoS Genetics*, *14*(1), e1007127.  
826 <https://doi.org/10.1371/journal.pgen.1007127>

- 827 Drost, J., Karthaus, W. R., Gao, D., Driehuis, E., Sawyers, C. L., Chen, Y., & Clevers, H. (2016).  
828 Organoid culture systems for prostate epithelial and cancer tissue. *Nature Protocols*,  
829 *11*(2), 347–358. <https://doi.org/10.1038/nprot.2016.006>
- 830 English, H. F., Santen, R. J., & Isaacs, J. T. (1987). Response of glandular versus basal rat ventral  
831 prostatic epithelial cells to androgen withdrawal and replacement. *The Prostate*, *11*(3),  
832 229–242.
- 833 Ferrari, N., Mohammed, Z. M. A., Nixon, C., Mason, S. M., Mallon, E., McMillan, D. C., Morris, J.  
834 S., Cameron, E. R., Edwards, J., & Blyth, K. (2014). Expression of RUNX1 Correlates with  
835 Poor Patient Prognosis in Triple Negative Breast Cancer. *PLoS ONE*, *9*(6), e100759.  
836 <https://doi.org/10.1371/journal.pone.0100759>
- 837 Finak, G., McDavid, A., Yajima, M., Deng, J., Gersuk, V., Shalek, A. K., Slichter, C. K., Miller, H. W.,  
838 McElrath, M. J., Prlic, M., Linsley, P. S., & Gottardo, R. (2015). MAST: A flexible statistical  
839 framework for assessing transcriptional changes and characterizing heterogeneity in  
840 single-cell RNA sequencing data. *Genome Biology*, *16*(1), 278.  
841 <https://doi.org/10.1186/s13059-015-0844-5>
- 842 Georgas, K. M., Armstrong, J., Keast, J. R., Larkins, C. E., McHugh, K. M., Southard-Smith, E. M.,  
843 Cohn, M. J., Batourina, E., Dan, H., Schneider, K., Buehler, D. P., Wiese, C. B., Brennan, J.,  
844 Davies, J. A., Harding, S. D., Baldock, R. A., Little, M. H., Vezina, C. M., & Mendelsohn, C.  
845 (2015). An illustrated anatomical ontology of the developing mouse lower urogenital  
846 tract. *Development (Cambridge, England)*, *142*(10), 1893–1908.  
847 <https://doi.org/10.1242/dev.117903>

- 848 Goldstein, A. S., Lawson, D. A., Cheng, D., Sun, W., Garraway, I. P., & Witte, O. N. (2008). Trop2  
849 identifies a subpopulation of murine and human prostate basal cells with stem cell  
850 characteristics. *Proceedings of the National Academy of Sciences of the United States of*  
851 *America*, *105*(52), 20882–20887. <https://doi.org/10.1073/pnas.0811411106>
- 852 Goto, K., Salm, S. N., Coetzee, S., Xiong, X., Burger, P. E., Shapiro, E., Lepor, H., Moscatelli, D., &  
853 Wilson, E. L. (2006). Proximal Prostatic Stem Cells Are Programmed to Regenerate a  
854 Proximal-Distal Ductal Axis. *STEM CELLS*, *24*(8), 1859–1868.  
855 <https://doi.org/10.1634/stemcells.2005-0585>
- 856 Höfner, T., Eisen, C., Klein, C., Rigo-Watermeier, T., Goepfing, S. M., Jauch, A., Schoell, B.,  
857 Vogel, V., Noll, E., Weichert, W., Baccelli, I., Schillert, A., Wagner, S., Pahernik, S., Sprick,  
858 M. R., & Trumpp, A. (2015). Defined Conditions for the Isolation and Expansion of Basal  
859 Prostate Progenitor Cells of Mouse and Human Origin. *Stem Cell Reports*, *4*(3), 503–518.  
860 <https://doi.org/10.1016/j.stemcr.2015.01.015>
- 861 Horton, C., Liu, Y., Yu, C., Xie, Q., & Wang, Z. A. (2019). Luminal-contact-inhibition of epithelial  
862 basal stem cell multipotency in prostate organogenesis and homeostasis. *Biology Open*,  
863 *8*(10). <https://doi.org/10.1242/bio.045724>
- 864 Joseph, D. B., Henry, G. H., Malewska, A., Iqbal, N. S., Ruetten, H. M., Turco, A. E., Abler, L. L.,  
865 Sandhu, S. K., Cadena, M. T., Malladi, V. S., Reese, J. C., Mauck, R. J., Gahan, J. C.,  
866 Hutchinson, R. C., Roehrborn, C. G., Baker, L. A., Vezina, C. M., & Strand, D. W. (2020).  
867 Urethral luminal epithelia are castration-insensitive cells of the proximal prostate. *The*  
868 *Prostate*. <https://doi.org/10.1002/pros.24020>

- 869 Karthaus, W. R., Hofree, M., Choi, D., Linton, E. L., Turkekul, M., Bejnood, A., Carver, B.,  
870 Gopalan, A., Abida, W., Laudone, V., Biton, M., Chaudhary, O., Xu, T., Masilionis, I.,  
871 Manova, K., Mazutis, L., Pe'er, D., Regev, A., & Sawyers, C. L. (2020). Regenerative  
872 potential of prostate luminal cells revealed by single-cell analysis. *Science*, *368*(6490),  
873 497–505. <https://doi.org/10.1126/science.aay0267>
- 874 Karthaus, W. R., Iaquinta, P. J., Drost, J., Gracanin, A., van Boxtel, R., Wongvipat, J., Dowling, C.  
875 M., Gao, D., Begthel, H., Sachs, N., Vries, R. G. J., Cuppen, E., Chen, Y., Sawyers, C. L., &  
876 Clevers, H. C. (2014). Identification of multipotent luminal progenitor cells in human  
877 prostate organoid cultures. *Cell*, *159*(1), 163–175.  
878 <https://doi.org/10.1016/j.cell.2014.08.017>
- 879 Keil, K. P., Mehta, V., Abler, L. L., Joshi, P. S., Schmitz, C. T., & Vezina, C. M. (2012). Visualization  
880 and quantification of mouse prostate development by in situ hybridization.  
881 *Differentiation; Research in Biological Diversity*, *84*(3), 232–239.  
882 <https://doi.org/10.1016/j.diff.2012.07.005>
- 883 Keita, M., Bachvarova, M., Morin, C., Plante, M., Gregoire, J., Renaud, M.-C., Sebastianelli, A.,  
884 Trinh, X. B., & Bachvarov, D. (2013). The RUNX1 transcription factor is expressed in  
885 serous epithelial ovarian carcinoma and contributes to cell proliferation, migration and  
886 invasion. *Cell Cycle (Georgetown, Tex.)*, *12*(6), 972–986.  
887 <https://doi.org/10.4161/cc.23963>
- 888 Kruithof-de Julio, M., Shibata, M., Desai, N., Reynon, M., Halili, M. V., Hu, Y.-P., Price, S. M.,  
889 Abate-Shen, C., & Shen, M. M. (2013). Canonical Wnt signaling regulates Nkx3.1  
890 expression and luminal epithelial differentiation during prostate organogenesis.



- 891 *Developmental Dynamics : An Official Publication of the American Association of*  
892 *Anatomists*, 242(10), 1160–1171. <https://doi.org/10.1002/dvdy.24008>
- 893 Kwon, O.-J., Zhang, L., Ittmann, M. M., & Xin, L. (2014). Prostatic inflammation enhances basal-  
894 to-luminal differentiation and accelerates initiation of prostate cancer with a basal cell  
895 origin. *Proceedings of the National Academy of Sciences of the United States of America*,  
896 111(5), E592-600. <https://doi.org/10.1073/pnas.1318157111>
- 897 Kwon, O.-J., Zhang, L., & Xin, L. (2016). Stem Cell Antigen-1 Identifies a Distinct Androgen-  
898 Independent Murine Prostatic Luminal Cell Lineage with Bipotent Potential. *STEM CELLS*,  
899 34(1), 191–202. <https://doi.org/10.1002/stem.2217>
- 900 Lawson, D. A., Xin, L., Lukacs, R. U., Cheng, D., & Witte, O. N. (2007). Isolation and functional  
901 characterization of murine prostate stem cells. *Proceedings of the National Academy of*  
902 *Sciences of the United States of America*, 104(1), 181–186.  
903 <https://doi.org/10.1073/pnas.0609684104>
- 904 Leong, K. G., Wang, B.-E., Johnson, L., & Gao, W.-Q. (2008). Generation of a prostate from a  
905 single adult stem cell. *Nature*, 456(7223), 804–808.  
906 <https://doi.org/10.1038/nature07427>
- 907 Lie-A-Ling, M., Mevel, R., Patel, R., Blyth, K., Baena, E., Kouskoff, V., & Lacaud, G. (2020). RUNX1  
908 Dosage in Development and Cancer. *Molecules and Cells*, 43(2), 126–138.  
909 <https://doi.org/10.14348/molcells.2019.0301>
- 910 Little, G. H., Baniwal, S. K., Adisetiyo, H., Groshen, S., Chimge, N.-O., Kim, S. Y., Khalid, O.,  
911 Hawes, D., Jones, J. O., Pinski, J., Schones, D. E., & Frenkel, B. (2014). Differential effects  
912 of RUNX2 on the androgen receptor in prostate cancer: Synergistic stimulation of a gene

- 913 set exemplified by SNAI2 and subsequent invasiveness. *Cancer Research*, 74(10), 2857–  
914 2868. <https://doi.org/10.1158/0008-5472.CAN-13-2003>
- 915 Lopes, E. S., Foster, B. A., Donjacour, A. A., & Cunha, G. R. (1996). Initiation of secretory activity  
916 of rat prostatic epithelium in organ culture. *Endocrinology*, 137(10), 4225–4234.  
917 <https://doi.org/10.1210/endo.137.10.8828481>
- 918 Luche, H., Weber, O., Nageswara Rao, T., Blum, C., & Fehling, H. J. (2007). Faithful activation of  
919 an extra-bright red fluorescent protein in ‘knock-in’ Cre-reporter mice ideally suited for  
920 lineage tracing studies. *European Journal of Immunology*, 37(1), 43–53.  
921 <https://doi.org/10.1002/eji.200636745>
- 922 Lukacs, R. U., Goldstein, A. S., Lawson, D. A., Cheng, D., & Witte, O. N. (2010). Isolation,  
923 cultivation and characterization of adult murine prostate stem cells. *Nature Protocols*,  
924 5(4), 702–713. <https://doi.org/10.1038/nprot.2010.11>
- 925 McAuley, E., Moline, D., VanOpstall, C., Lamperis, S., Brown, R., & Vander Griend, D. J. (2019).  
926 Sox2 Expression Marks Castration-Resistant Progenitor Cells in the Adult Murine  
927 Prostate. *Stem Cells (Dayton, Ohio)*, 37(5), 690–700. <https://doi.org/10.1002/stem.2987>
- 928 McGinnis, C. S., Murrow, L. M., & Gartner, Z. J. (2019). DoubletFinder: Doublet Detection in  
929 Single-Cell RNA Sequencing Data Using Artificial Nearest Neighbors. *Cell Systems*, 8(4),  
930 329–337.e4. <https://doi.org/10.1016/j.cels.2019.03.003>
- 931 McGinnis, C. S., Patterson, D. M., Winkler, J., Conrad, D. N., Hein, M. Y., Srivastava, V., Hu, J. L.,  
932 Murrow, L. M., Weissman, J. S., Werb, Z., Chow, E. D., & Gartner, Z. J. (2019). MULTI-  
933 seq: Sample multiplexing for single-cell RNA sequencing using lipid-tagged indices.  
934 *Nature Methods*, 16(7), 619–626. <https://doi.org/10.1038/s41592-019-0433-8>

- 935 McInnes, L., Healy, J., & Melville, J. (2018). UMAP: Uniform Manifold Approximation and  
936 Projection for Dimension Reduction. *ArXiv:1802.03426 [Cs, Stat]*.  
937 <http://arxiv.org/abs/1802.03426>
- 938 McNeal, J. E. (1981). The zonal anatomy of the prostate. *The Prostate*, 2(1), 35–49.  
939 <https://doi.org/10.1002/pros.2990020105>
- 940 Mevel, R., Draper, J. E., Lie-a-Ling, M., Kouskoff, V., & Lacaud, G. (2019). RUNX transcription  
941 factors: Orchestrators of development. *Development*, 146(17), dev148296.  
942 <https://doi.org/10.1242/dev.148296>
- 943 Ousset, M., Van Keymeulen, A., Bouvencourt, G., Sharma, N., Achouri, Y., Simons, B. D., &  
944 Blanpain, C. (2012). Multipotent and unipotent progenitors contribute to prostate  
945 postnatal development. *Nature Cell Biology*, 14(11), 1131–1138.  
946 <https://doi.org/10.1038/ncb2600>
- 947 Pignon, J.-C., Grisanzio, C., Geng, Y., Song, J., Shivdasani, R. A., & Signoretti, S. (2013). P63-  
948 expressing cells are the stem cells of developing prostate, bladder, and colorectal  
949 epithelia. *Proceedings of the National Academy of Sciences of the United States of*  
950 *America*, 110(20), 8105–8110. <https://doi.org/10.1073/pnas.1221216110>
- 951 Planagumà, J., Díaz-Fuertes, M., Gil-Moreno, A., Abal, M., Monge, M., García, A., Baró, T.,  
952 Thomson, T. M., Xercavins, J., Alameda, F., & Reventós, J. (2004). A differential gene  
953 expression profile reveals overexpression of RUNX1/AML1 in invasive endometrioid  
954 carcinoma. *Cancer Research*, 64(24), 8846–8853. [https://doi.org/10.1158/0008-](https://doi.org/10.1158/0008-5472.CAN-04-2066)  
955 [5472.CAN-04-2066](https://doi.org/10.1158/0008-5472.CAN-04-2066)

- 956 Planagumà, J., Gonzalez, M., Doll, A., Monge, M., Gil-Moreno, A., Baró, T., García, A., Xercavins,  
957 J., Alameda, F., Abal, M., & Reventós, J. (2006). The up-regulation profiles of  
958 p21WAF1/CIP1 and RUNX1/AML1 correlate with myometrial infiltration in endometrioid  
959 endometrial carcinoma. *Human Pathology*, 37(8), 1050–1057.  
960 <https://doi.org/10.1016/j.humpath.2006.03.007>
- 961 Richardson, G. D., Robson, C. N., Lang, S. H., Neal, D. E., Maitland, N. J., & Collins, A. T. (2004).  
962 CD133, a novel marker for human prostatic epithelial stem cells. *Journal of Cell Science*,  
963 117(16), 3539–3545. <https://doi.org/10.1242/jcs.01222>
- 964 Riggio, A. I., & Blyth, K. (2017). The enigmatic role of RUNX1 in female-related cancers—Current  
965 knowledge & future perspectives. *The FEBS Journal*, 284(15), 2345–2362.  
966 <https://doi.org/10.1111/febs.14059>
- 967 Samokhvalov, I. M., Samokhvalova, N. I., & Nishikawa, S. (2007). Cell tracing shows the  
968 contribution of the yolk sac to adult haematopoiesis. *Nature*, 446(7139), 1056–1061.  
969 <https://doi.org/10.1038/nature05725>
- 970 Scheitz, C. J. F., Lee, T. S., McDermitt, D. J., & Tumber, T. (2012). Defining a tissue stem cell-  
971 driven Runx1/Stat3 signalling axis in epithelial cancer. *The EMBO Journal*, 31(21), 4124–  
972 4139. <https://doi.org/10.1038/emboj.2012.270>
- 973 Scheitz, C. J. F., & Tumber, T. (2013). New insights into the role of Runx1 in epithelial stem cell  
974 biology and pathology. *Journal of Cellular Biochemistry*, 114(5), 985–993.  
975 <https://doi.org/10.1002/jcb.24453>

- 976 Shen, M. M., & Abate-Shen, C. (2010). Molecular genetics of prostate cancer: New prospects for  
977 old challenges. *Genes & Development*, *24*(18), 1967–2000.  
978 <https://doi.org/10.1101/gad.1965810>
- 979 Sroczynska, P., Lancrin, C., Kouskoff, V., & Lacaud, G. (2009). The differential activities of Runx1  
980 promoters define milestones during embryonic hematopoiesis. *Blood*, *114*(26), 5279–  
981 5289. <https://doi.org/10.1182/blood-2009-05-222307>
- 982 Sugimura, Y., Cunha, G. R., & Donjacour, A. A. (1986a). Morphogenesis of ductal networks in the  
983 mouse prostate. *Biology of Reproduction*, *34*(5), 961–971.  
984 <https://doi.org/10.1095/biolreprod34.5.961>
- 985 Sugimura, Y., Cunha, G. R., & Donjacour, A. A. (1986b). Morphological and histological study of  
986 castration-induced degeneration and androgen-induced regeneration in the mouse  
987 prostate. *Biology of Reproduction*, *34*(5), 973–983.
- 988 Takayama, K., Suzuki, T., Tsutsumi, S., Fujimura, T., Urano, T., Takahashi, S., Homma, Y.,  
989 Aburatani, H., & Inoue, S. (2015). RUNX1, an androgen- and EZH2-regulated gene, has  
990 differential roles in AR-dependent and -independent prostate cancer. *Oncotarget*, *6*(4),  
991 2263–2276. <https://doi.org/10.18632/oncotarget.2949>
- 992 Thambyrajah, R., Mazan, M., Patel, R., Moignard, V., Stefanska, M., Marinopoulou, E., Li, Y.,  
993 Lancrin, C., Clapes, T., Möröy, T., Robin, C., Miller, C., Cowley, S., Göttgens, B., Kouskoff,  
994 V., & Lacaud, G. (2016). GF11 proteins orchestrate the emergence of haematopoietic  
995 stem cells through recruitment of LSD1. *Nature Cell Biology*, *18*(1), 21–32.  
996 <https://doi.org/10.1038/ncb3276>

- 997 Tika, E., Ousset, M., Dannau, A., & Blanpain, C. (2019). Spatiotemporal regulation of  
998 multipotency during prostate development. *Development*, dev.180224.  
999 <https://doi.org/10.1242/dev.180224>
- 1000 Tirosh, I., Izar, B., Prakadan, S. M., Wadsworth, M. H., Treacy, D., Trombetta, J. J., Rotem, A.,  
1001 Rodman, C., Lian, C., Murphy, G., Fallahi-Sichani, M., Dutton-Regester, K., Lin, J.-R.,  
1002 Cohen, O., Shah, P., Lu, D., Genshaft, A. S., Hughes, T. K., Ziegler, C. G. K., ... Garraway, L.  
1003 A. (2016). Dissecting the multicellular ecosystem of metastatic melanoma by single-cell  
1004 RNA-seq. *Science*, 352(6282), 189–196. <https://doi.org/10.1126/science.aad0501>
- 1005 Toivanen, R., Mohan, A., & Shen, M. M. (2016). Basal Progenitors Contribute to Repair of the  
1006 Prostate Epithelium Following Induced Luminal Anoikis. *Stem Cell Reports*, 0(0).  
1007 <https://doi.org/10.1016/j.stemcr.2016.03.007>
- 1008 Toivanen, R., & Shen, M. M. (2017). Prostate organogenesis: Tissue induction, hormonal  
1009 regulation and cell type specification. *Development (Cambridge, England)*, 144(8), 1382–  
1010 1398. <https://doi.org/10.1242/dev.148270>
- 1011 Tsujimura, A., Koikawa, Y., Salm, S., Takao, T., Coetzee, S., Moscatelli, D., Shapiro, E., Lepor, H.,  
1012 Sun, T.-T., & Wilson, E. L. (2002). Proximal location of mouse prostate epithelial stem  
1013 cells. *The Journal of Cell Biology*, 157(7), 1257–1265.  
1014 <https://doi.org/10.1083/jcb.200202067>
- 1015 van Bragt, M. P. A., Hu, X., Xie, Y., & Li, Z. (2014). RUNX1, a transcription factor mutated in  
1016 breast cancer, controls the fate of ER-positive mammary luminal cells. *ELife*, 3, e03881.  
1017 <https://doi.org/10.7554/eLife.03881>

- 1018 Wang, B., Wang, X., Long, J. E., Eastham-Anderson, J., Firestein, R., & Junttila, M. R. (2015).  
1019 Castration-Resistant Lgr5+ Cells Are Long-Lived Stem Cells Required for Prostatic  
1020 Regeneration. *Stem Cell Reports*, 4(5), 768–779.  
1021 <https://doi.org/10.1016/j.stemcr.2015.04.003>
- 1022 Wang, X., Kruithof-de Julio, M., Economides, K. D., Walker, D., Yu, H., Halili, M. V., Hu, Y.-P.,  
1023 Price, S. M., Abate-Shen, C., & Shen, M. M. (2009). A luminal epithelial stem cell that is a  
1024 cell of origin for prostate cancer. *Nature*, 461(7263), 495–500.  
1025 <https://doi.org/10.1038/nature08361>
- 1026 Wang, X.-D., Wang, B.-E., Soriano, R., Zha, J., Zhang, Z., Modrusan, Z., Cunha, G. R., & Gao, W.-  
1027 Q. (2007). Expression profiling of the mouse prostate after castration and hormone  
1028 replacement: Implication of H-cadherin in prostate tumorigenesis. *Differentiation;*  
1029 *Research in Biological Diversity*, 75(3), 219–234. <https://doi.org/10.1111/j.1432->  
1030 [0436.2006.00135.x](https://doi.org/10.1111/j.1432-0436.2006.00135.x)
- 1031 Wang, Y., Hayward, S., Cao, M., Thayer, K., & Cunha, G. (2001). Cell differentiation lineage in the  
1032 prostate. *Differentiation; Research in Biological Diversity*, 68(4–5), 270–279.
- 1033 Wolf, F. A., Hamey, F. K., Plass, M., Solana, J., Dahlin, J. S., Göttgens, B., Rajewsky, N., Simon, L.,  
1034 & Theis, F. J. (2019). PAGA: Graph abstraction reconciles clustering with trajectory  
1035 inference through a topology preserving map of single cells. *Genome Biology*, 20(1), 59.  
1036 <https://doi.org/10.1186/s13059-019-1663-x>
- 1037 Xin, L., Lawson, D. A., & Witte, O. N. (2005). The Sca-1 cell surface marker enriches for a  
1038 prostate-regenerating cell subpopulation that can initiate prostate tumorigenesis.

- 1039 *Proceedings of the National Academy of Sciences of the United States of America*,
- 1040 102(19), 6942–6947. <https://doi.org/10.1073/pnas.0502320102>
- 1041 Yokomizo, T., Yamada-Inagawa, T., Yzaguirre, A. D., Chen, M. J., Speck, N. A., & Dzierzak, E.
- 1042 (2012). Whole-mount three-dimensional imaging of internally localized immunostained
- 1043 cells within mouse embryos. *Nature Protocols*, 7(3), 421–431.
- 1044 <https://doi.org/10.1038/nprot.2011.441>
- 1045 Yoo, Y. A., Roh, M., Naseem, A. F., Lysy, B., Desouki, M. M., Unno, K., & Abdulkadir, S. A. (2016).
- 1046 Bmi1 marks distinct castration-resistant luminal progenitor cells competent for prostate
- 1047 regeneration and tumour initiation. *Nature Communications*, 7, 12943.
- 1048 <https://doi.org/10.1038/ncomms12943>
- 1049 Zhang, D., Zhao, S., Li, X., Kirk, J. S., & Tang, D. G. (2018). Prostate Luminal Progenitor Cells in
- 1050 Development and Cancer. *Trends in Cancer*, 4(11), 769–783.
- 1051 <https://doi.org/10.1016/j.trecan.2018.09.003>
- 1052



1053 **TABLES**

1054 **Table 1. List of primary antibodies used for immunohistochemistry**

| Target | Provider        | Catalog Number | Raised specie |
|--------|-----------------|----------------|---------------|
| RUNX1  | Cell Signalling | 8529           | Rabbit        |
| NKX3.1 | Athenaes        | AES-0314       | Rabbit        |
| CDH1   | Thermo Fischer  | AF748          | Goat          |
| TP63   | Cell Signalling | M3562          | Rabbit        |
| K5     | Abcam           | ab52635        | Rabbit        |
| K8     | Abcam           | ab53280        | Rabbit        |
| K4     | Abcam           | Ab9004         | Mouse         |
| LY6D   | Proteintech     | 17361-1-AP     | Rabbit        |
| TROP-2 | R&D             | AF1122         | Goat          |
| BrdU   | Abcam           | ab6326         | Rat           |
| Ki67   | Abcam           | ab15580        | Rabbit        |
| RFP    | Rockland        | 600-402-379    | Rabbit        |
| RFP    | MBL             | PM005          | Rabbit        |
| GFP    | MBL             | 598            | Rabbit        |

1055

1056

1057

1058

1059

1060 **Table 2. List of primary antibodies used for immunohistochemistry**

| Antibody                  | Provider                 | Catalog Number |
|---------------------------|--------------------------|----------------|
| EnVision+/HRP Anti-Rabbit | Dako (Agilent)           | K4003          |
| EnVision+/HRP Anti-Rabbit | Dako (Agilent)           | K4001          |
| ImmPRESS HRP Anti-Goat    | Vector Laboratories      | MP-7405        |
| ImmPRESS HRP Anti-Rat     | Vector Laboratories      | MP-7444        |
| Donkey anti-Goat IgG 647  | ThermoFischer Scientific | A-21447        |

1061

1062 **Table 3. List of antibodies used for Fluorescence-Activated Cell Sorting (FACS)**

| Target  | Provider       | Catalog Number | Clone  | Fluorophore     |
|---------|----------------|----------------|--------|-----------------|
| CD16/32 | Biolegend      | 101301         | 93     | none (Fc block) |
| CD45    | Biolegend      | 62-0451-82     | 30-F11 | SB436           |
| EPCAM   | Biolegend      | 118225         | G8.8   | BV421           |
| EPCAM   | Biolegend      | 118214         | G8.8   | APC             |
| CD49f   | Biolegend      | 313606         | GoH3   | FITC            |
| CD49f   | Biolegend      | 313616         | GoH3   | APC             |
| CD24    | BD Biosciences | 744470         | M1/69  | BV786           |

1063

1064 **FIGURE SUPPLEMENTS**

1065 **Figure 1—figure supplement 1. RUNX1 is enriched in the mouse prostate epithelium.**

1066 **Figure 1—figure supplement 2. *Runx1* expression is mediated by the P2 promoter in the**  
1067 **mouse prostate epithelium.**

1068 **Figure 1—figure supplement 3. Characterization of P2-*Runx1*:RFP derived mouse prostate**  
1069 **organoids.**

1070 **Figure 2—figure supplement 4. Characterization of RUNX1 expression in the castrated mouse**  
1071 **prostate.**

1072 **Figure 3—figure supplement 5. Pre-processing of the scRNA-seq dataset of adult intact and**  
1073 **castrated mouse prostates.**

1074 **Figure 3—figure supplement 6. Characterization of the scRNA-seq prostate epithelial subset.**

1075 **Figure 3—figure supplement 7. Characterization of the scRNA-seq prostate epithelial dataset.**

1076 **Figure 3—figure supplement 8. Gene Ontology and differential expression analysis within the**  
1077 **scRNA-seq prostate epithelial dataset.**

1078 **Figure 4—figure supplement 9. Lineage tracing of RUNX1 expressing cells labelled in intact**  
1079 **mice.**

1080 **Figure 5—figure supplement 10. Characterization of RUNX1 expression during prostate**  
1081 **development *in vivo*.**

1082 **Figure 5—figure supplement 11. Characterization of RUNX1 expression during prostate**  
1083 **development in UGS explant cultures.**

1084 **Figure 6—figure supplement 12. Pre-processing of the scRNA-seq dataset of UGS explant**  
1085 **cultures.**

1086 **Figure 7—figure supplement 14. Lineage-tracing of RUNX1 expressing cells in UGS explants.**

1087 **Figure 6—figure supplement 13. Characterization of the developing prostatic epithelium in**

1088 **the scRNA-seq dataset of UGS explant culture.**

1089

## 1090 **SUPPLEMENTARY FILES**

1091 **Supplementary file 1. Quality control metrics and metadata of scRNAseq experiments**

1092 **Supplementary file 2. Genes differentially expressed between adult clusters**

1093 **Supplementary file 3. Genes differentially expressed in intact versus castrated Lum-D cells**

1094 **Supplementary file 4. Genes differentially expressed between UGS explants clusters**

1095 **Supplementary file 5. Gene lists used for the analysis of gene set activity**

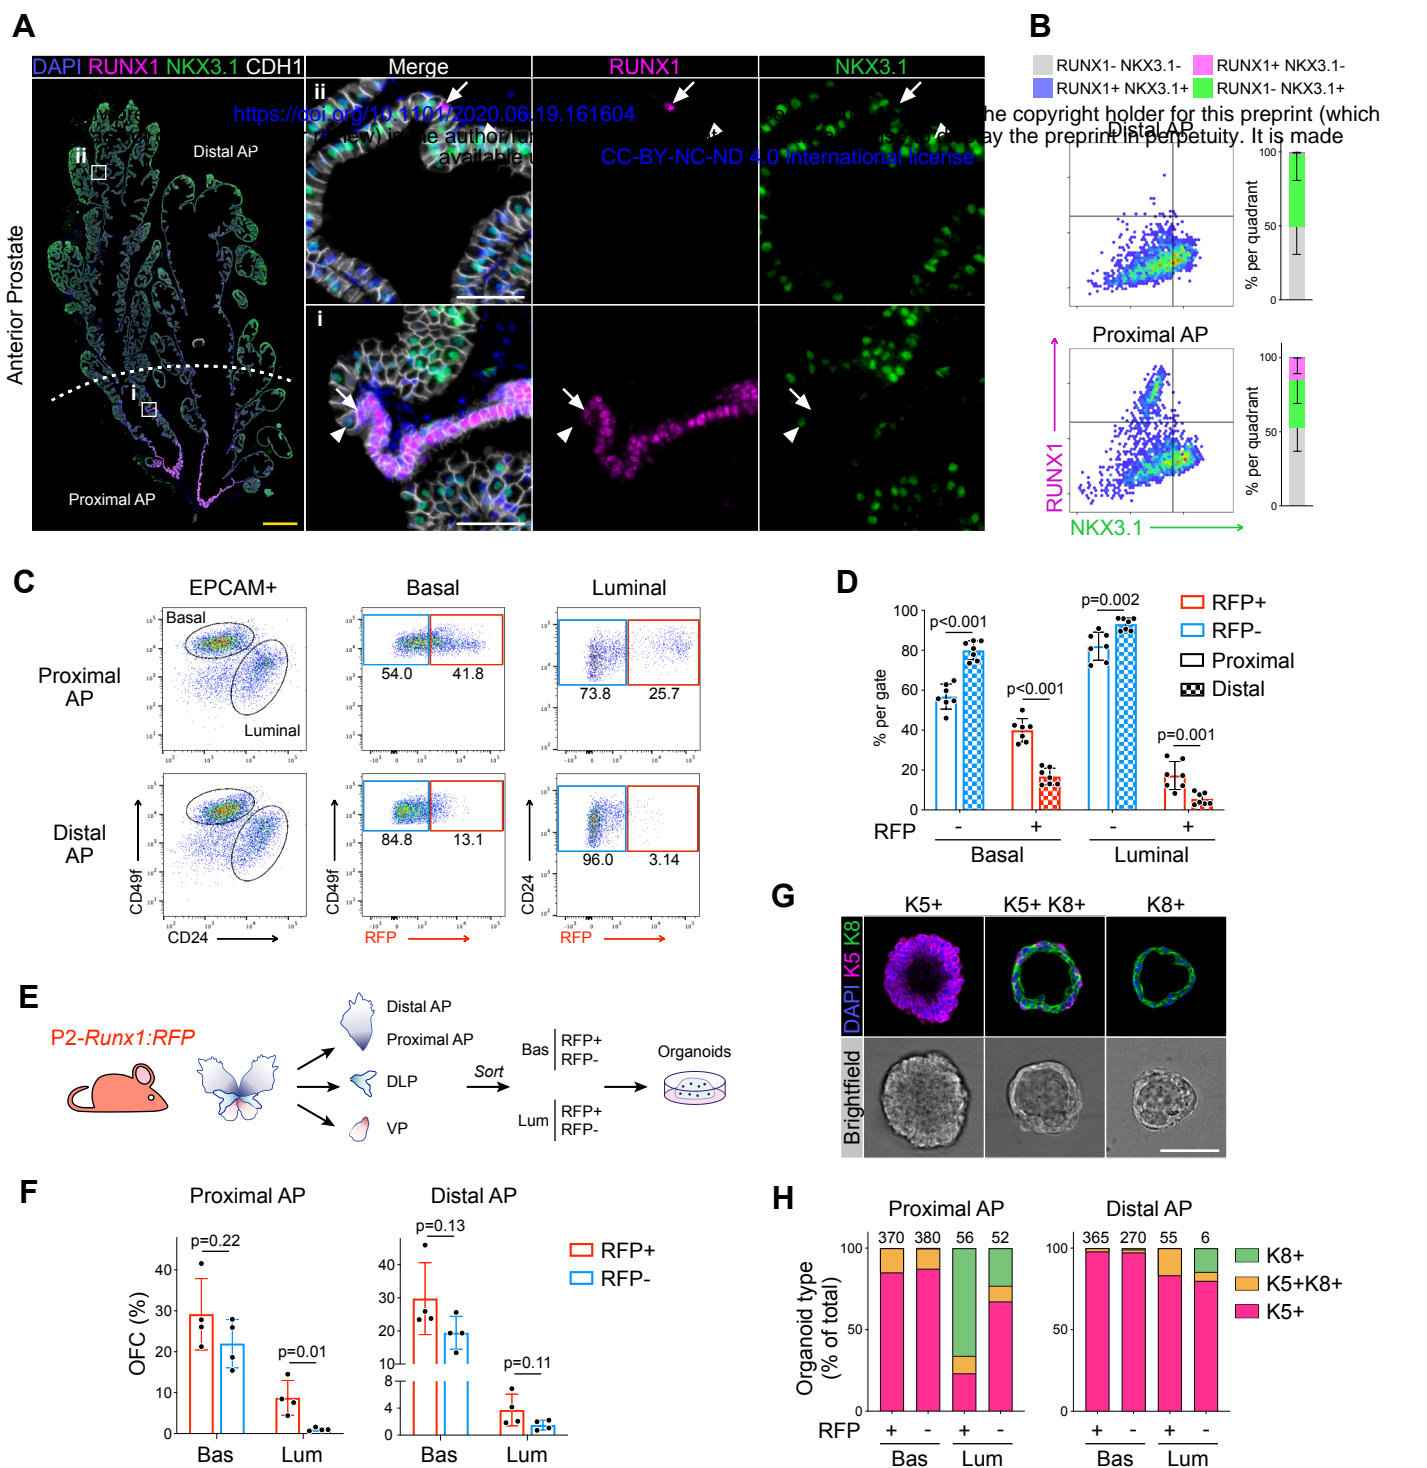

**Figure 1. RUNX1 marks a subpopulation of mouse proximal prostate luminal cells (PLCs).**

(A) Co-immunostaining of RUNX1, NKX3.1, CDH1 in the mouse Anterior Prostate (AP). Higher magnification images of (i) proximal AP and (ii) distal AP are shown. Arrows indicate RUNX1<sup>+</sup> NKX3.1<sup>-</sup> cells, arrowheads show RUNX1<sup>-</sup> NKX3.1<sup>+</sup> cells. Scale bars: 500µm (yellow) and 50µm (white). (B) Quantification of RUNX1 and NKX3.1 nuclear intensity (log<sub>10</sub>) in CDH1<sup>+</sup> epithelial cells by QIBC in proximal and distal AP. *n* = 6-8 mice. (C, D) Flow-cytometry analysis of P2-Runx1:RFP mice, and corresponding quantification of the percentages of RFP<sup>+</sup> and RFP<sup>-</sup> cells in the basal and luminal fractions of the proximal and distal AP. *n* = 7 mice. (E) Experimental strategy to grow organoids from sorted RFP<sup>+</sup> and RFP<sup>-</sup> cells from the basal (CD49f<sup>high</sup>) and luminal (CD24<sup>high</sup>) lineages of P2-Runx1:RFP mouse reporters. (F) Organoid Forming Capacity (OFC) of RFP<sup>+</sup> and RFP<sup>-</sup> basal and luminal sorted cells after 7 days in culture. *n* = 4 mice. (G) Whole-mount immunostaining of unipotent K5<sup>+</sup>, unipotent K8<sup>+</sup> or multipotent K5<sup>+</sup> K8<sup>+</sup> organoids. Scale bar: 50µm. (H) Quantification of the type of organoids characterized by whole-mount immunostaining, as in (G). Numbers of organoids quantified are shown above the graph. *n* = 2 mice per group.

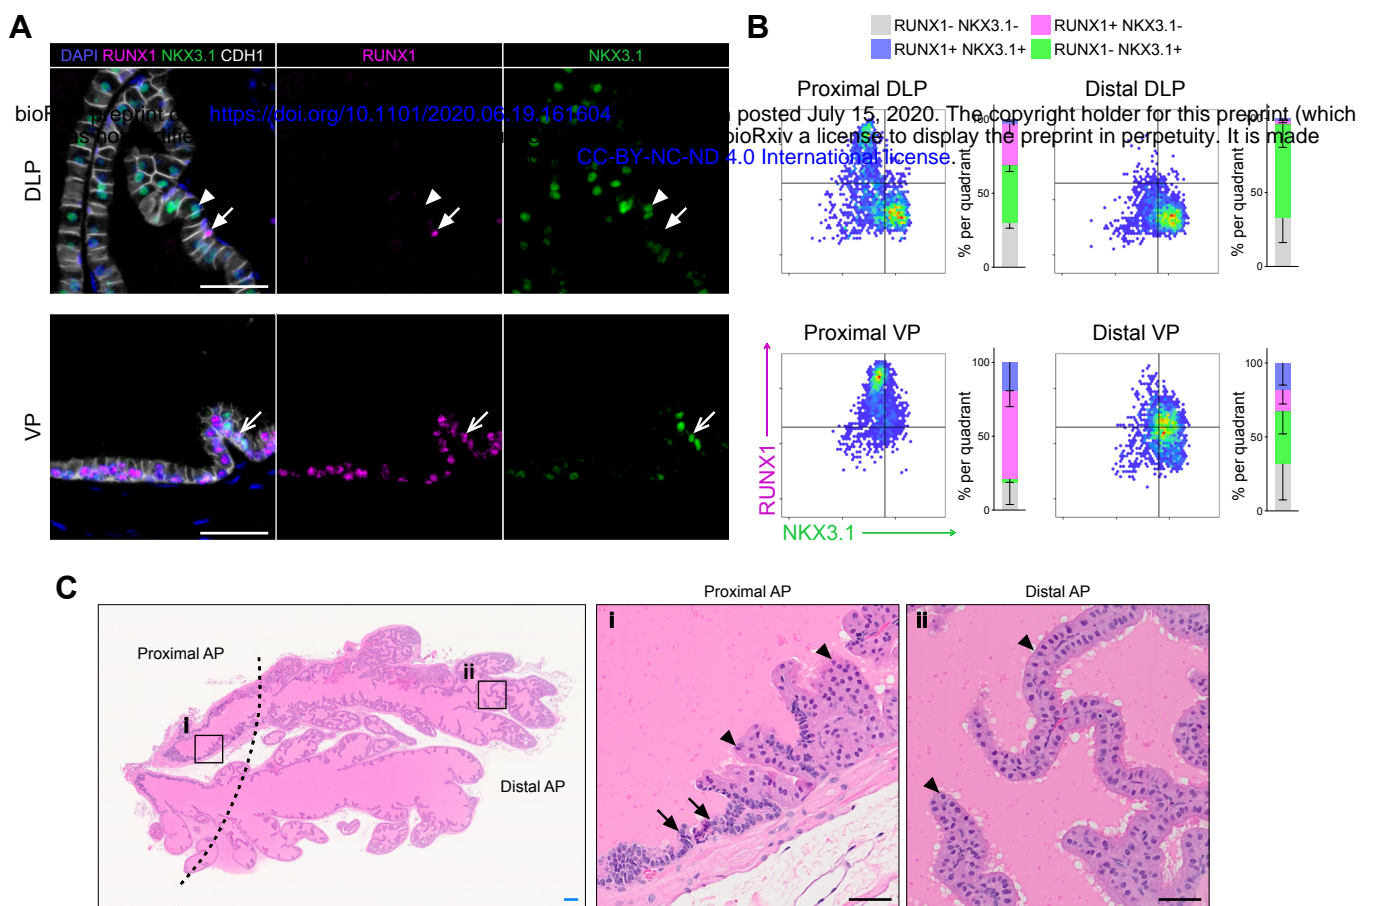

**Figure 1—figure supplement 1. RUNX1 is enriched in the mouse prostate epithelium.**

**(A)** Co-immunostaining of RUNX1, NKX3.1, CDH1 in the mouse DLP (top) and VP (bottom). Closed arrows indicate RUNX1<sup>+</sup> NKX3.1<sup>-</sup> cells, chevron arrows indicate rare RUNX1<sup>+</sup> NKX3.1<sup>+</sup> cells, arrowheads show RUNX1<sup>-</sup> NKX3.1<sup>+</sup> cells. Scale bars: 50µm. **(B)** Quantification of RUNX1 and NKX3.1 nuclear intensity (log<sub>10</sub>) in CDH1<sup>+</sup> epithelial cells by QBIC in proximal DLP ( $n = 3$ ), distal DLP ( $n = 8$ ), proximal VP ( $n = 3$ ) and distal VP ( $n = 8$ ). **(C)** H&E staining of the mouse AP. Higher magnification images of (i) proximal AP and (ii) distal regions are shown. Arrows show typical proximal luminal cells with condensed nuclei and cytoplasm, arrowheads show typical distal secretory luminal cells with enlarged cytoplasm and strong pink eosinophilic staining. Scale bars: 200µm (blue) and 50µm (black).

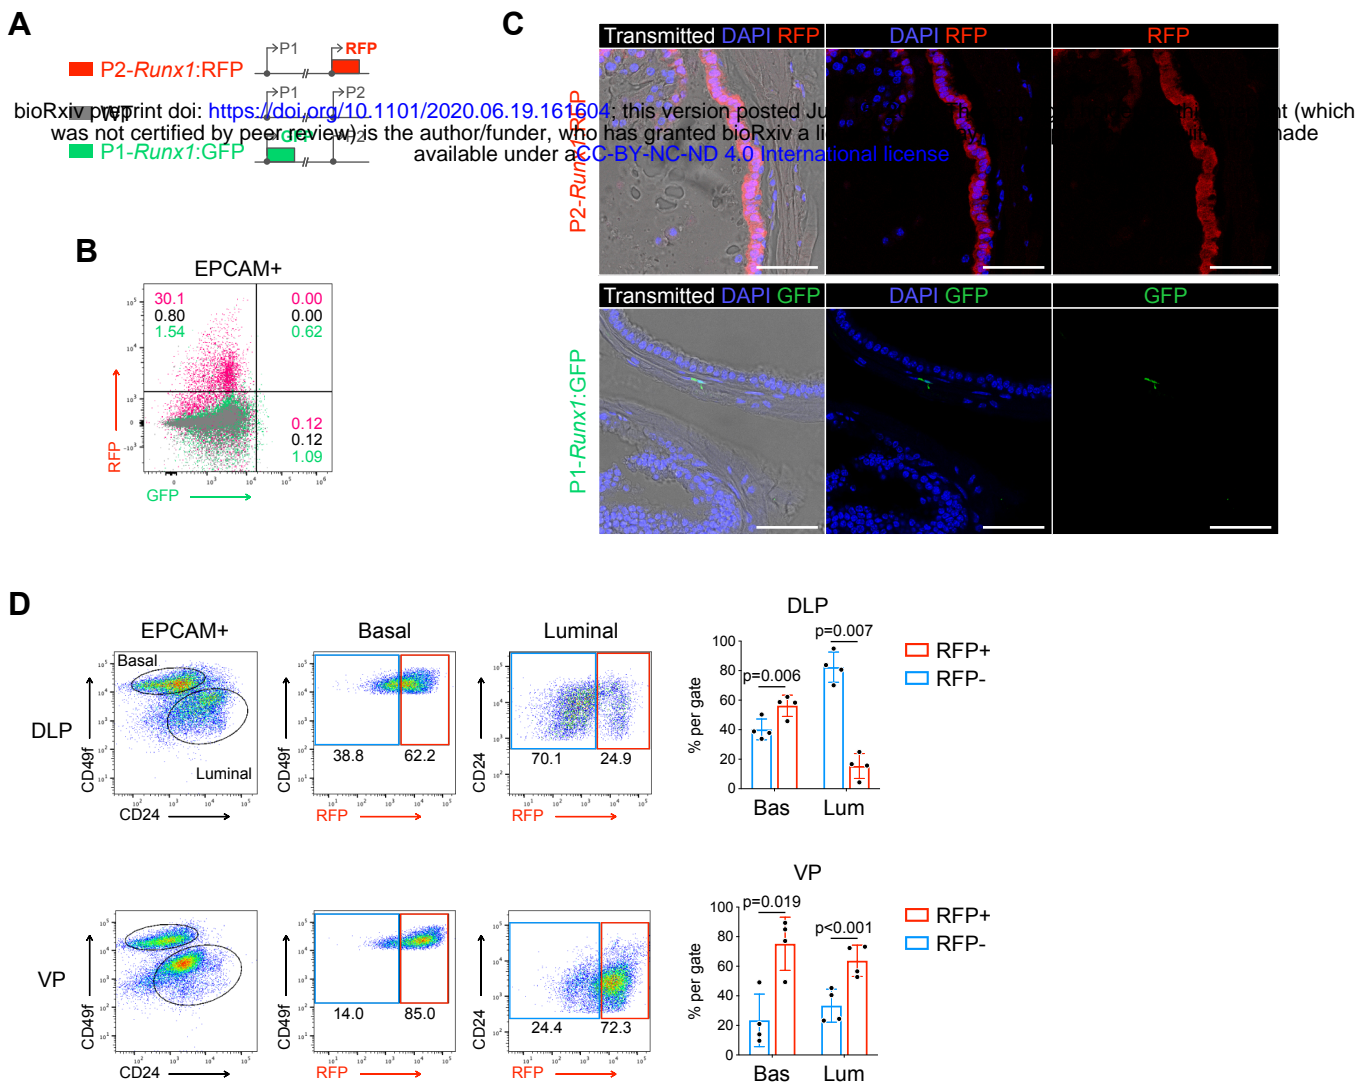

**Figure 1—figure supplement 2. *Runx1* expression is mediated by the P2 promoter in the mouse prostate epithelium.**

(A) Schematic diagrams of the P2-*Runx1*:RFP reporter allele (top), *Runx1* WT allele (middle), and P1-*Runx1*:GFP reporter allele (bottom). In P2-*Runx1*:RFP or P1-*Runx1*:GFP mice, expression of RFP or GFP is directed by *Runx1* proximal P2 or distal P1 promoter respectively. WT *Runx1* expression is directed by the remaining WT allele. (B) Flow-cytometry analysis of the epithelial EPCAM<sup>+</sup> fraction of WT, P2-*Runx1*:RFP and P1-*Runx1*:GFP mice. Percentages are indicated in each quadrant gates. (C) Confocal images indicating P2-*Runx1*:RFP signal in the glandular epithelium (top), while P1-*Runx1*:GFP (bottom) activity is detected in the surrounding stroma. Scale bar: 50 $\mu$ m. (D) Flow-cytometry analysis of P2-*Runx1*:RFP mice, and corresponding quantification of the percentages of RFP<sup>+</sup> and RFP<sup>-</sup> cells in the basal and luminal fractions of DLP ( $n = 4$  mice) and VP ( $n = 4$  mice) lobes.



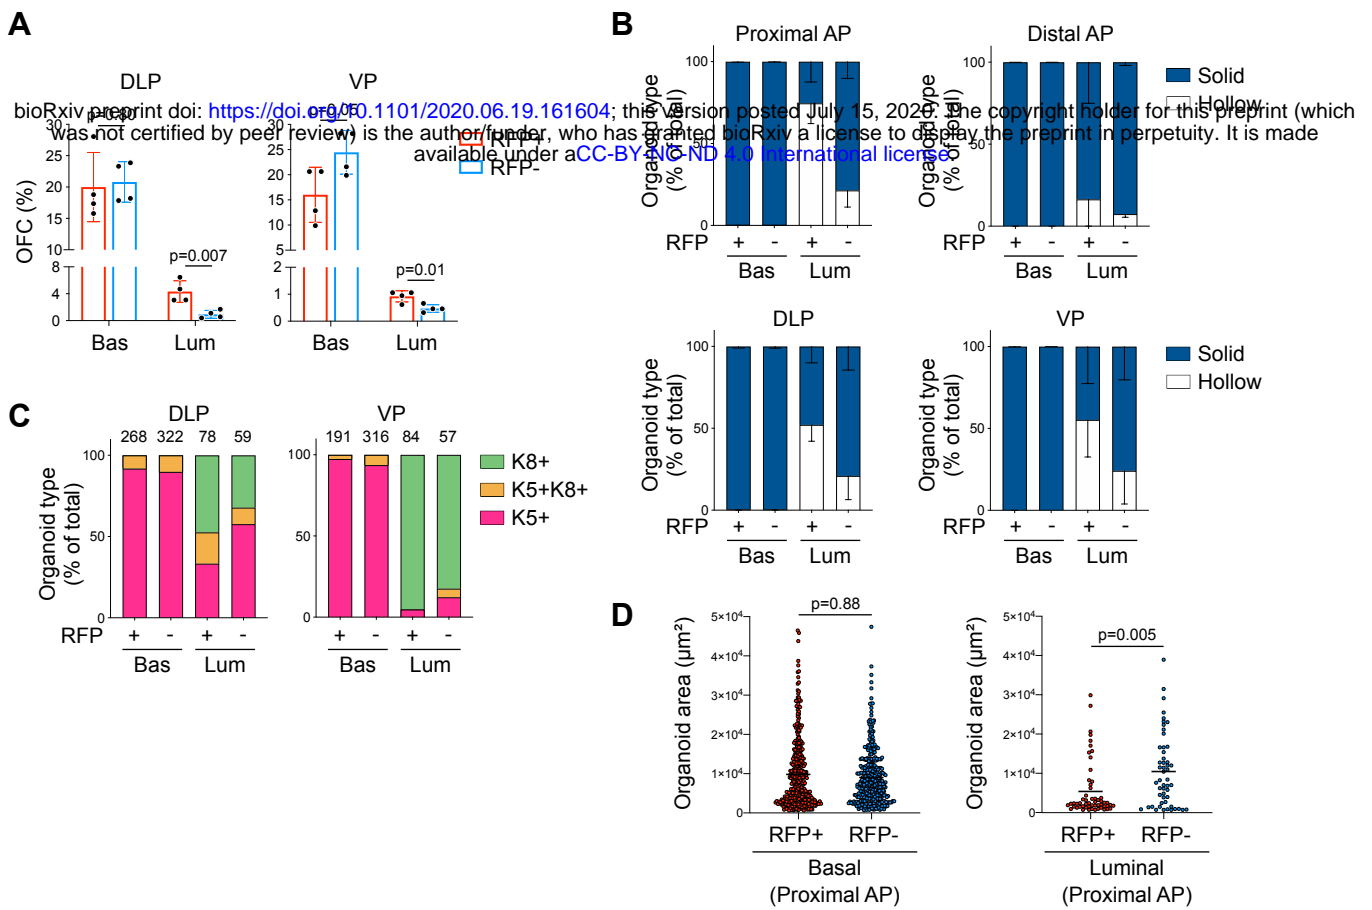

**Figure 1—figure supplement 3. Characterization of P2-Runx1:RFP derived mouse prostate organoids.**

(A) Organoid Forming Capacity (OFC) of RFP<sup>+</sup> and RFP<sup>-</sup> basal and luminal sorted cells from DLP (left) and VP (right) cultured for 7 days.  $n = 4$  independent experiments. (B) Quantification of organoid morphologies determined by brightfield assessment.  $n = 4$  mice. (C) Quantification of the type of organoids (pink: unipotent K5<sup>+</sup>, green: unipotent K8<sup>+</sup>, orange: multipotent K5<sup>+</sup> K8<sup>+</sup> organoids) characterized by whole-mount immunostaining.  $n = 2$  mice. (D) Quantification of the organoid area estimated from maximum projection of stacked images from basal (left) and luminal (right) fractions of the proximal AP. Numbers of organoids quantified are shown above the graph.  $n = 2$  mice.



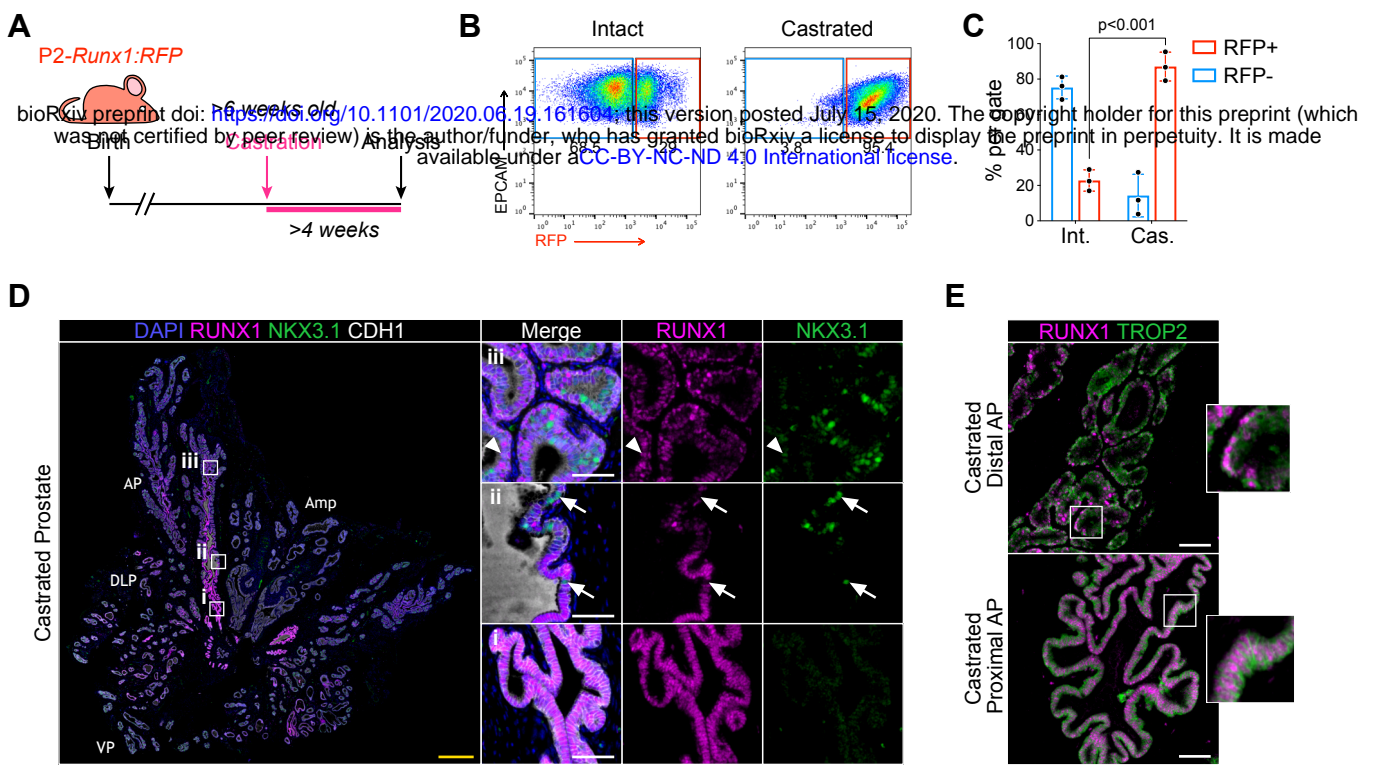

**Figure 2. RUNX1 expressing cells are enriched in the castrated prostate epithelium.**

(A) *P2-Runx1:RFP* reporter mice were surgically castrated between 6 to 12 weeks of age and analyzed at least 4 weeks post-castration. (B, C) Flow-cytometry analysis and corresponding quantification of the proportion of RFP<sup>+</sup> and RFP<sup>-</sup> cells in the EPCAM<sup>+</sup> fraction of intact and castrated prostates of *P2-Runx1:RFP* mice.  $n = 3$  mice per group. Int: Intact, Cas: Castrated. (D) Co-immunostaining of RUNX1, NKX3.1, CDH1 in the castrated wild-type mouse prostate. Higher magnification images of (i) proximal, (ii) intermediate and (iii) distal AP are shown. Arrows indicate cells RUNX1<sup>-</sup> NKX3.1<sup>+</sup> cells, arrowheads show luminal cell co-stained for RUNX1 and NKX3.1. Amp: ampullary gland. Scale bars: 500 $\mu$ m (yellow) and 50 $\mu$ m (white). Int: Intact, Cas: Castrated. (E) Co-immunostaining of RUNX1 and TROP2 showing colocalization of the 2 markers in both proximal (bottom) and distal (top) castrated AP. Scale bars: 50 $\mu$ m (white).

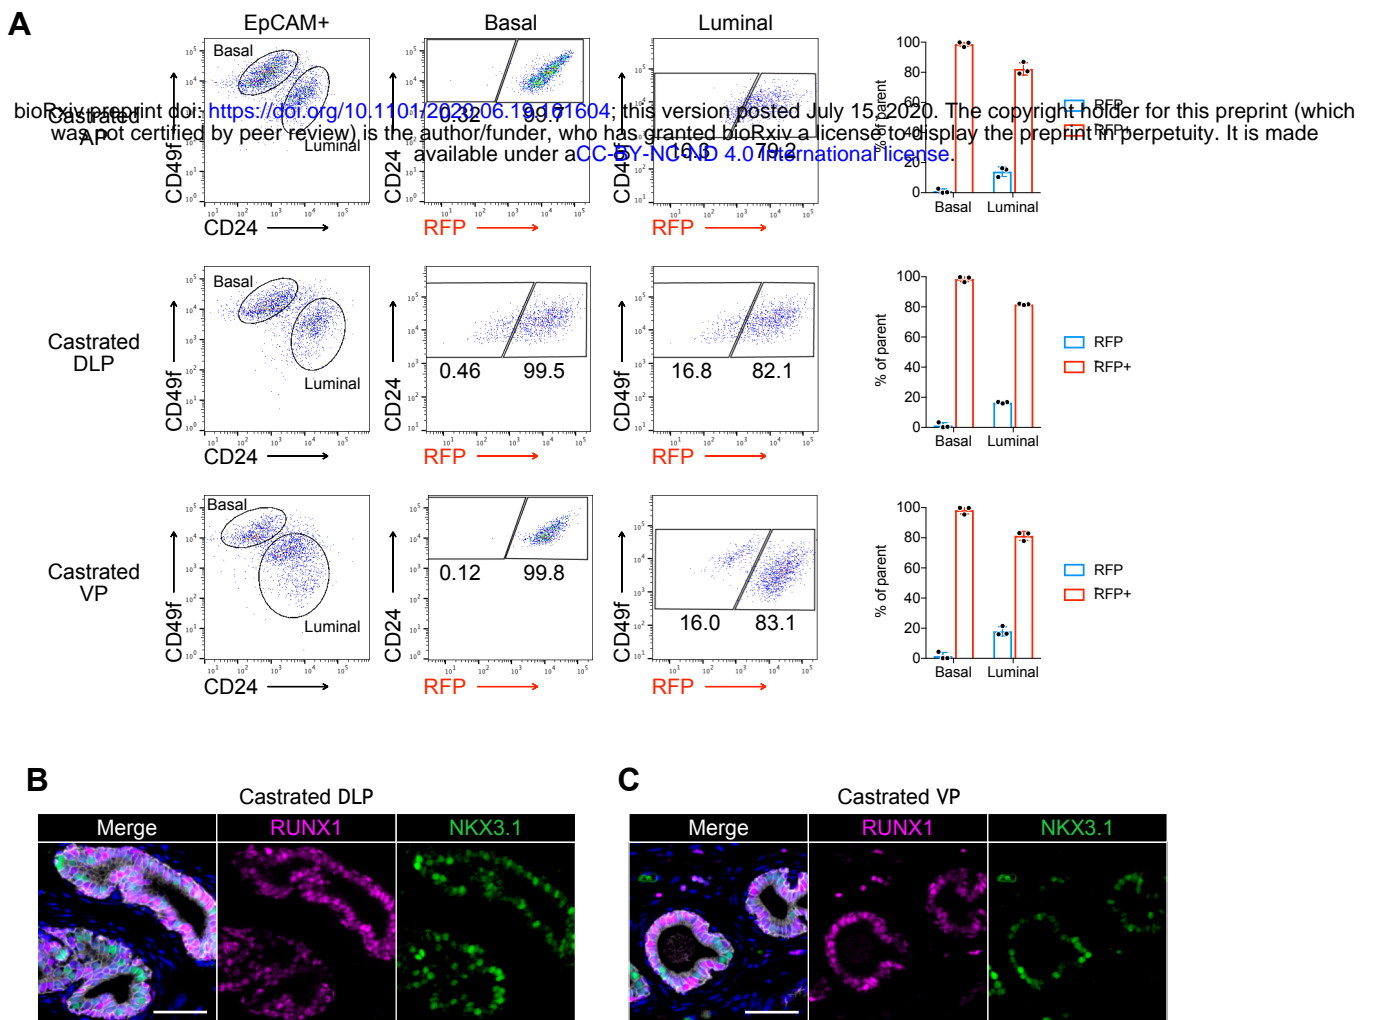

**Figure 2—figure supplement 4. Characterization of RUNX1 expression in the castrated mouse prostate.**

(A) Flow cytometry analysis and corresponding quantifications of the basal and luminal EPCAM<sup>+</sup> fraction from AP, DLP and VP lobes of castrated P2-*Runx1*:RFP mice ( $n = 3$ ). (B, C) Co-immunostaining of RUNX1, NKX3.1, CDH1 in castrated DLP (B) and VP (C) lobes. Scale bars: 50 $\mu$ m (white).

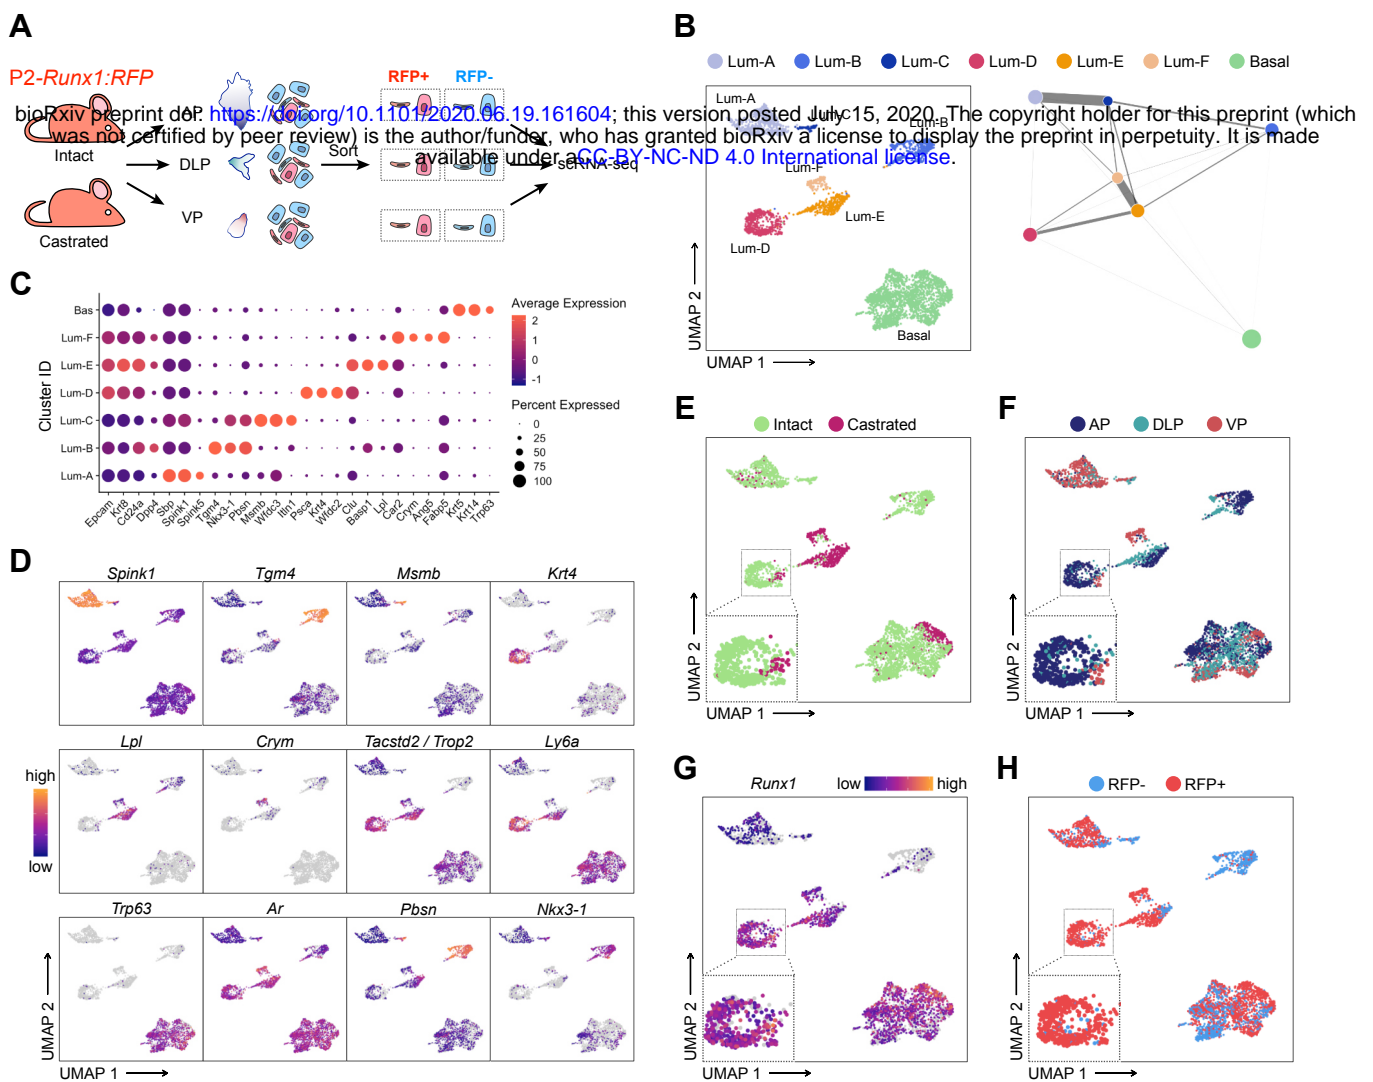

**Figure 3. scRNA-seq profiling of intact and castrated *Runx1*<sup>+</sup> cells reveals transcriptomic similarity between proximal luminal cells and castration-resistant cells.**

(A) Experimental strategy for scRNA-seq on RFP<sup>+</sup> and RFP<sup>-</sup> cells individually dissected lobes of intact and castrated prostates isolated from P2-*Runx1*:RFP reporter mice. (B) UMAP visualization (left) and graph-abstracted representation (PAGA, right) of prostate epithelial cells ( $n = 3,825$  cells from 3 independent experiments). Colors represent different clusters. In PAGA, clusters are linked by weighted edges that represent a statistical measure of connectivity. (C) Dot plot showing the expression of selected marker genes associated with each cluster. (D-H) UMAP visualization of prostate epithelial cells. Cells in D and G are colored by a gradient of log-normalized expression levels for each gene indicated. Cell colors in E represent the treatment of origin (intact, castrated), in F individual lobes of origin (AP, DLP, VP), and in H RFP FACS gate of origin (RFP<sup>+</sup>, RFP<sup>-</sup>).

**A**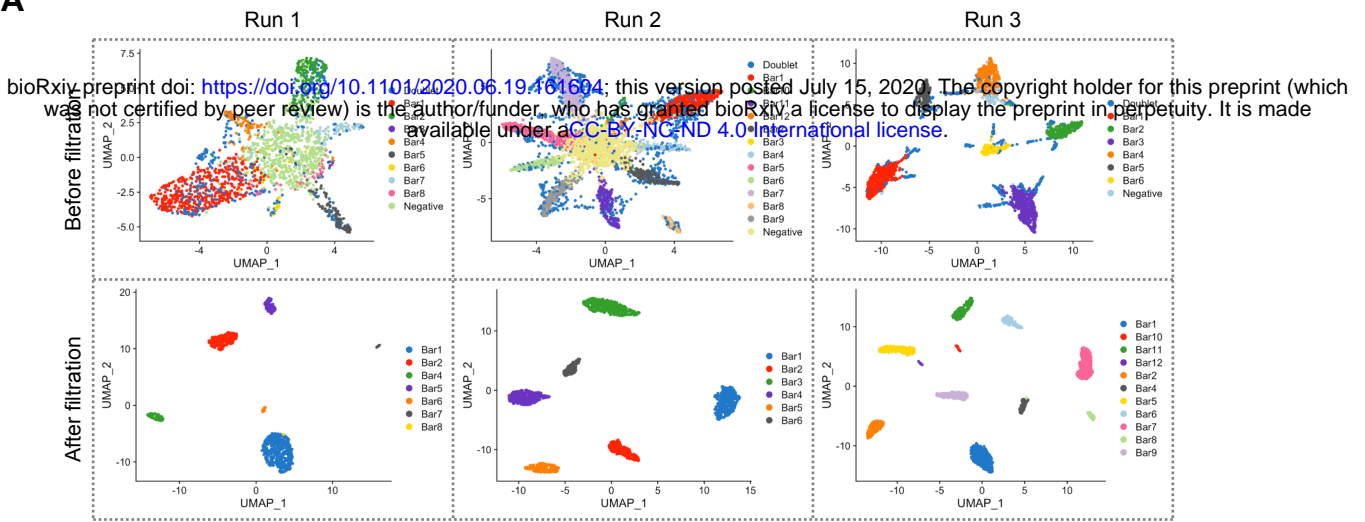**B**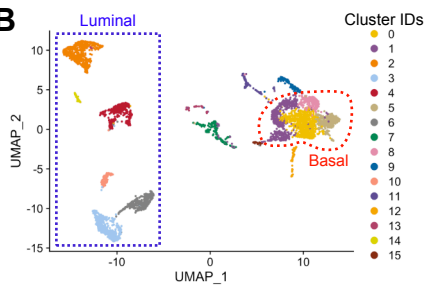**C**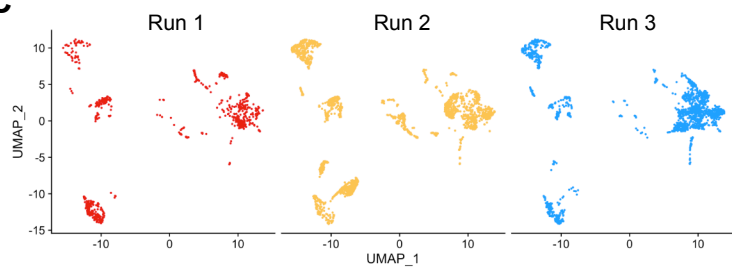**D**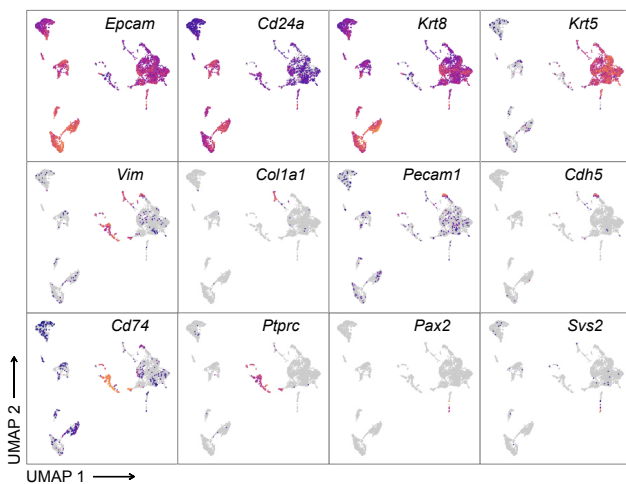**E**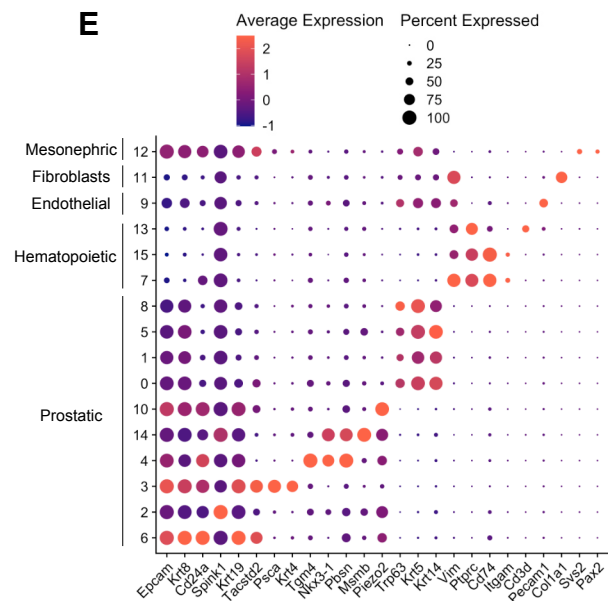

**Figure 3—figure supplement 5. Pre-processing of the scRNA-seq dataset of adult intact and castrated mouse prostates.**

(A) UMAP visualization in MULTI-seq barcodes space for each independent experiment (Run1: left, Run2: middle, Run 3: right) before (top) and after (bottom) quality control and barcode filtration (see Methods for details). (B) UMAP visualization of the integrated batch-corrected dataset ( $n = 4,499$  cells from 3 independent experiments). Colors represent different clusters. (C) UMAP visualization of the integrated batch-corrected dataset split and colored by individual experiment (Run1: left, Run2: middle, Run 3: right). (D, E) Example key marker genes used for cell type characterization. (D) UMAP visualization of the integrated batch-corrected dataset. Cells are colored by a gradient of log-normalized expression levels for each gene indicated. (E) Dot plot showing the expression of selected marker genes associated with each cluster. Cells corresponding to the prostatic clusters were kept for downstream analyses.

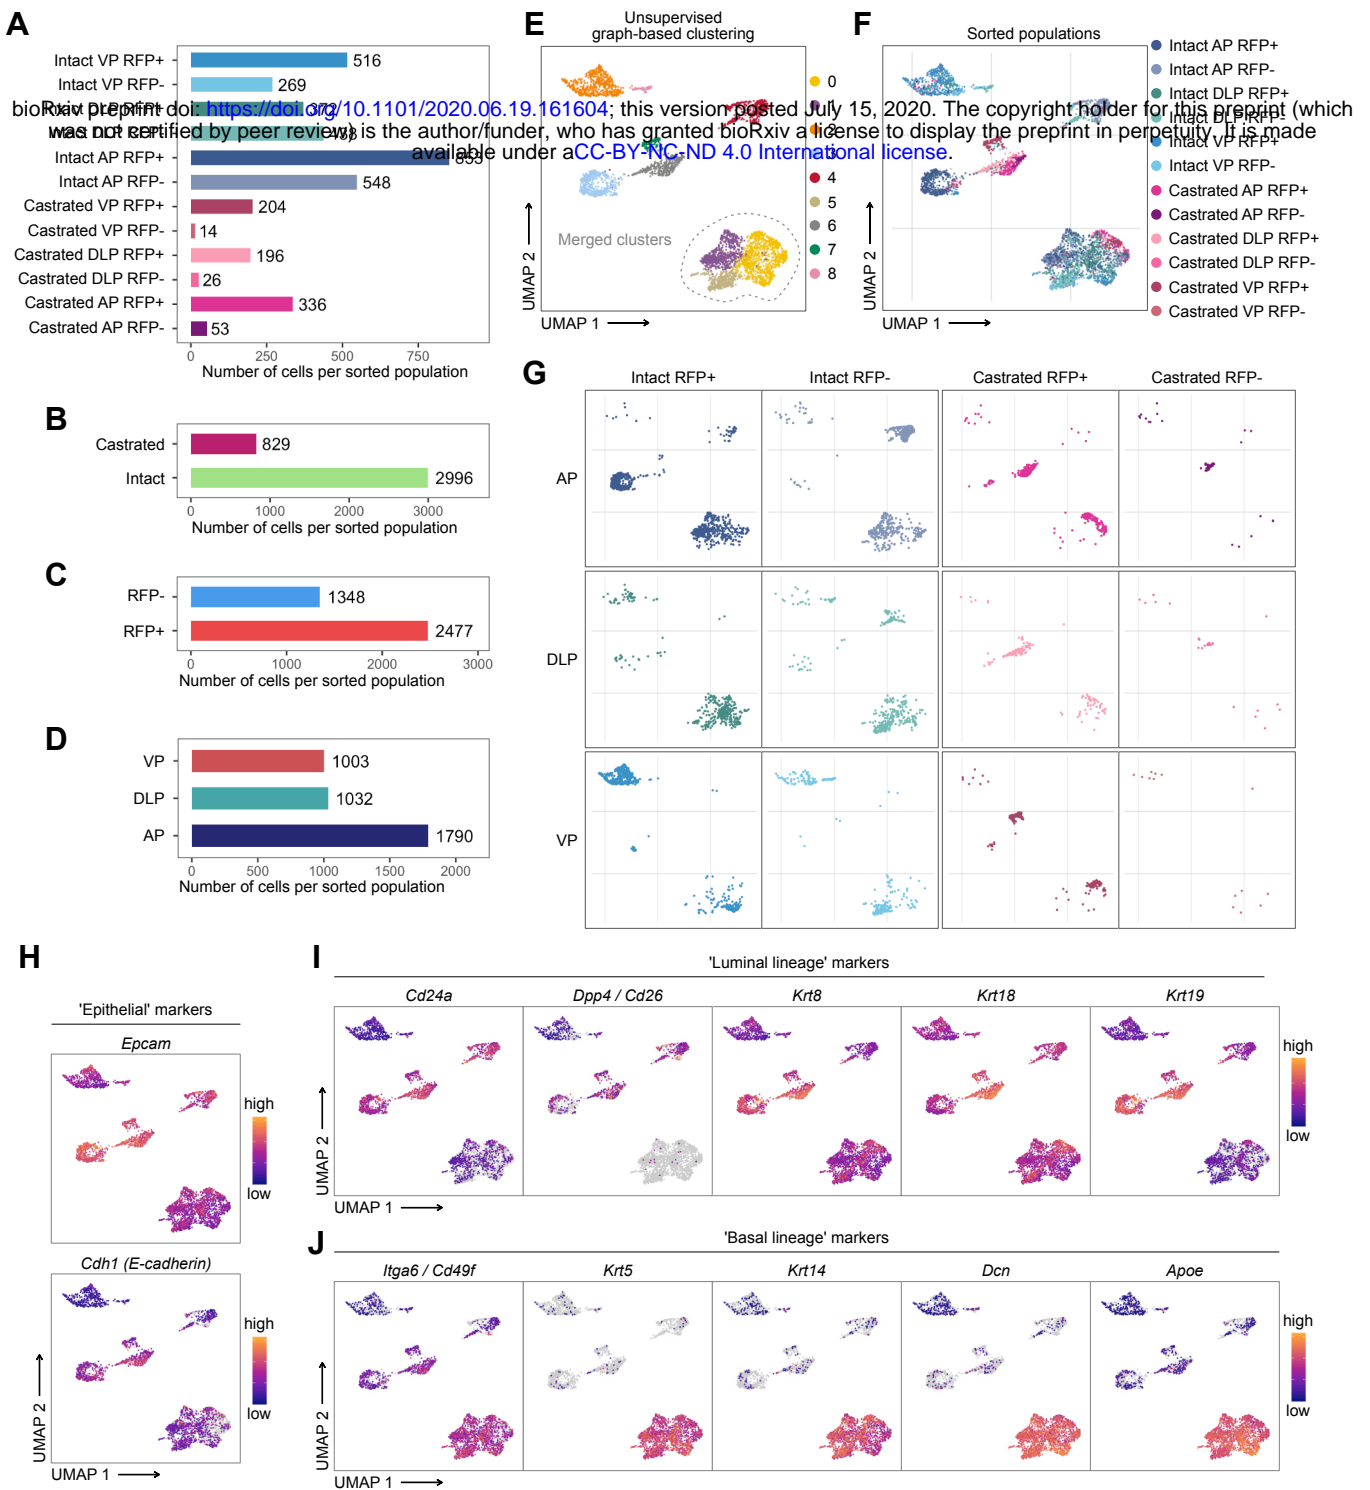

**Figure 3—figure supplement 6. Characterization of the scRNA-seq prostate epithelial subset.**

(A-D) Number of cells present in the prostate epithelial subset. In A colors correspond to phenotypic sorted populations, in B treatment of origin, in C RFP FACS gate of origin, in D individual lobes. (E, G) UMAP visualization of prostate epithelial cells. Cells in E are colored by clusters. Clusters 0, 1 and 5 were merged together. In F and G colors represent phenotypic sorted populations. (H-J) Cells are colored by a gradient of log-normalized expression levels for each gene. Canonical epithelial markers are shown in H, luminal lineage markers in I, and basal lineage markers in J.



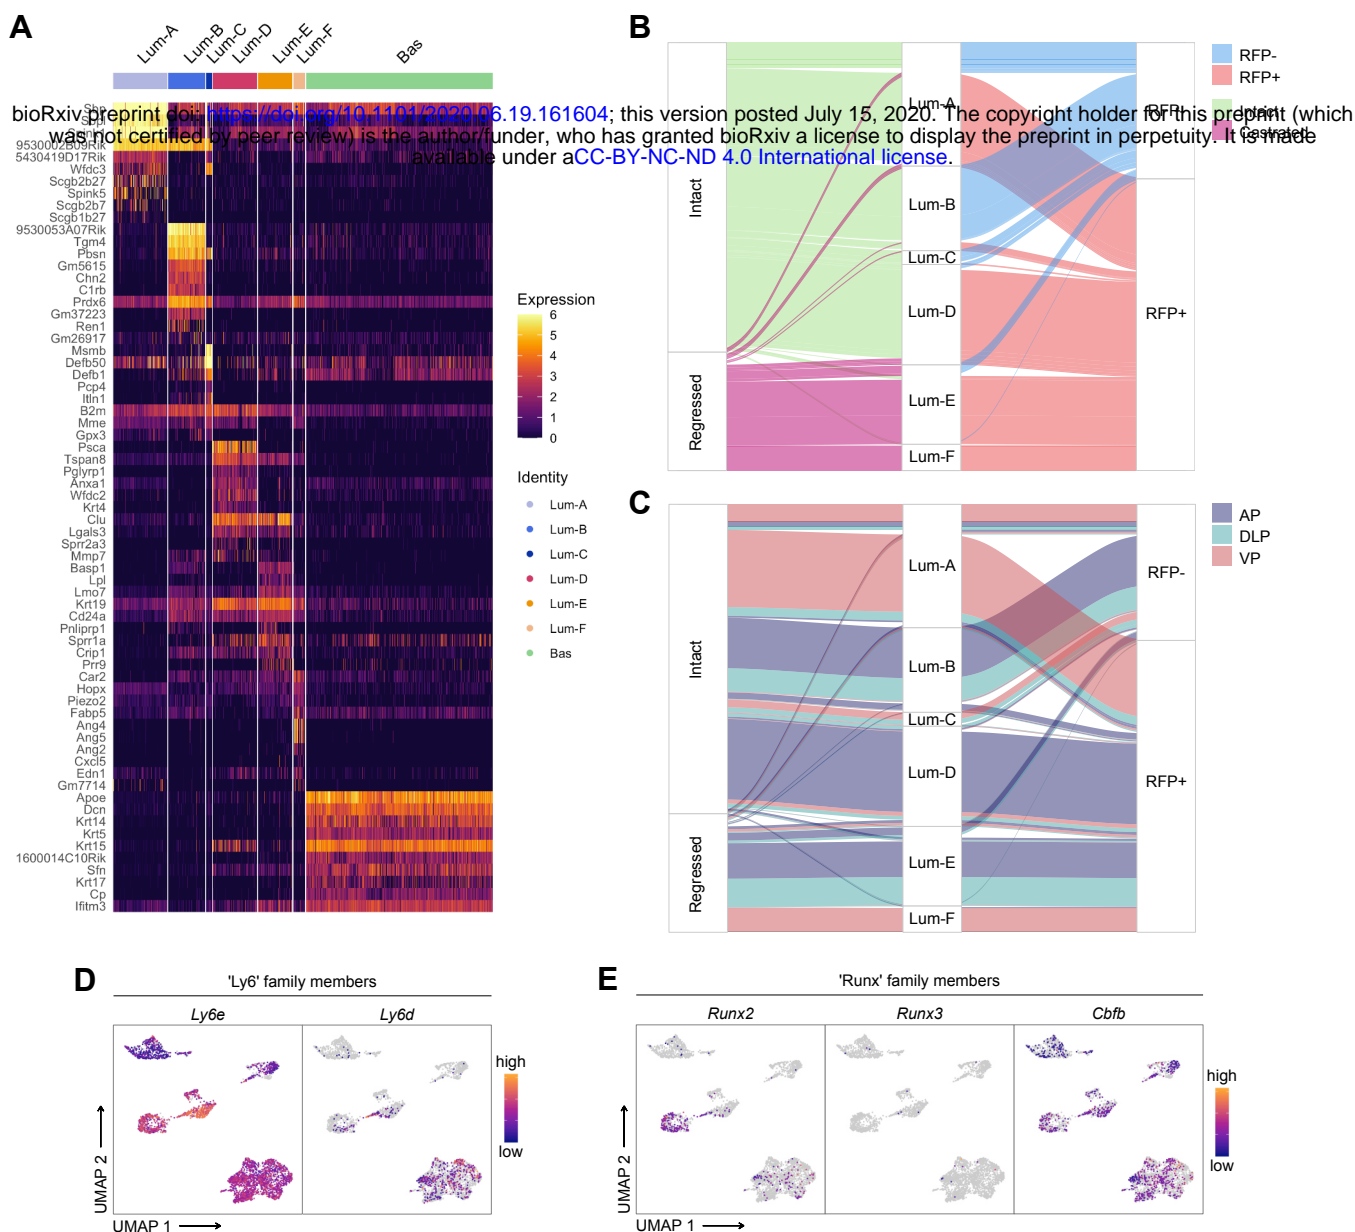

**Figure 3—figure supplement 7. Characterization of the scRNA-seq prostate epithelial dataset.**

(A) Heatmap of the 10 most differentially upregulated genes per cluster. (B, C) Sankey diagrams summarizing the proportion of cells and between phenotypic groups. (D, E) Cells are colored by a gradient of log-normalized expression levels for each gene. (D) shows the expression of Ly6 family members, and in E RUNX family members are shown.

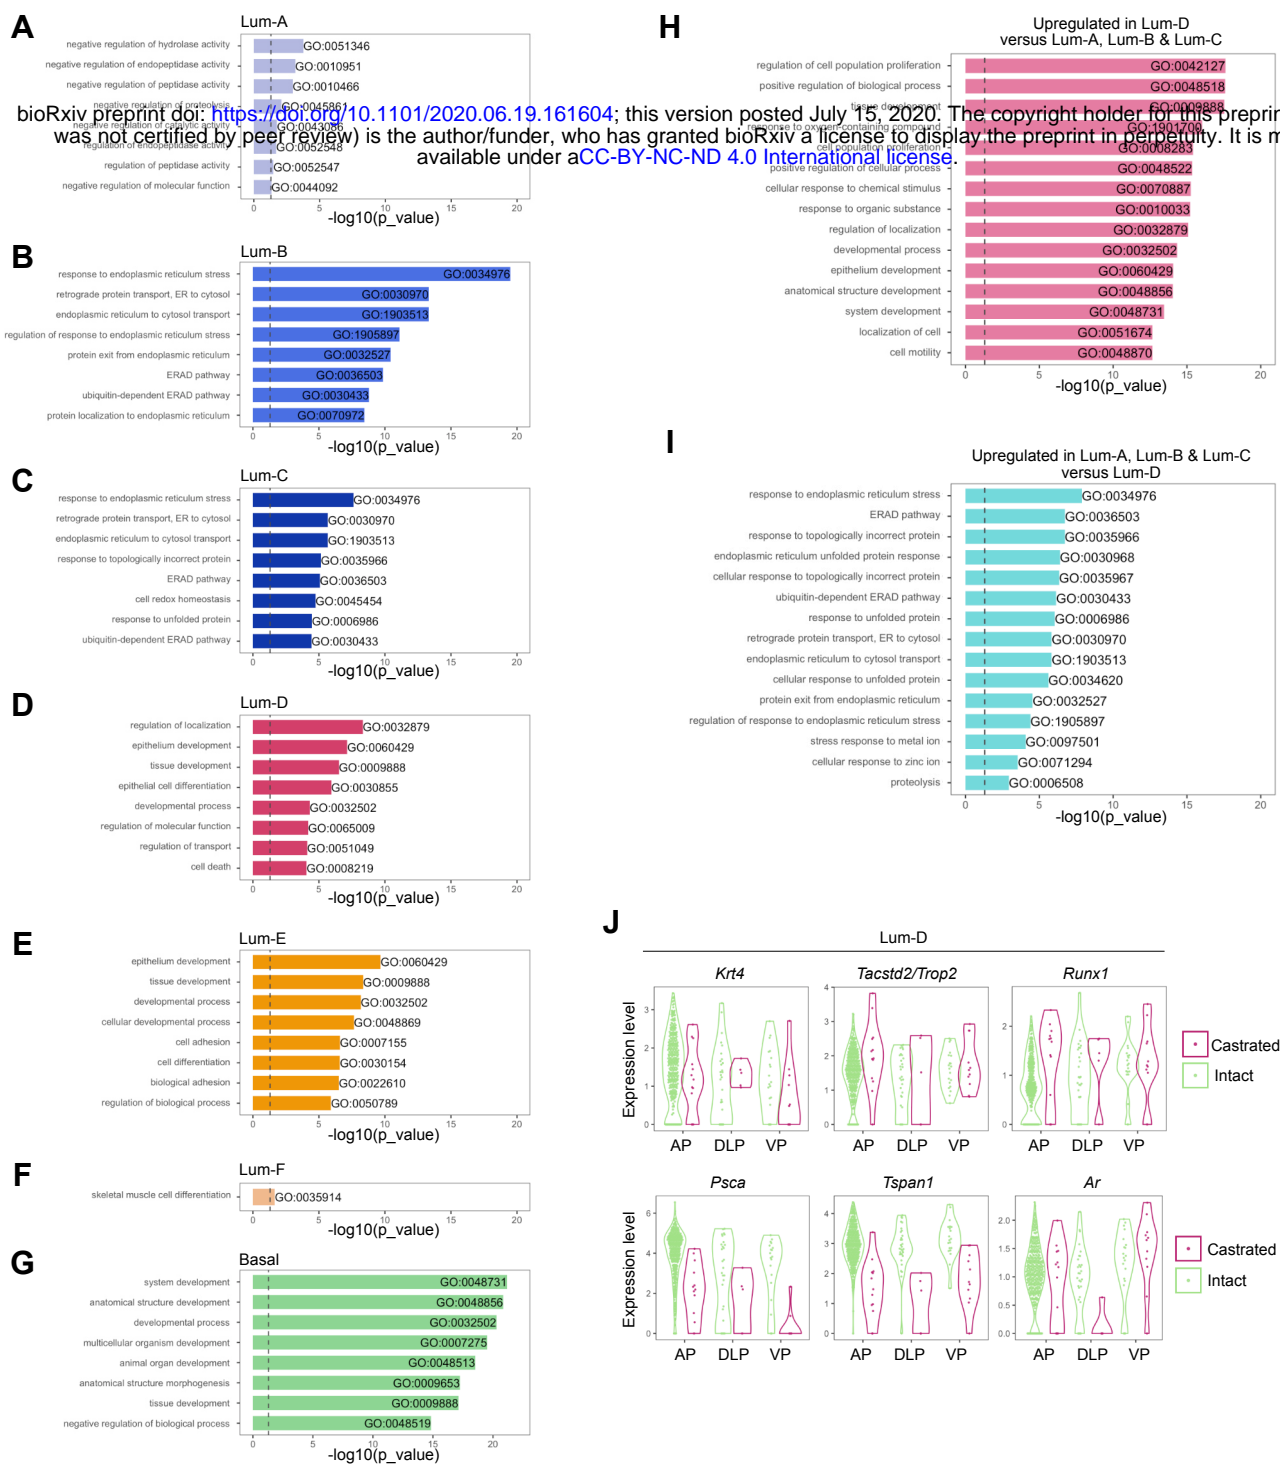

**Figure 3—figure supplement 8. Gene Ontology and differential expression analysis within the scRNA-seq prostate epithelial dataset.**

Bar plots of the 8 most significantly ( $g$ :Profiler adjusted  $p$ -value  $< 0.05$ ) enriched gene ontology (GO) terms (GO:BP, Biological Processes) using the list of differentially upregulated genes specific to (A) Lum-A, (B) Lum-B, (C) Lum-C, (D) Lum-D, (E) Lum-E, (F) Lum-F, and (G) Basal clusters. (H, I) 15 most enriched GO terms ( $g$ :Profiler adjusted  $p$ -value  $< 0.05$ ) for genes upregulated in the Lum-D cluster against combined Lum-A, Lum-B and Lum-C clusters in H. Results of the opposite comparison are shown in I. (J) Violin plots showing the expression levels of specific genes within the Lum-D cluster. Data are split and colored by treatment for each lobe. The expression of *Krt4*, *Tacstd2/Trop2* and *Runx1* does not vary upon treatment, while Androgen Receptor (AR) regulated genes such as *PscA* and *Tspan1* are downregulated after castration.

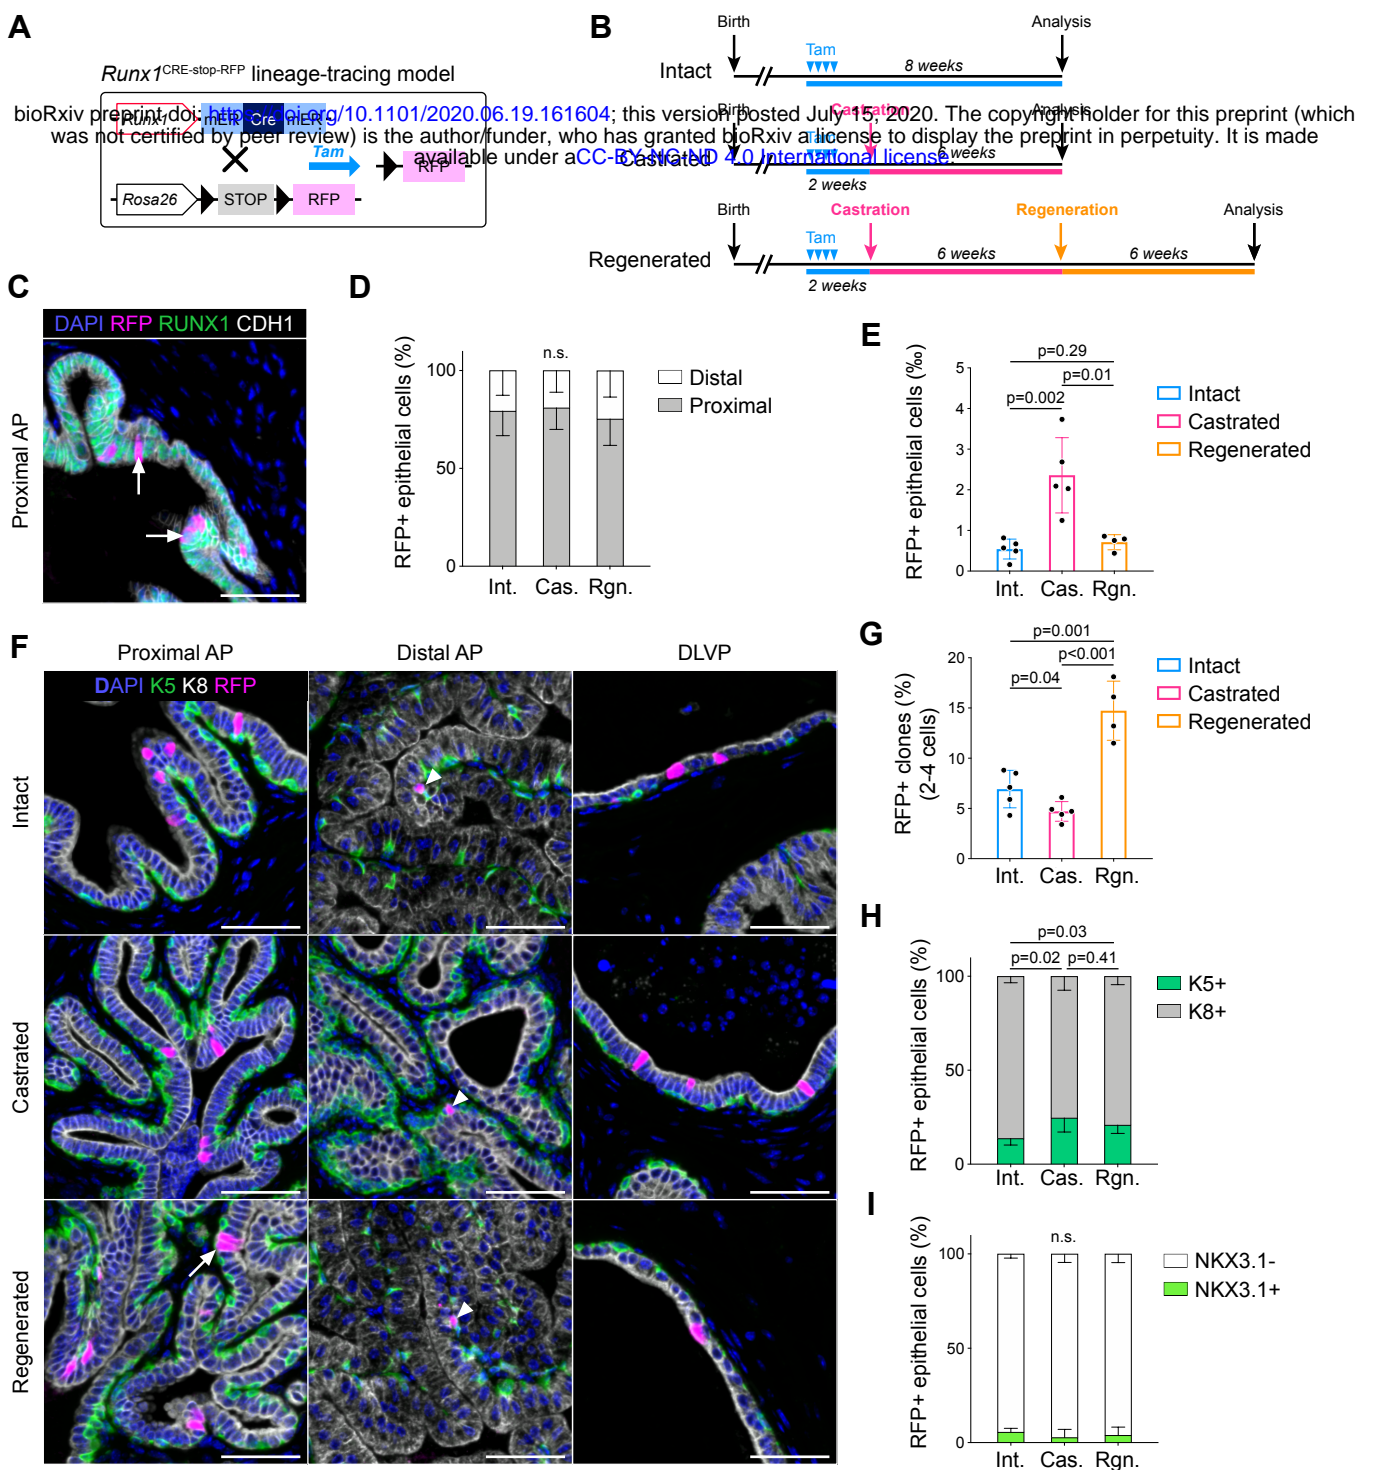

**Figure 4. Lineage-tracing of *Runx1* expressing cells establishes the intrinsic castration-resistant properties of the proximal luminal lineage.**

(A) Schematic summary of the genetic lineage tracing system employed. (B) Experimental strategy for lineage-tracing experiments. (C) Co-immunostaining of RFP, RUNX1, CDH1 in the proximal AP. Arrows indicate RFP labelled RUNX1<sup>+</sup> cells. Scale bar: 50µm. (D) Quantification of % of epithelial RFP<sup>+</sup> cells in proximal and distal regions of the prostate in intact (*n* = 5), castrated (*n* = 4) and regenerated (*n* = 4) mice. (E) Quantification of % of epithelial RFP<sup>+</sup> cells in intact (*n* = 5), castrated (*n* = 5) and regenerated (*n* = 4) mice. (F) Co-immunostaining of RFP, K5, K8 in the proximal AP, distal AP, and DLVP (DLP + VP). Arrowheads indicate RFP labelled basal cells (K5<sup>+</sup>) found in distal AP, the white arrow indicates a luminal (K8<sup>+</sup>) RFP<sup>+</sup> clone made of 2 cells. Scale bar: 50µm. (G) Quantification of % of epithelial RFP<sup>+</sup> clones comprising between 2 to 4 cells in intact (*n* = 5), castrated (*n* = 5) and regenerated (*n* = 4) mice. (H, I) Quantification of % of RFP<sup>+</sup> cells being K5<sup>+</sup> or K8<sup>+</sup> in H, or NKX3.1<sup>+</sup> or NKX3.1<sup>-</sup> in I, in intact (*n* = 5), castrated (*n* = 5) and regenerated (*n* = 4) mice. Int: Intact, Cas: Castrated, Rgn: Regenerated.



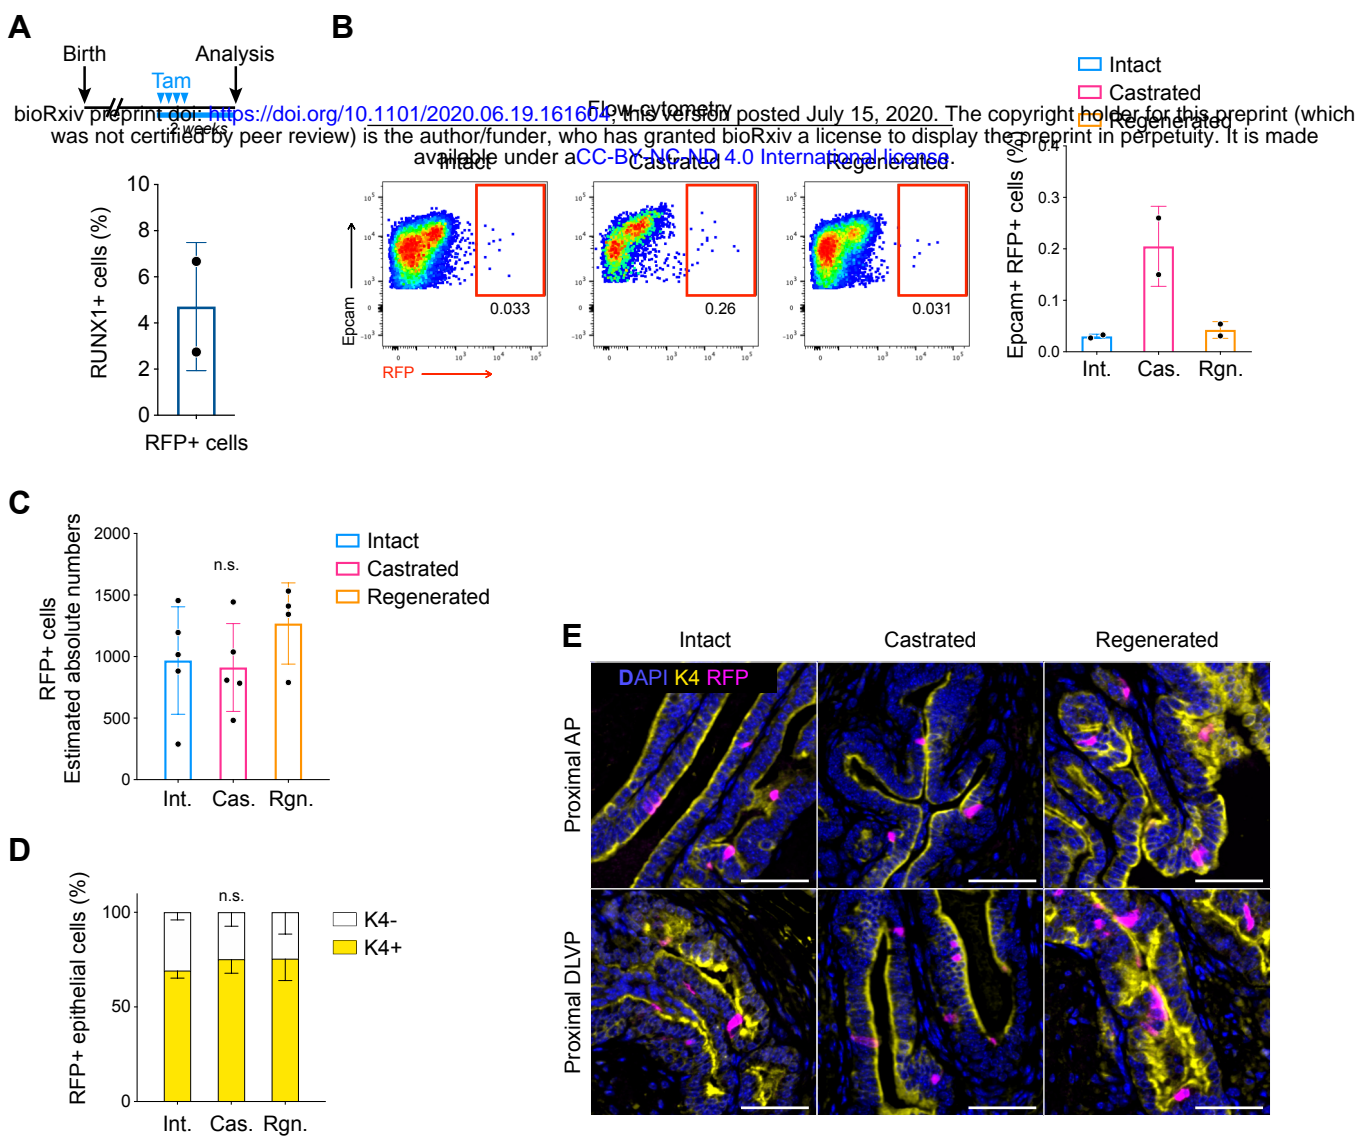

**Figure 4—figure supplement 9. Lineage tracing of RUNX1 expressing cells labelled in intact mice.**

(A) Scheme of the tamoxifen labelling strategy to evaluate the labelling efficiency of *Runx1* expressing cells. (B) Flow-cytometry analysis of intact ( $n = 2$ ), castrated ( $n = 2$ ), and regenerated ( $n = 2$ ) *Runx1*<sup>CRE-stop-RFP</sup> mice, and corresponding quantification of the percentage of RFP<sup>+</sup> cells in the epithelial EPCAM<sup>+</sup> fraction. (C) Estimated absolute number of epithelial RFP<sup>+</sup> cells in intact ( $n = 5$ ) and castrated ( $n = 5$ ) and regenerated ( $n = 4$ ) prostates based on IHC quantifications. Int: Intact, Cas: Castrated, Rgn: Regenerated. (D) Quantification of % of epithelial RFP<sup>+</sup> cells being K4<sup>+</sup> or K4<sup>-</sup> in intact ( $n = 3$ ), castrated ( $n = 4$ ) and regenerated ( $n = 5$ ) mice. (E) Co-immunostaining showing the enrichment of K4<sup>+</sup> RFP labelled cells in the proximal region of the AP (top) and DLVP (bottom) prostate lobes. Scale bar: 50µm.

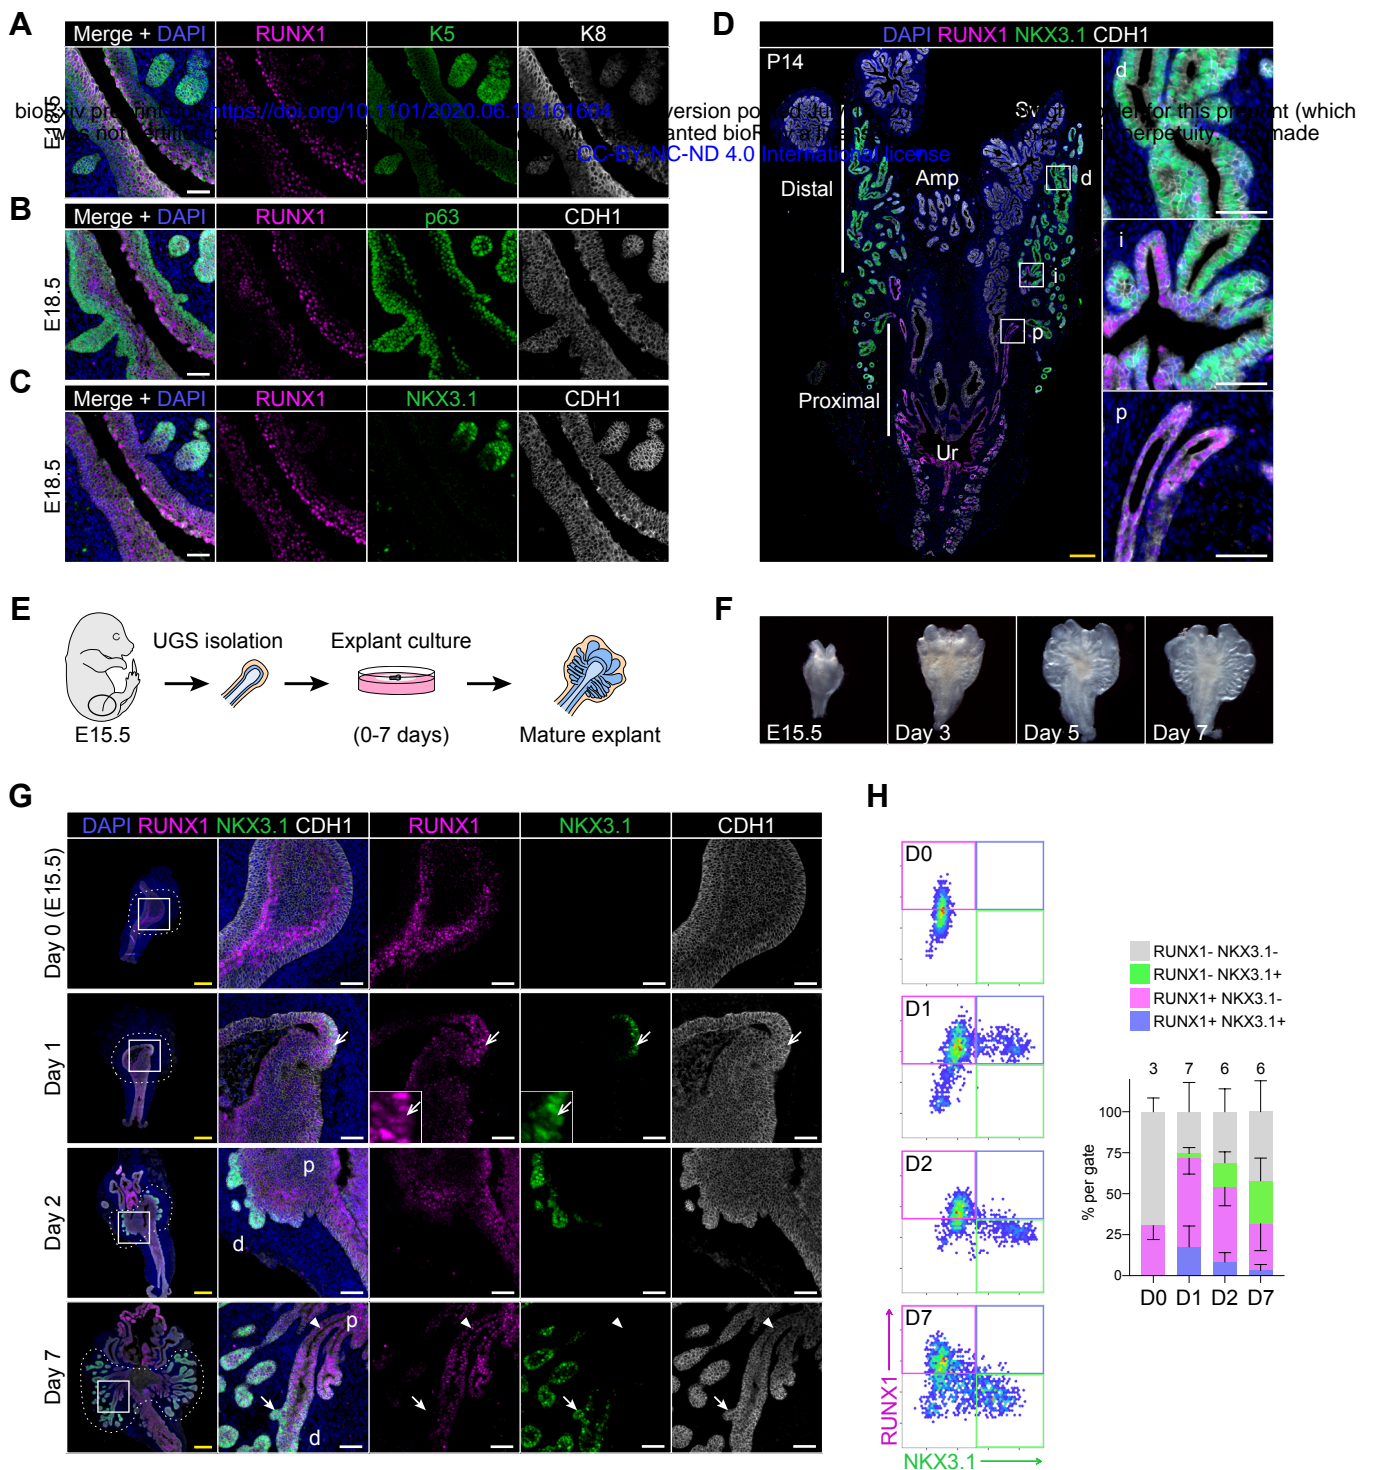

**Figure 5. RUNX1 marks proximal cells during embryonic prostate development.**

(A-C) Co-immunostainings of the mouse urogenital sinus at E18.5 for RUNX1, K5, K8 in **A**, RUNX1, p63, CDH1 in **B**, RUNX1, NKX3.1, CDH1 in **C**. Scale bar: 50 $\mu$ m. (**D**) Co-immunostainings of RUNX1, NKX3.1, CDH1 at postnatal (P) day 14. Higher magnification images of (p) proximal, (i) intermediate, and (d) distal regions are shown. Scale bars: 200 $\mu$ m (yellow) and 50 $\mu$ m (white). Amp: ampullary gland; Sv: seminal vesicles; Ur: urethra; p: proximal; i: intermediate; d: distal. (**E**) Scheme of the protocol to culture *ex vivo* explants of mouse UGS harvested at E15.5. (**F**) Representative images of UGS explants at E15.5 (day 0), day 3, day 5 and day 7 of culture showing the formation of premature prostate buds. (**G**) Co-immunostaining of RUNX1, NKX3.1, CDH1 in UGS explants harvested at day 0, day 1, day 2 and day 7. Higher magnification images of each square (left) are shown for each time point. Chevron arrows show RUNX1<sup>+</sup> NKX3.1<sup>+</sup> cells, closed arrows indicate RUNX1<sup>-</sup> NKX3.1<sup>+</sup> cells, arrowheads show RUNX1<sup>+</sup> NKX3.1<sup>-</sup> cells. Scale bars: 200 $\mu$ m (yellow) and 50 $\mu$ m (white). (**H**) Quantification of RUNX1 and NKX3.1 nuclear intensity (log<sub>10</sub>) in CDH1<sup>+</sup> epithelial cells of UGS explants by QBIC. Quantification was performed within the boundaries delimited in **G** by dotted lines, at day 0 ( $n = 3$  explants), day 1 ( $n = 7$  explants), day 2 ( $n = 6$  explants) and day 7 ( $n = 6$  explants).

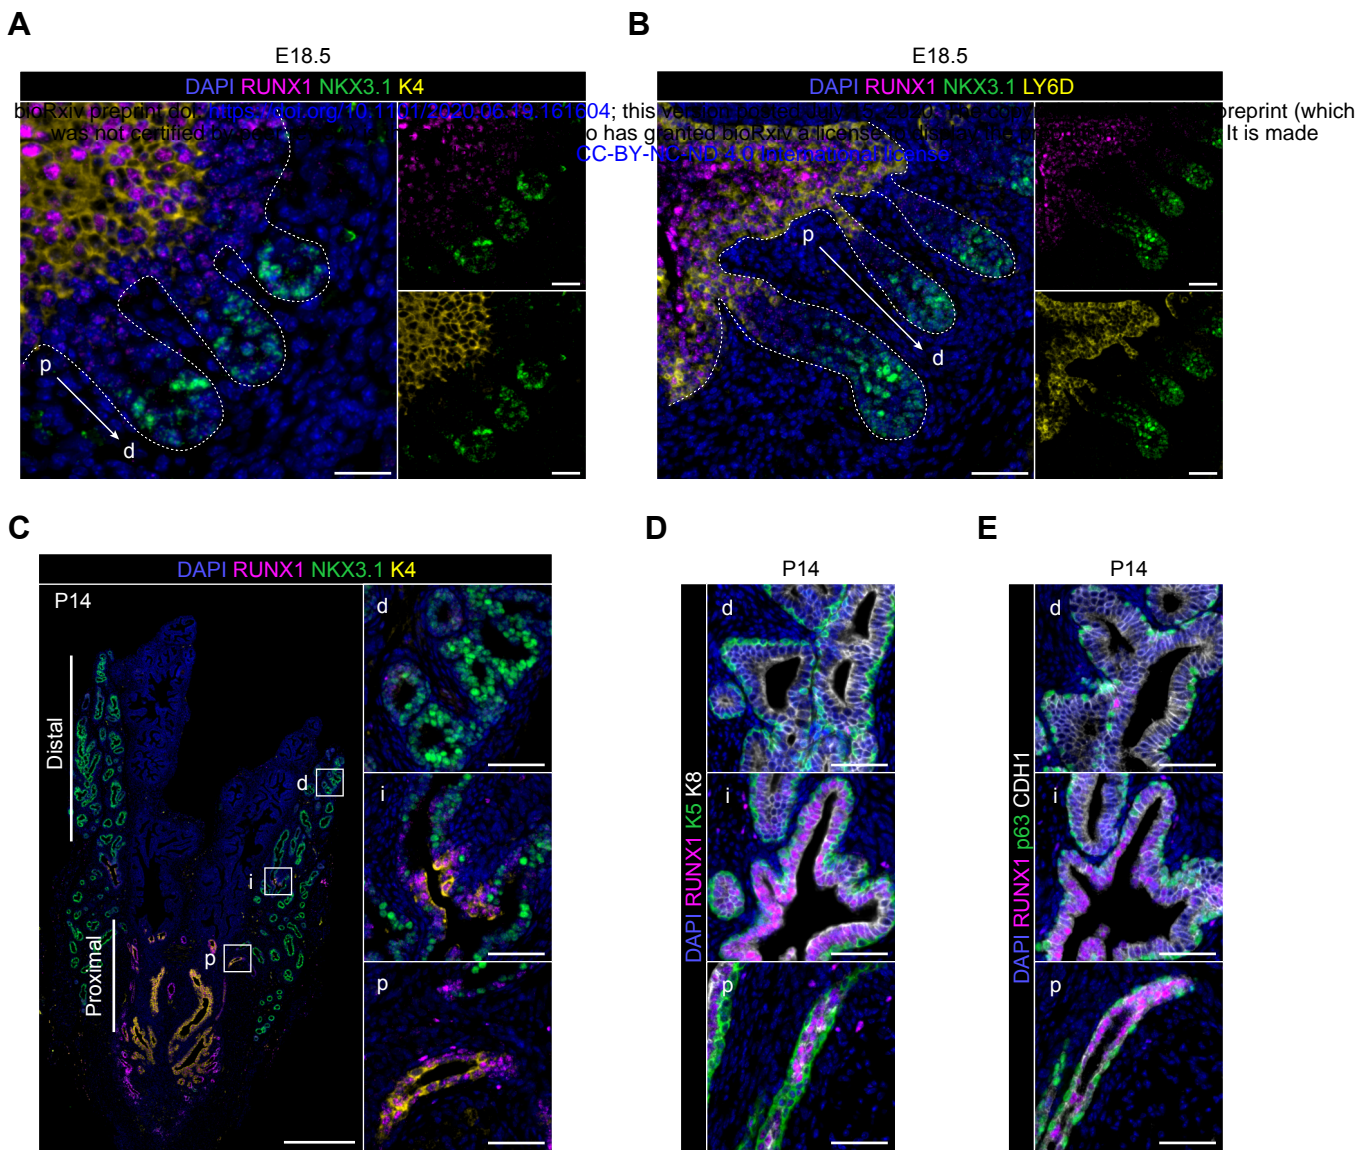

**Figure 5—figure supplement 10. Characterization of RUNX1 expression during prostate development *in vivo*.**

(A) Co-immunostainings of the mouse urogenital sinus at E18.5 for RUNX1, NKX3.1, K4. p: proximal, d: distal. Scale bar: 50µm. Dotted lines indicate the urogenital epithelium. (B) Co-immunostainings of the mouse urogenital sinus at E18.5 for RUNX1, NKX3.1, LY6D. p: proximal, d: distal. Scale bar: 50µm. (C) Co-immunostaining of RUNX1, NKX3.1, K4 at postnatal (P) day 14. Higher magnification images of (p) proximal, (i) intermediate, and (d) distal regions are shown. Scale bars: 200µm (yellow) and 50µm (white). (D, E) Co-immunostainings at postnatal P14 for RUNX1, K5, K8 in B RUNX1, p63, CDH1 in C. p: proximal, i: intermediate, d: distal. Scale bar: 50µm.



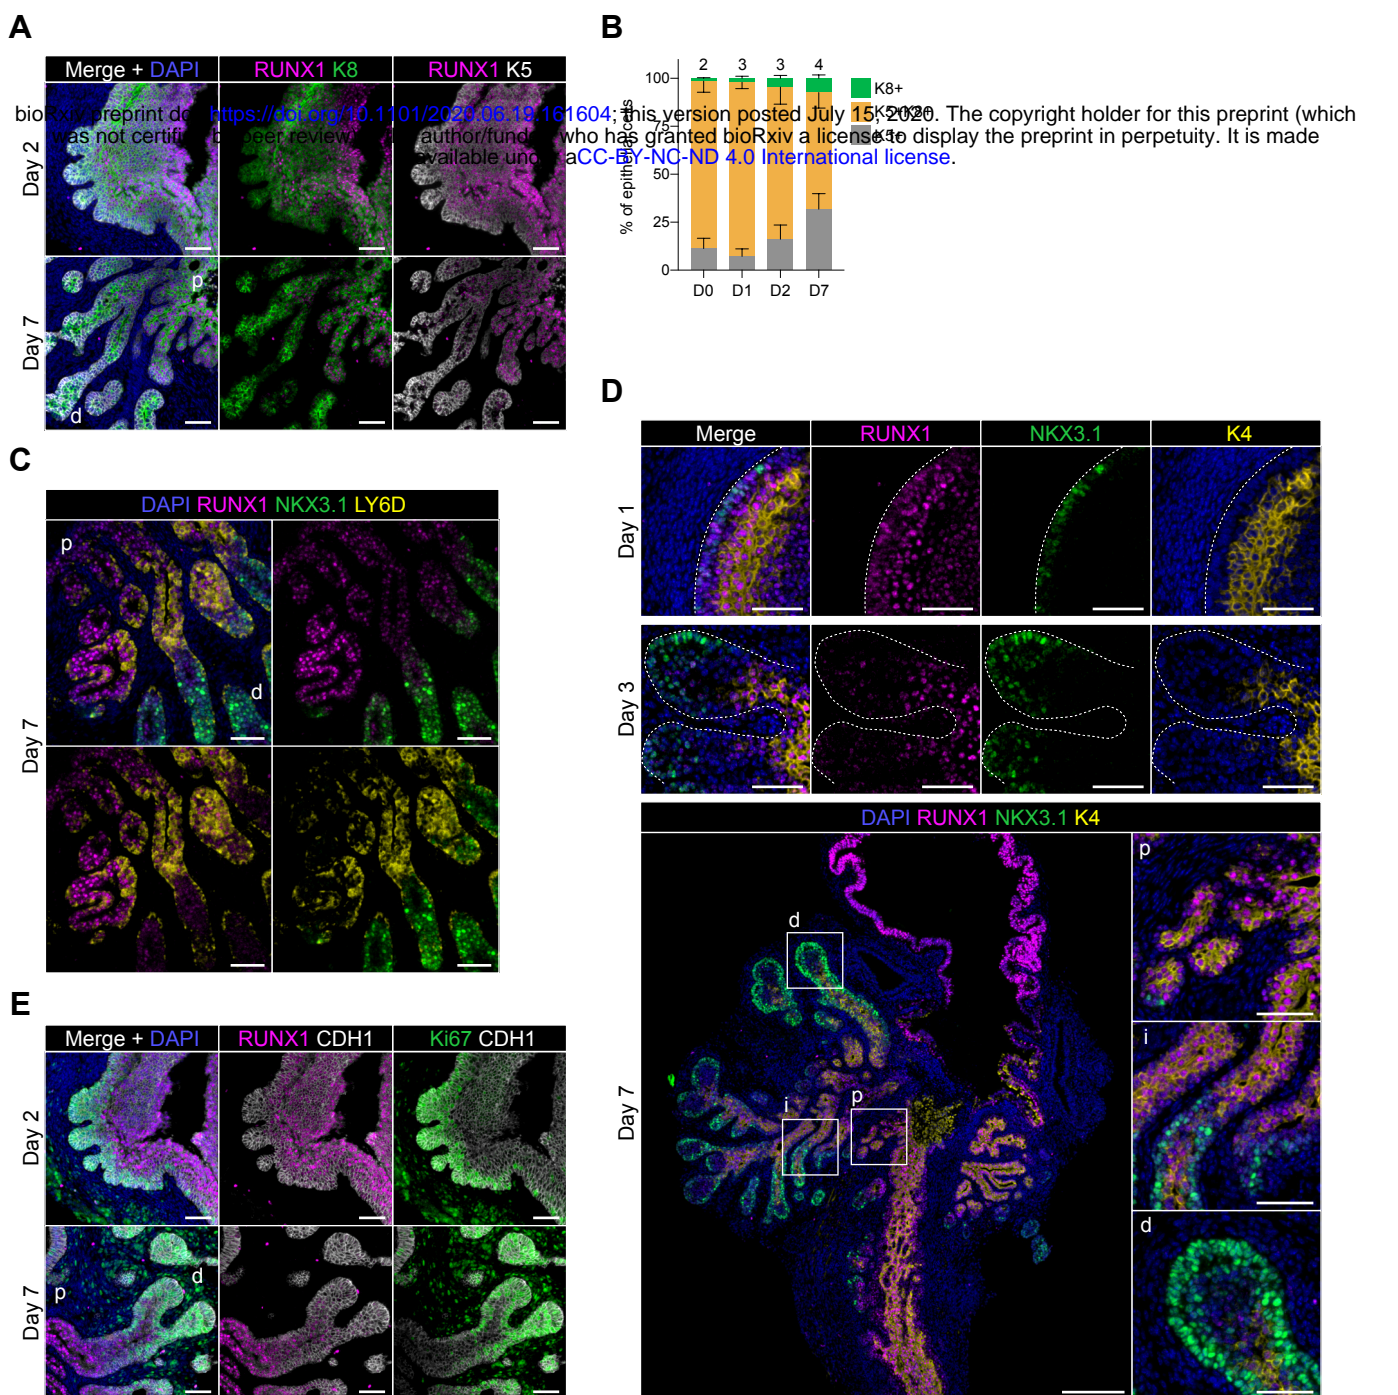

**Figure 5—figure supplement 11. Characterization of RUNX1 expression during prostate development in UGS explant cultures.**

(A) Co-immunostaining of RUNX1, K5, K8 in UGS explants harvested at day 2 and day 7. p: proximal, d: distal. Scale bar: 50µm. (B) Quantification of the percentage of K5<sup>+</sup>, K8<sup>+</sup>, K5<sup>+</sup> K8<sup>+</sup> cells during UGS explant cultures at day 0 (*n* = 2 explants), day 1 (*n* = 3 explants), day 2 (*n* = 3 explants), day 7 (*n* = 4 explants), showing a progressive reduction in the proportion of K5<sup>+</sup> K8<sup>+</sup> double positive cells. (C) Co-immunostaining of RUNX1, NKX3.1, LY6D in UGS explants harvested at day 7. p: proximal, d: distal. Scale bar: 50µm. (D) Co-immunostaining of RUNX1, NKX3.1, K4 in UGS explants harvested at day 1 (top), 3 (middle) and 7 (bottom). Higher magnification images of (p) proximal, (i) intermediate, and (d) distal regions are shown for day 7. Scale bars: 200µm (yellow) and 50µm (white). Dotted lines indicate the urogenital epithelium. (E) Co-immunostaining of RUNX1, Ki67, CDH1 in UGS explants harvested at day 2 and day 7. p: proximal, d: distal. Scale bar: 50µm.

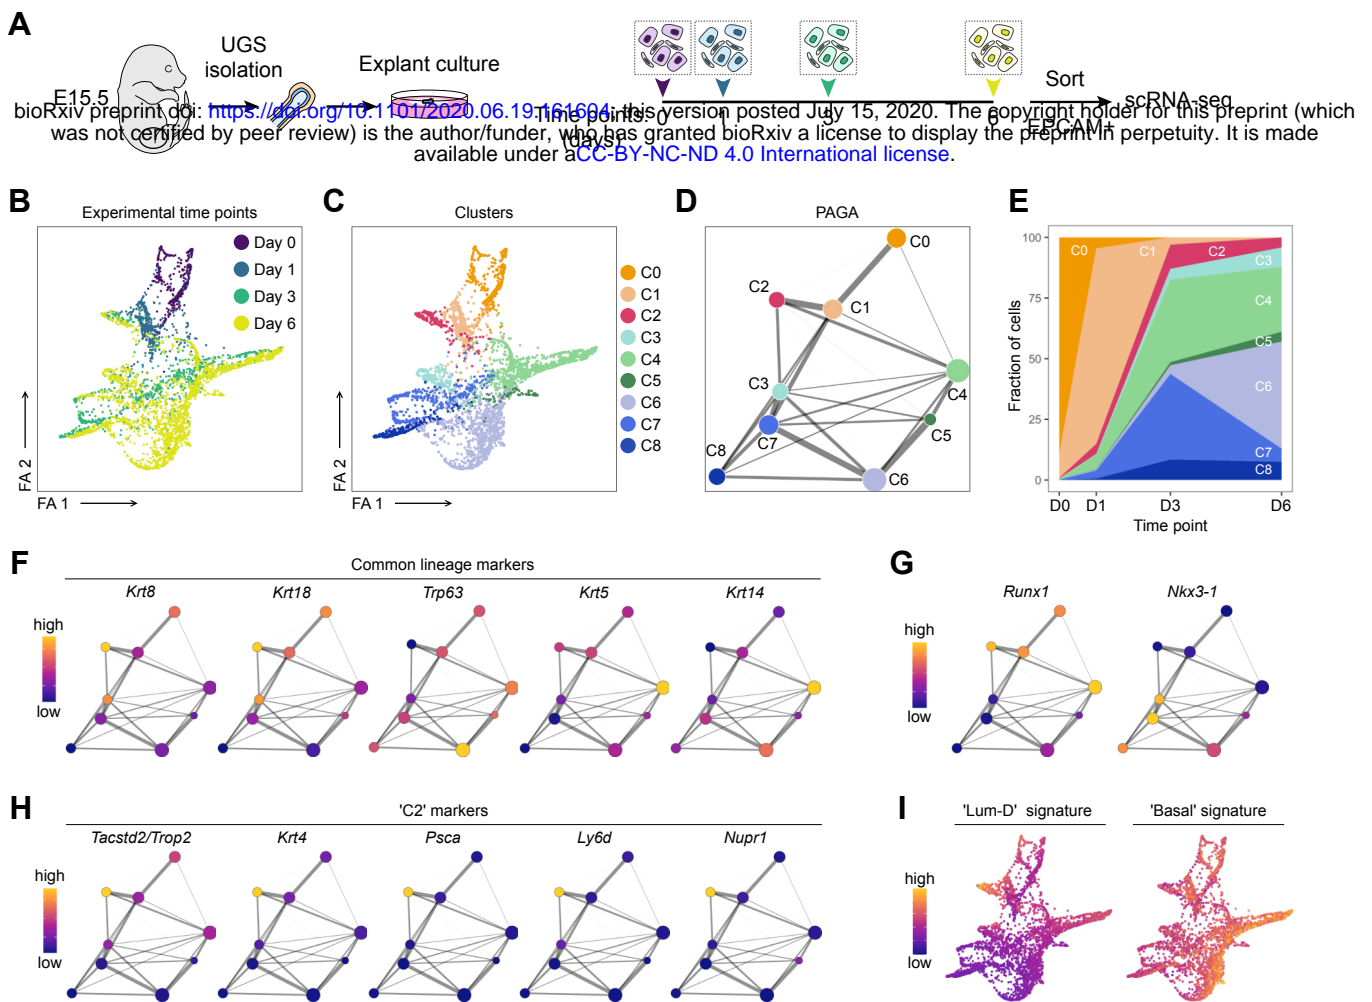

**Figure 6. scRNA-seq of UGS explant cultures shows specification of the proximal luminal lineage during embryonic prostate development.**

**(A)** Experimental strategy for scRNA-seq of UGS explant cultures at day 0, day 1, day 3 and day 6. **(B, C)** Force directed visualization of the developing prostatic epithelium in UGS explant cultures. In **B** cells are colored by experimental time points, and in **C** cells are colored by clusters. **(D)** PAGA representation of the clusters as in **C**. Weighted edges between cluster nodes represent a statistical measure of connectivity. **(E)** Fraction of cells per cluster at each experimental time point, displaying a progressive cellular diversification. **(F-H)** PAGA representations with cluster nodes colored by a gradient representing the mean log-normalized expression levels of each gene. **(I)** Force directed visualization of the developing prostatic epithelium in UGS explant cultures. Color gradient represents AUC scores per cell. Per-cell AUC scores were calculated using the 'AUCell' package. Gene signatures for 'Lum-D' (left) and 'Basal' (right) were generated using the list of differentially upregulated genes previously obtained from our adult mouse prostate clusters.

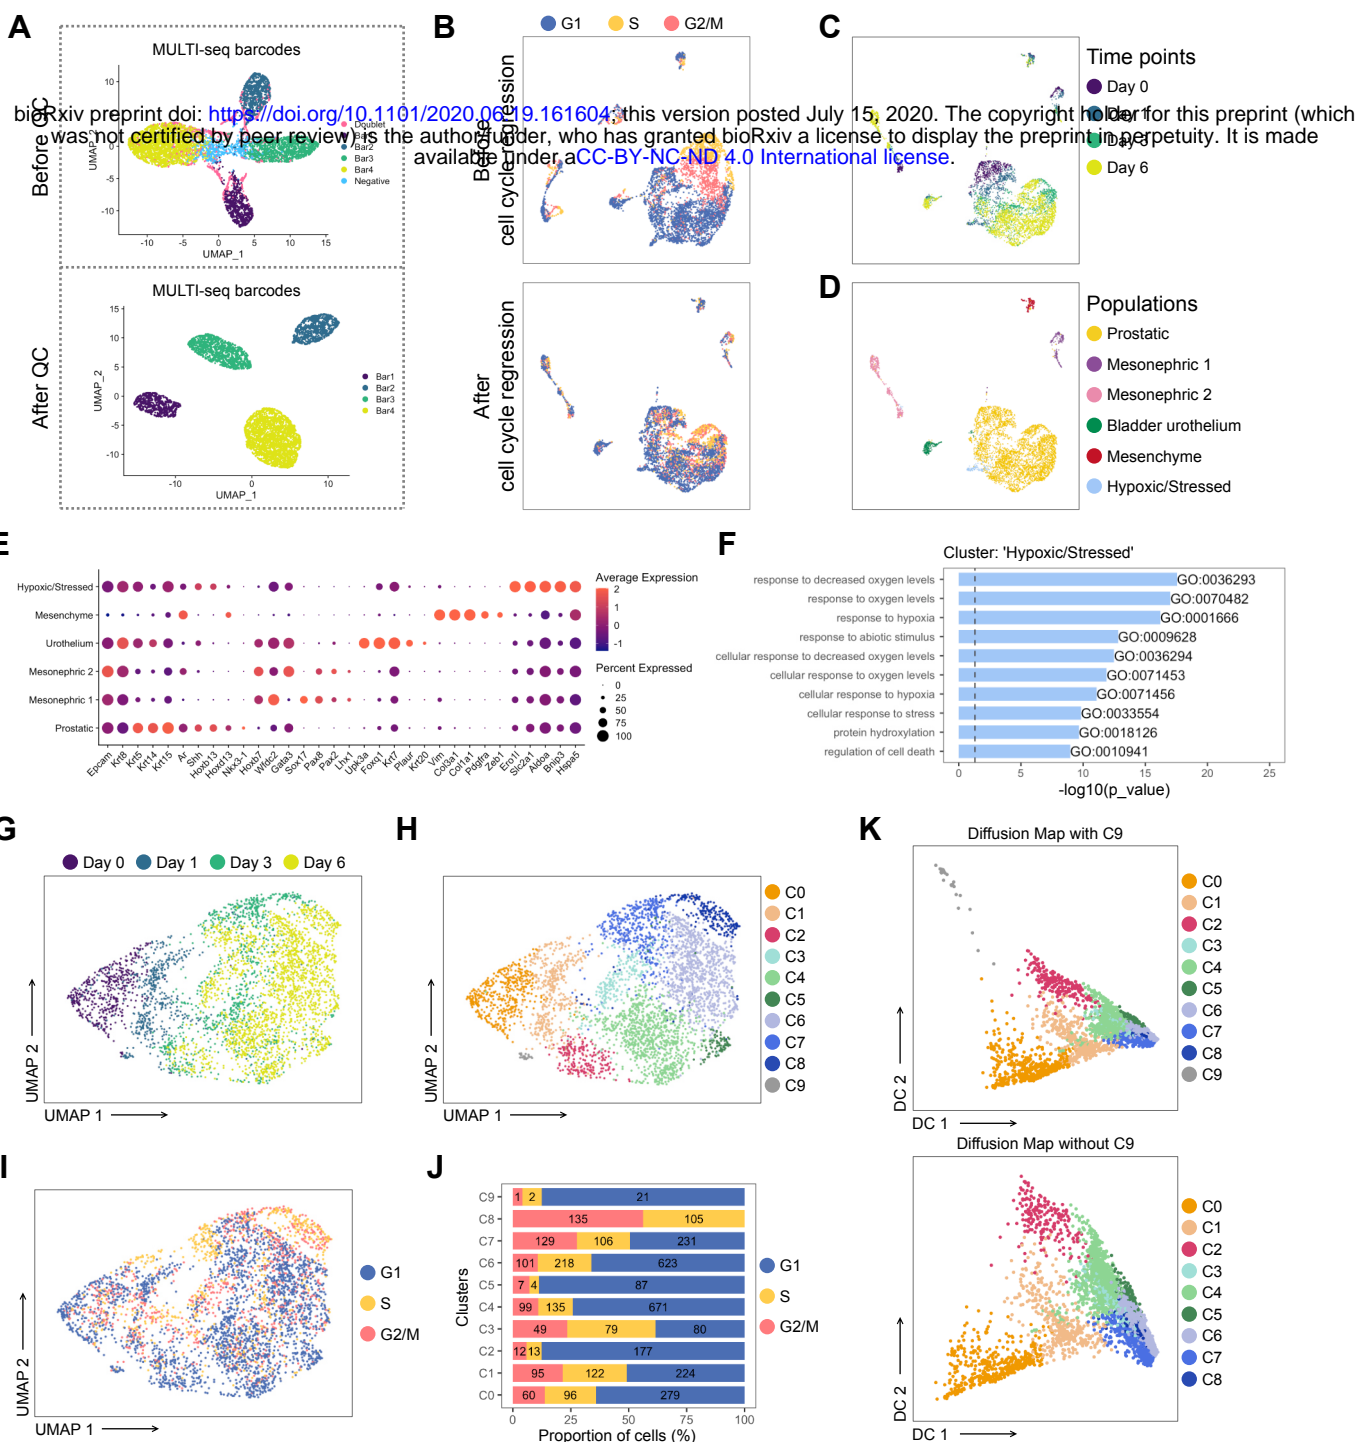

**Figure 6—figure supplement 12. Pre-processing of the scRNA-seq dataset of UGS explant cultures.**

(A) UMAP visualization in MULTI-seq barcodes space before (top) and after (bottom) quality control and barcode filtration (see Methods for details). (B) UMAP visualization of the dataset colored by estimated cell cycle phase (top). Due to the strong underlying impact on clustering, the cell cycle effect was regressed out (bottom). (C, D) UMAP visualization of the dataset colored in C by experimental time point and in D by labeled populations. (E) Dot plot showing the expression of selected marker genes associated with each labelled population. (F) Bar plots of the 10 most significantly (g:Profiler adjusted p-value < 0.05) enriched gene ontology (GO) terms (GO:BP, Biological Processes) on the differentially upregulated genes specific to the 'Hypoxic/Stressed' cluster. (G-I) UMAP visualization of the prostatic subset (from D), labelled by time points in G, clusters in H, estimated cell cycle phase in I. (J) Percentage of cells in the different estimated cell cycle phases in each clusters. (K) Diffusion maps representation of the prostatic subset using the first 2 diffusion components with (top) and without (bottom) C9. C9 was excluded for downstream analyses due to its outlying profile.



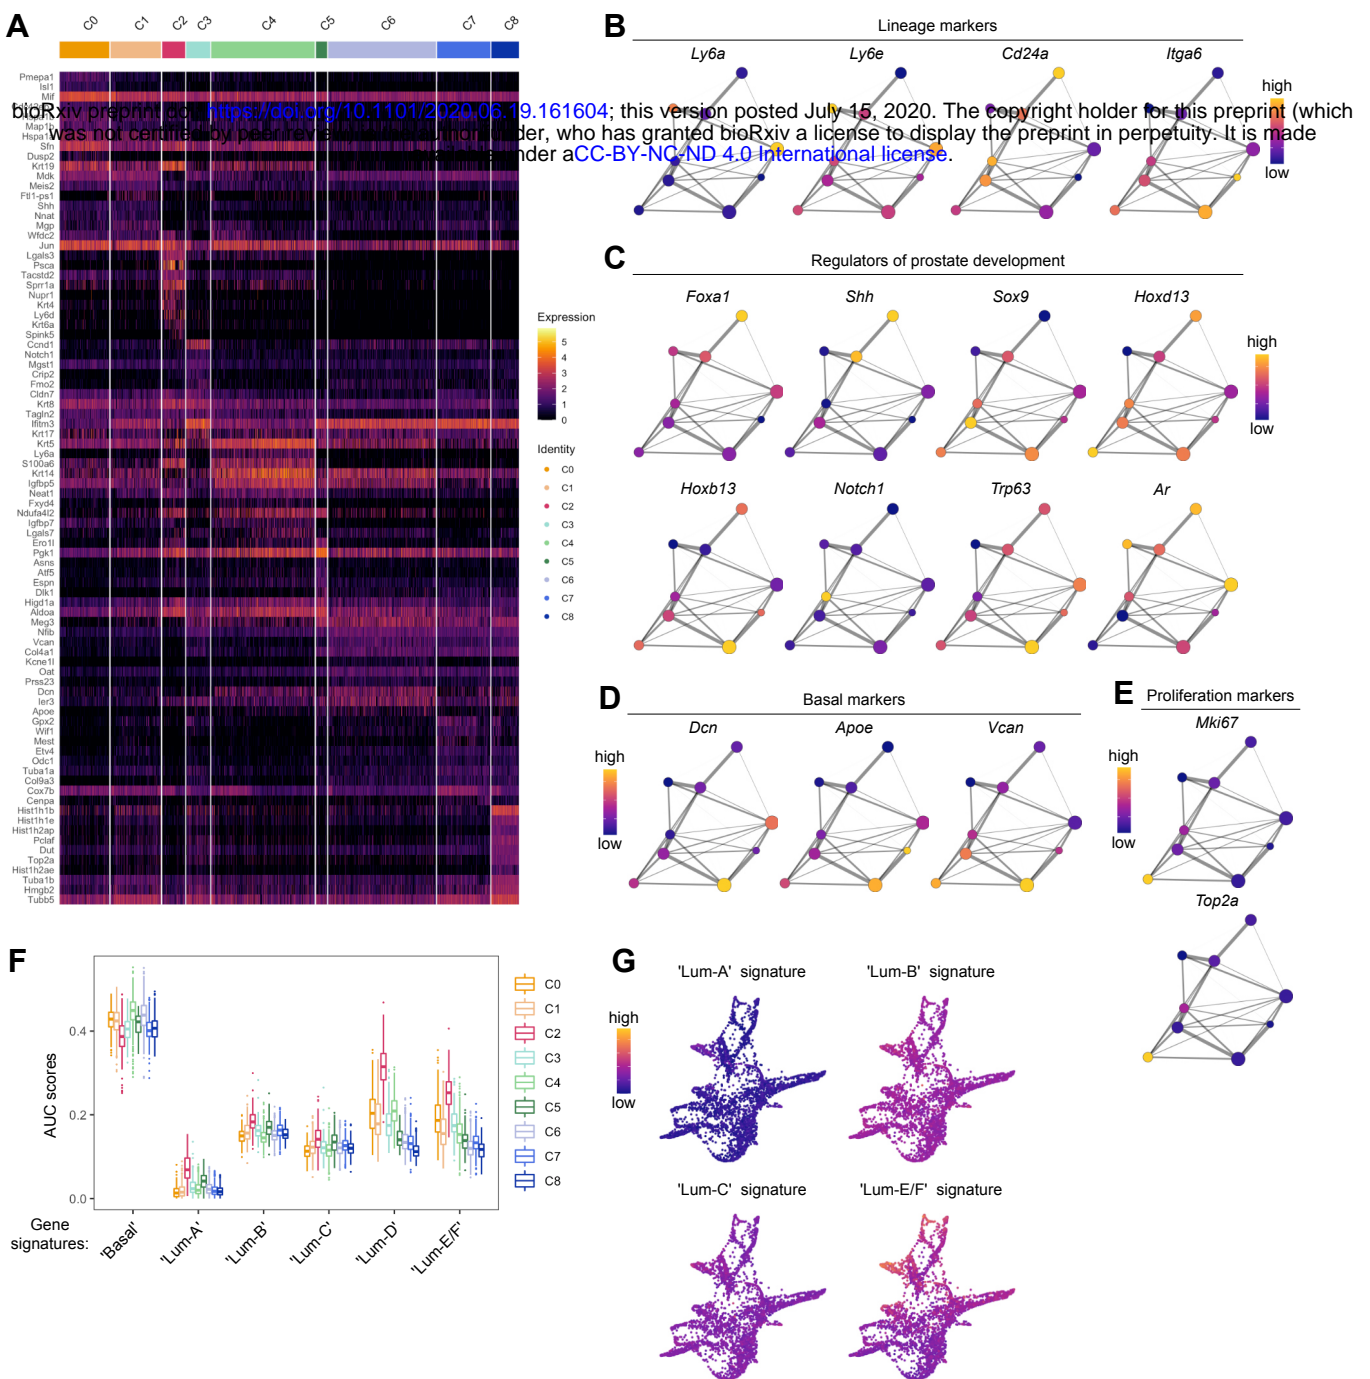

**Figure 6—figure supplement 13. Characterization of the developing prostatic epithelium in the scRNA-seq dataset of UGS explant culture.**

(A) Heatmap of the 10 most differentially upregulated genes per cluster. (B-E) PAGA representations with cluster nodes colored by a gradient representing the mean log-normalized expression levels of each genes indicated. (B) shows the expression of common prostate lineage markers, (C) shows known regulators of prostate development, (D) shows basal markers, (E) shows proliferation markers. (F) Box plots of per-cell AUC signature scores calculated using the 'AUCell' package for individual UGS explant clusters. Gene signatures were generated using the list of differentially upregulated genes previously obtained from our adult mouse prostate clusters. (G) Force directed visualization of the developing prostatic epithelium in UGS explant cultures. Color gradient represents AUC scores per cell.

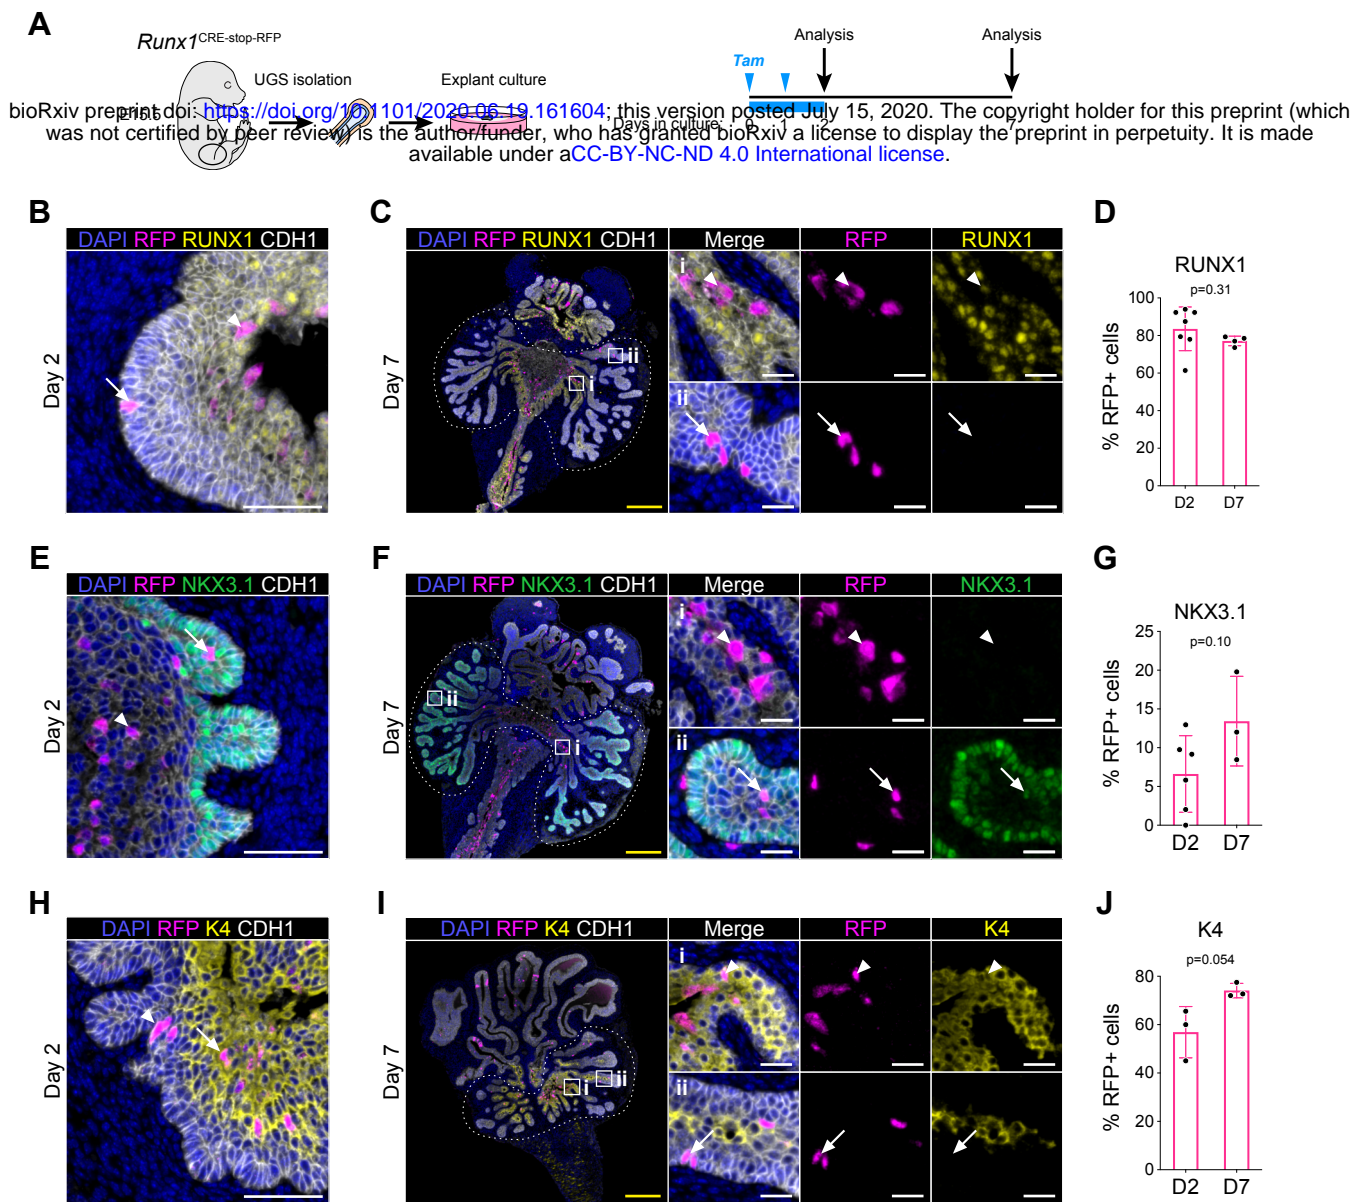

**Figure 7. RUNX1<sup>+</sup> cells contribute to the establishment of the proximal luminal lineage during embryonic prostate development.**

(A) Strategy for lineage-tracing of RUNX1<sup>+</sup> cells in UGS explant cultures. Tamoxifen was applied on day 0 and day 1 and washed out on day 2. (B, C) Co-immunostaining of RFP, RUNX1, CDH1 in UGS explants harvested at day 2 (B) and day 7 (C). Higher magnification images of proximal (i) and (ii) distal regions are shown for day 7. Arrows show RFP<sup>+</sup> RUNX1<sup>-</sup> cells, arrowheads show RFP<sup>+</sup> RUNX1<sup>+</sup> cells. Scale bars: 200 $\mu$ m (yellow) and 50 $\mu$ m (white). (C) Quantification of % of epithelial RUNX1<sup>+</sup> cells in the RFP subset at day 2 ( $n = 7$ ) and day 7 ( $n = 3$ ) of UGS explant cultures. Quantification was performed within the boundaries delimited in B by dotted lines. (E, F) Co-immunostaining of RFP, NKX3.1, CDH1 in UGS explants harvested at day 2 (E) and day 7 (F). Higher magnification images of (i) proximal and (ii) distal regions are shown for day 7. Arrows show RFP<sup>+</sup> NKX3.1<sup>+</sup> cells, arrowheads show RFP<sup>+</sup> NKX3.1<sup>-</sup> cells. Scale bars: 200 $\mu$ m (yellow) and 50 $\mu$ m (white). (G) Quantification of % of epithelial NKX3.1<sup>+</sup> cells in the RFP subset at day 2 ( $n = 6$ ) and day 7 ( $n = 4$ ) of UGS explant cultures. Quantification was performed within the boundaries delimited in F by dotted lines. (H, I) Co-immunostaining of RFP, K4, CDH1 in UGS explants harvested at day 2 (H) and day 7 (I). Higher magnification images of (i) proximal and (ii) distal regions are shown for day 7. Arrows show RFP<sup>+</sup> K4<sup>-</sup> cells, arrowheads show RFP<sup>+</sup> K4<sup>+</sup> cells. Scale bars: 200 $\mu$ m (yellow) and 50 $\mu$ m (white). (J) Quantification of % of epithelial K4<sup>+</sup> cells in the RFP subset at day 2 ( $n = 3$ ) and day 7 ( $n = 3$ ) of UGS explant cultures. Quantification was performed within the boundaries delimited in I by dotted lines.



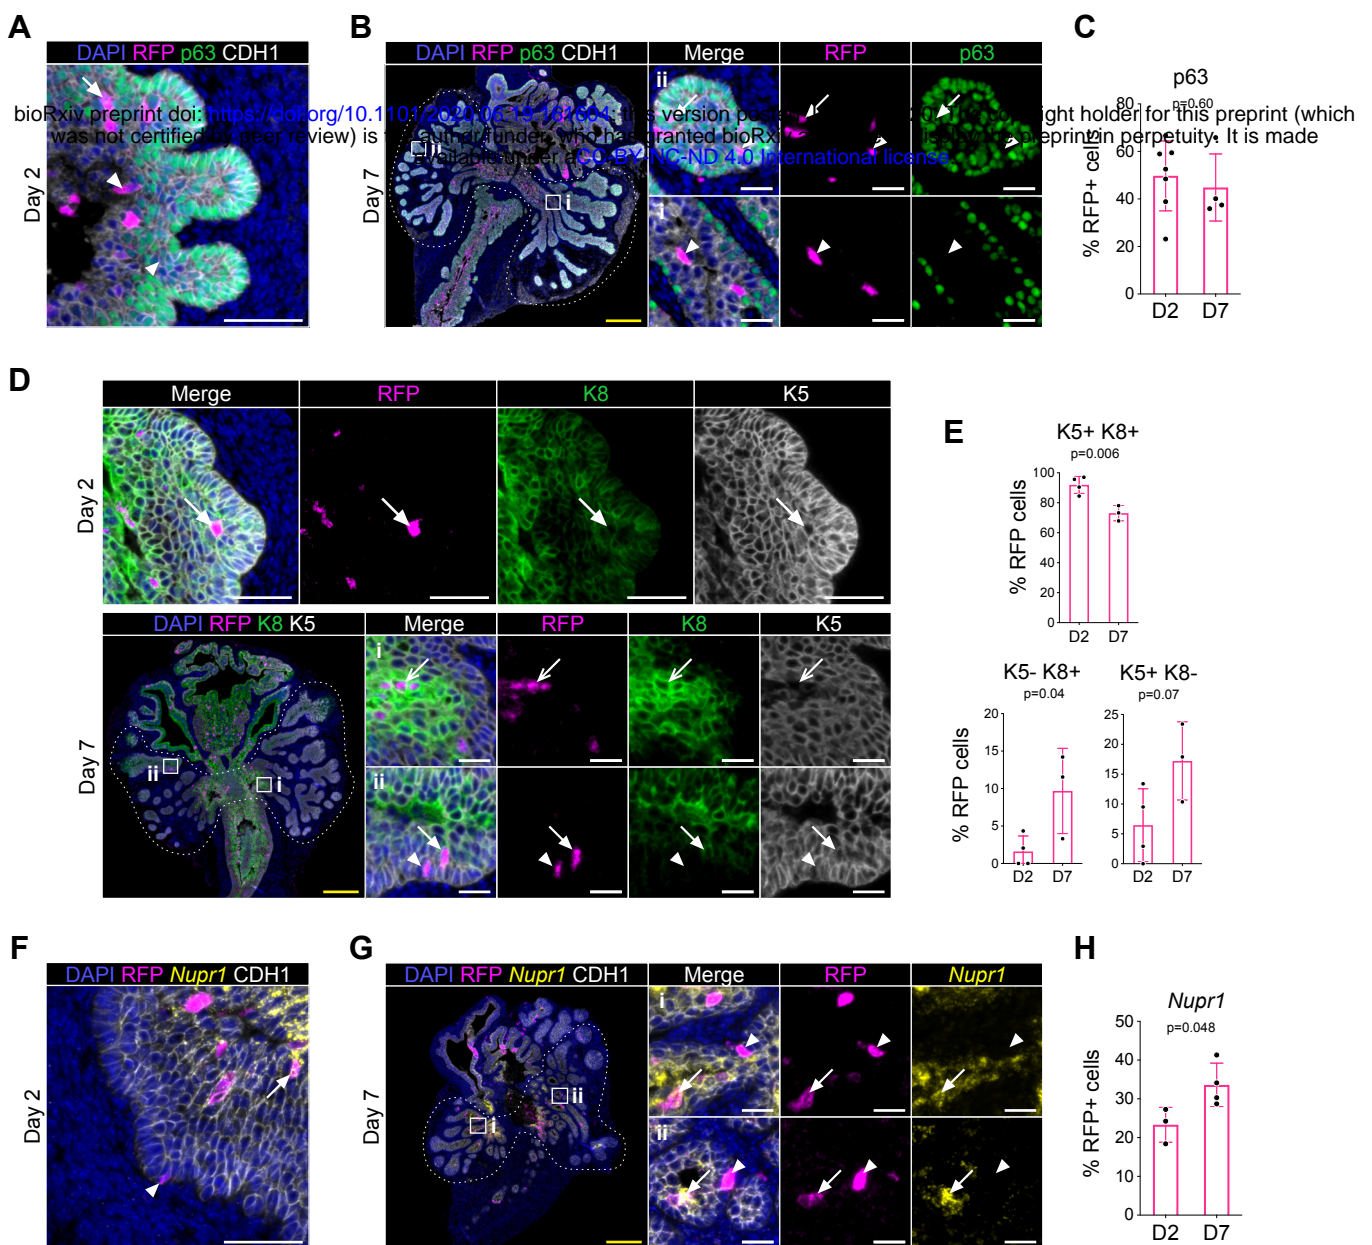

**Figure 7—figure supplement 14. Lineage-tracing of RUNX1 expressing cells in UGS explants.**

(A, B) Co-immunostaining of RFP, p63, CDH1 in UGS explants harvested at day 2 (A) and day 7 (B). Higher magnification images of (i) proximal and (ii) distal regions are shown for day 7. Arrows show RFP<sup>+</sup> p63<sup>+</sup> cells, arrowheads show RFP<sup>+</sup> p63<sup>-</sup> cells. Scale bars: 200 $\mu$ m (yellow) and 50 $\mu$ m (white). (C) Quantification of the percentage of epithelial RFP<sup>+</sup> p63<sup>+</sup> cells at day 2 ( $n = 7$ ) and day 7 ( $n = 4$ ) of UGS explant cultures. Quantification was performed within the boundaries delimited in B by dotted lines. (D) Co-immunostaining of RFP, K5, K8 in UGS explants harvested at day 2 (top) and day 7 (bottom). Higher magnification images of proximal (i) and (ii) distal regions are shown for day 7. Arrows show RFP<sup>+</sup> K5<sup>+</sup> K8<sup>+</sup> cells, chevron arrows show RFP<sup>+</sup> K5<sup>-</sup> K8<sup>+</sup>, arrowheads show RFP<sup>+</sup> K5<sup>+</sup> K8<sup>-</sup> cells. Scale bars: 200 $\mu$ m (yellow) and 50 $\mu$ m (white). (E) Quantification of the percentage of epithelial K5<sup>+</sup> K8<sup>+</sup>, K5<sup>-</sup> K8<sup>+</sup> cells and K5<sup>+</sup> K8<sup>-</sup> cells in the RFP subset at day 2 ( $n = 4$ ) and day 7 ( $n = 3$ ) of UGS explant cultures. Quantifications were performed within the boundaries delimited in D by dotted lines. (F, G) Co-immunostaining of RFP, *Nupr1* (mRNA), CDH1 in UGS explants harvested at day 2 (F) and day 7 (G). Higher magnification images of (i) proximal and (ii) distal regions are shown for day 7. Arrows show RFP<sup>+</sup> *Nupr1*<sup>+</sup> cells, arrowheads show RFP<sup>+</sup> *Nupr1*<sup>-</sup> cells. Scale bars: 200 $\mu$ m (yellow) and 50 $\mu$ m (white). (J) Quantification of % of epithelial K4<sup>+</sup> cells in the RFP subset at day 2 ( $n = 3$ ) and day 7 ( $n = 4$ ) of UGS explant cultures. Quantification was performed within the boundaries delimited in G by dotted lines.
