1           **RUNX1 marks a luminal castration resistant lineage established**  
2                                                   **at the onset of prostate development**

3

4   **AUTHORS**

5   Renaud Mevel<sup>1</sup>, Ivana Steiner<sup>2</sup>, Susan Mason<sup>3</sup>, Laura C.A. Galbraith<sup>3</sup>, Rahima Patel<sup>1</sup>,  
6   Muhammad ZH Fadlullah<sup>1</sup>, Imran Ahmad<sup>3,4</sup>, Hing Y. Leung<sup>3,4</sup>, Pedro Oliveira<sup>5</sup>, Karen Blyth<sup>3,4</sup>,  
7   Esther Baena<sup>2,6</sup>, Georges Lacaud<sup>1,7</sup>

8

9   **AFFILIATIONS**

10   <sup>1</sup> Cancer Research UK, Stem Cell Biology Group, Cancer Research UK Manchester Institute, The  
11   University of Manchester, Alderley Park, Alderley Edge, Macclesfield, SK10 4TG, UK.

12   <sup>2</sup> Cancer Research UK, Prostate Oncobiology Group, Cancer Research UK Manchester Institute,  
13   The University of Manchester, Alderley Park, Alderley Edge, Macclesfield, SK10 4TG, UK.

14   <sup>3</sup> Cancer Research UK Beatson Institute, Bearsden, Glasgow, G61 1BD, UK.

15   <sup>4</sup> Institute of Cancer Sciences, College of Medical, Veterinary and Life Sciences, University of  
16   Glasgow, Bearsden, Glasgow, G61 1QH, UK.

17   <sup>5</sup> Department of Pathology, The Christie NHS Foundation Trust, Manchester, UK.

18   <sup>6</sup> Belfast-Manchester Movember Centre of Excellence, Cancer Research UK Manchester  
19   Institute, The University of Manchester, Alderley Park SK10 4TG, UK.

20   <sup>7</sup> Correspondence: [georges.lacaud@manchester.ac.uk](mailto:georges.lacaud@manchester.ac.uk)

21   Phone: +44 (0) 161 446 6058, Fax: +44 (0) 161 446 3109

## 22 **ABSTRACT**

23 The characterization of prostate epithelial hierarchy and lineage heterogeneity is critical to  
24 understand its regenerative properties and malignancies. Here, we report that the transcription  
25 factor RUNX1 marks a specific subpopulation of proximal luminal cells (PLCs), enriched in the  
26 periurethral region of the developing and adult mouse prostate, and distinct from the  
27 previously identified NKX3.1<sup>+</sup> luminal castration resistant cells. Using scRNA-seq profiling and  
28 genetic lineage tracing, we show that RUNX1<sup>+</sup> PLCs are unaffected by androgen deprivation,  
29 and do not contribute to the regeneration of the distal luminal compartments. Furthermore, we  
30 demonstrate that a transcriptionally similar RUNX1<sup>+</sup> population emerges at the onset of  
31 embryonic prostate specification to populate the proximal region of the ducts. Collectively, our  
32 results reveal that RUNX1<sup>+</sup> PLCs is an intrinsic castration-resistant and self-sustained lineage  
33 that emerges early during prostate development and provide new insights into the lineage  
34 relationships of the prostate epithelium.

## 35 INTRODUCTION

36 The prostate is a glandular organ of the mammalian male reproductive system. In mice,  
37 prostate development starts during embryogenesis at embryonic day (E) 15.5-16.5 with the  
38 emergence of the first prostatic buds from the rostral end of the urogenital sinus (UGS) (Bhatia-  
39 Gaur et al., 1999; Georgas et al., 2015; Keil et al., 2012; Toivanen & Shen, 2017). These initial  
40 buds grow into the surrounding mesenchyme to develop postnatally and through puberty into  
41 a branched ductal network organized in distinct pairs of lobes, known as the anterior prostate  
42 (AP), dorsolateral prostate (DLP) and ventral prostate (VP) (Sugimura et al., 1986a). Each lobe  
43 has distinct branching patterns, histopathological characteristics, and is thought to contribute  
44 differently to the physiological function of the prostate. The differentiated epithelium of the  
45 adult prostate gland is mainly composed of basal and luminal cells, interspersed with rare  
46 neuroendocrine cells (Shen & Abate-Shen, 2010; Toivanen & Shen, 2017; Y. Wang et al., 2001).  
47 Luminal cells form a layer of polarized tall columnar cells that depend on androgen signaling  
48 and produce the prostatic secretions. Basal cells act as a supportive layer located between the  
49 luminal cells and the surrounding stroma.

50 Despite being mostly quiescent under homeostatic conditions, the prostate gland  
51 encompasses incredible plasticity. In mice, surgical castration-induced prostate involution has  
52 proven an invaluable tool to identify progenitor castration-resistant cell populations,  
53 characterized by their ability to survive in the absence of androgens, and to fully regenerate an  
54 intact adult prostate after re-administration of testosterone (Barros-Silva et al., 2018; Kwon et  
55 al., 2016; McAuley et al., 2019; Tsujimura et al., 2002; B. Wang et al., 2015; X. Wang et al.,  
56 2009; Yoo et al., 2016). Such plasticity has also been shown in defined experimental conditions

57 to stimulate regenerative properties of epithelial subpopulations, including transplantations  
58 (Barros-Silva et al., 2018; Burger et al., 2005; Lawson et al., 2007; Lukacs et al., 2010;  
59 Richardson et al., 2004; X. Wang et al., 2009; Xin et al., 2005; Yoo et al., 2016), injury repair  
60 (Centonze et al., 2020; Horton et al., 2019; Kwon et al., 2014; Toivanen et al., 2016), and  
61 organoid assays (Chua et al., 2014; Höfner et al., 2015; Karthaus et al., 2014). In addition,  
62 several studies have proposed that progenitor populations with distinct physiological roles and  
63 regenerative capacity reside at different locations within the prostate (Burger et al., 2005;  
64 Crowell et al., 2019; Goldstein et al., 2008; Goto et al., 2006; Kwon et al., 2016; Leong et al.,  
65 2008; McNeal, 1981; Tsujimura et al., 2002). However, the precise cellular hierarchy and how it  
66 is established during development remains controversial.

67         RUNX transcription factors (TF) are master regulators of lineage commitment and cell  
68 fate (Mevel et al., 2019). In particular, RUNX1 is essential for the ontogeny of the hematopoietic  
69 system and alterations of RUNX1 have been associated with a broad spectrum of hematological  
70 malignancies. Interestingly, increasing evidence implicates RUNX1 in the biology and pathology  
71 of hormone-associated epithelia (Lie-A-Ling et al., 2020; Riggio & Blyth, 2017; Scheitz &  
72 Tumber, 2013), including breast (Browne et al., 2015; Chimge et al., 2016; Ferrari et al., 2014;  
73 van Bragt et al., 2014), uterine (Planagumà et al., 2004, 2006), ovarian (Keita et al., 2013), and  
74 prostate cancers (Banach-Petrosky et al., 2007; Scheitz et al., 2012; Takayama et al., 2015).  
75 Despite the documented importance of RUNX TFs and reports of RUNX1 in PCa, its expression  
76 in the normal prostate gland during development, homeostasis, and regeneration has not been  
77 explored.



78            In this study, we found that *Runx1* marks a discrete subset of luminal cells located in the  
79 proximal region of the prostatic ducts. Using mouse models, combined with lobe-specific single-  
80 cell transcriptomic profiling of adult, castrated, and developing prostates, we show that RUNX1<sup>+</sup>  
81 proximal luminal cells represent a distinct lineage established at the onset of prostate  
82 development, displaying intrinsic castration-resistant and self-sustaining properties.

## 83 RESULTS

### 84 RUNX1 marks a subpopulation of prostate proximal luminal cells (PLCs)

85 We initially sought to characterize the expression pattern of *Runx1* in adult mouse  
86 prostate. While RUNX1 was detected in basal cells at multiple spatial locations, its expression  
87 was specifically high in a subset of luminal cells found in the proximal region of all three lobes,  
88 also known as periurethral (Figures 1A, B; Figure 1–figure supplement 1A, B). Sections were co-  
89 stained with NKX3.1, a master regulator of prostate development broadly expressed in luminal  
90 cells. Using quantitative image-based cytometry (QBIC), we found that RUNX1 and NKX3.1 had  
91 a largely mutually exclusive expression pattern, with a sharp transition from RUNX1<sup>+</sup> NKX3.1<sup>-</sup> to  
92 RUNX1<sup>-</sup> NKX3.1<sup>+</sup> cells in the proximal region (Figures 1A, B; Figure 1–figure supplement 1A, B).  
93 These proximal luminal cells had a unique histological profile, with a compact organization,  
94 intense nuclear hematoxylin staining, and increased nuclear-to-cytoplasmic ratio (Figure 1–  
95 figure supplement 1C). In contrast, distal luminal cells had a large cytoplasm with intense pink  
96 eosin staining, likely reflecting their secretory function. These observations suggest that RUNX1  
97 marks a subset of proximal luminal cells, distinct from the abundant NKX3.1<sup>+</sup> luminal population  
98 lining the rest of the prostate epithelium.

99 The proximal site of the prostate has been proposed to be enriched in cells with  
100 stem/progenitor properties (Goldstein et al., 2008; Kwon et al., 2016; Tsujimura et al., 2002;  
101 Yoo et al., 2016). In order to study the regenerative potential of *Runx1* expressing cells *ex vivo*,  
102 we took advantage of isoform-specific fluorescent reporter mouse models of *Runx1* (Draper et  
103 al., 2018; Sroczyńska et al., 2009). *Runx1* expression is controlled by two promoters, P1 and P2,  
104 that respectively drive the expression of the *Runx1c* and the *Runx1b* isoform (Mével et al.,

105 2019). We found that *Runx1* expression in the prostate was exclusively mediated by the  
106 proximal P2 promoter, in up to 30% of all epithelial EPCAM<sup>+</sup> prostate cells (Figure 1–figure  
107 supplement 2A-C). Flow-cytometry profiling confirmed the enrichment of P2-*Runx1*:RFP in both  
108 basal (EPCAM<sup>+</sup> CD49<sup>high</sup>) and luminal (EPCAM<sup>+</sup> CD24<sup>high</sup>) lineages of the proximal compared to  
109 the distal prostate (Figures 1C, D; Figure 1–figure supplement 2D). Mirroring our QBIC spatial  
110 analysis (Figure 1–figure supplement 1B), P2-*Runx1*:RFP was also detected in a large fraction of  
111 the VP epithelium (Figure 1–figure supplement 2D).

112 We therefore used the P2-*Runx1*:RFP mouse line to isolate *Runx1* positive (RFP<sup>+</sup>) and  
113 negative (RFP<sup>-</sup>) epithelial cells from the basal and luminal compartments of all three prostate  
114 lobes and evaluated their regenerative potential in organoid culture assays (Drost et al., 2016)  
115 (Figure 1E). The proximal and distal regions of the AP were analyzed separately. In line with  
116 previous reports, basal cells were more efficient at forming organoids compared to all luminal  
117 fractions (Drost et al., 2016, Kwon et al., 2015). Importantly, in the luminal fraction, proximal  
118 RFP<sup>+</sup> luminal cells of the AP consistently displayed higher Organoid Formation Capacity (OFC)  
119 than the RFP<sup>-</sup> fraction (Figure 1F). Luminal RFP<sup>+</sup> sorted cells of the DLP and VP also had a greater  
120 OFC than RFP<sup>-</sup> cells (Figure 1–figure supplement 3A). In contrast, no significant differences in  
121 OFC were observed between basal enriched subsets and distal luminal RFP<sup>+</sup> and RFP<sup>-</sup> cells.  
122 Brightfield assessment revealed that virtually all organoids had a ‘solid’ aspect, except for the  
123 predominantly ‘hollow’ organoids derived from proximal RFP<sup>+</sup> luminal cells (Figure 1–figure  
124 supplement 3B). To further characterize their lineage potential, we classified organoids into  
125 three types based on the expression of specific lineage markers: unipotent “basal-like” Keratin  
126 5<sup>+</sup> (K5<sup>+</sup>), unipotent “luminal-like” Keratin 8<sup>+</sup> (K8<sup>+</sup>), or multipotent K5<sup>+</sup> K8<sup>+</sup> (Figures 1G, H; Figure

127 1–figure supplement 3C). Interestingly, AP proximal luminal RFP<sup>+</sup> derived organoids were  
128 predominantly small unipotent K8<sup>+</sup>, while the remainder fraction mainly gave larger unipotent  
129 K5<sup>+</sup> organoids (Figures 1H; Figure 1–figure supplement 3D-E). Few multipotent K5<sup>+</sup> K8<sup>+</sup>  
130 organoids were also identified in nearly all populations.

131 Together, our results show that RUNX1 marks a specific subset of proximal luminal cells  
132 (PLCs), and that its expression in the prostate is mediated by the P2 promoter. RUNX1<sup>+</sup> PLCs  
133 have a particular predisposition to form unipotent K8<sup>+</sup> hollow organoids, suggesting a lineage  
134 bias towards the luminal identity, and highlighting differences within the luminal compartment  
135 of proximal and distal regions.

136

### 137 ***Runx1* expressing cells are enriched in the castrated prostate epithelium**

138 In mice, androgen-deprivation can be modelled by surgical castration which leads to  
139 prostate regression and enriches for castration-resistant cells (Toivanen & Shen, 2017; Zhang et  
140 al., 2018). This process is accompanied by the death of luminal androgen-dependent cells and a  
141 small proportion of basal cells (English et al., 1987; Sugimura et al., 1986b). To track changes in  
142 *Runx1* expression following androgen withdrawal, we surgically castrated P2-*Runx1*:RFP mice  
143 and harvested tissue  $\geq 4$  weeks post-surgery (Figure 2A). While intact prostates contained  $22.8$   
144  $\pm 6.0\%$  RFP<sup>+</sup> epithelial cells, their frequency increased to  $87 \pm 6.0\%$  following castration (Figures  
145 2B, C). High RUNX1 levels were no longer restricted to the proximal region, and RFP was  
146 detected in virtually all basal cells of the AP, DLP and VP, as well as more than 75% of the  
147 luminal castration-resistant cells (Figures 2D; Figure 2–figure supplement 1A). RUNX1  
148 expressing cells often co-expressed TROP2 (Figure 2E), known to be widely expressed in

149 castrated prostate epithelium (Goldstein et al., 2008; X.-D. Wang et al., 2007). Several  
150 castration-resistant luminal populations have been identified in mice (Barros-Silva et al., 2018;  
151 Kwon et al., 2016; McAuley et al., 2019; Tsujimura et al., 2002; B. Wang et al., 2015; X. Wang et  
152 al., 2009; Yoo et al., 2016), including rare castration-resistant *Nkx3-1* expressing cells (CARNs).  
153 Accordingly, we observed low, but detectable, levels of NKX3.1 in some luminal cells, but only  
154 occasional RUNX1<sup>+</sup> NKX3.1<sup>+</sup> luminal cells in the distal regions of the castrated prostate (Figures  
155 2D; Figure 2—figure supplement 1B, C). Importantly, the clear transition from RUNX1<sup>+</sup> to  
156 NKX3.1<sup>+</sup> cells identified in the proximal luminal layer of intact mice was conserved after  
157 castration (Figure 2D, ii).

158 Together, these results show that RUNX1 is expressed in the majority of the castration-  
159 resistant cells. The RUNX1<sup>+</sup> NKX3.1<sup>-</sup> subset identified in the proximal luminal epithelium of the  
160 intact prostate remain NKX3.1<sup>-</sup> following castration, supporting the notion that RUNX1<sup>+</sup> PLCs  
161 constitute a distinct lineage from distal NKX3.1<sup>+</sup> cells.

162

### 163 **scRNA-seq profiling of *Runx1*<sup>+</sup> and *Runx1*<sup>-</sup> cells in individual lobes of the intact and castrated** 164 **prostate**

165 To further characterize the RUNX1<sup>+</sup> and RUNX1<sup>-</sup> fractions residing at different  
166 anatomical locations of the prostate, we performed droplet-based single cell (sc)RNA-seq. We  
167 sorted EPCAM<sup>+</sup> RFP<sup>+</sup> and RFP<sup>-</sup> cells from individually dissected lobes of intact and castrated  
168 prostates isolated from P2-*Runx1*:RFP reporter mice (Figure 3A). Sorted populations were  
169 multiplexed using MULTI-seq lipid-tagged indices to minimize technical confounders such as  
170 doublets and batch effects (McGinnis, Patterson, et al., 2019). We retrieved a total of 3,825

171 prostate epithelial cells from all sorted populations, with a median of 2,846 genes per cell (see  
172 Methods; Figure 3—figure supplement 1, 2A-G). We identified 9 *in silico* computed clusters  
173 expressing canonical epithelial, basal, and luminal markers (Figure 3—figure supplement 2H-J). A  
174 large population of basal cells was annotated by merging 3 tightly connected subclusters  
175 broadly expressing *Krt5*, *Krt14*, and *Trp63* (Figures 3B-D; Figure 3—figure supplement 2E, J).  
176 Luminal populations expressed surprisingly heterogeneous levels of canonical luminal markers  
177 such as *Cd26/Dpp4*, *Cd24a*, *Krt8*, and *Krt18* (Figure 3—figure supplement 2I). We annotated  
178 those distinct clusters as Luminal-A (Lum-A), Lum-B, Lum-C, Lum-D, Lum-E and Lum-F (Figure  
179 3B). Differential gene expression analysis revealed genes strongly associated with each luminal  
180 subpopulation (Figures 3C, 3D; Figure 3—figure supplement 3A; Supplementary file 2).

181         Initially, we sought to evaluate the effect of androgen withdrawal on lobe-specific  
182 cellular heterogeneity. Lum-A/B/C/D were largely enriched in luminal cells originating from  
183 intact prostates, whereas Lum-E/F contained mainly castrated luminal cells (Figures 3E; Figure  
184 3—figure supplement 3B). Interestingly, Lum-A/C/F mainly contained VP cells, while Lum-B/D/E  
185 had a majority of AP and DLP cells, indicating that the lobular identity of luminal cells in the  
186 intact prostate is conserved following castration (Figures 3F; Figure 3—figure supplement 3C).  
187 These results suggest that a subset of intact Lum-A/C might undergo partial reprogramming  
188 during castration-induced regression and gives rise to the Lum-F cluster. Similarly, surviving  
189 Lum-B/D may predominantly reprogram into Lum-E cells upon castration. Alternatively, the  
190 small fraction of intact cells observed in Lum-E and Lum-F clusters might give rise to the  
191 expanded Lum-E/F clusters upon castration. In contrast to luminal cells, castrated basal cells  
192 were minimally affected by androgen-deprivation and clustered together with intact basal cells

193 (Figure 3E). Overall, these results highlight the dramatic changes occurring upon androgen  
194 deprivation in the representation of distinct luminal subpopulations.

195

### 196 ***Runx1* expressing luminal cells are transcriptionally similar to castration-resistant cells**

197 We next specifically focused our attention on RUNX1<sup>+</sup> luminal cells. The Lum-D cluster  
198 predominantly consisted of AP derived RFP<sup>+</sup> cells, as well as a small number of RFP<sup>+</sup> DLP and VP  
199 cells (Figure 3F, H; Figure 3—figure supplements 2E, 3B, 3C). High *Runx1* expression in Lum-D  
200 correlated with higher levels of *Tacstd2/Trop2*, Ly6 family members as well as *Runx2* (Figures  
201 3D, G; Figure 3—figure supplements 3D, E). In contrast, *Runx1* was barely detected in clusters  
202 Lum-B/C which expressed high levels of *Nkx3-1* while Lum-A cells expressed low levels of both  
203 *Runx1* and *Nkx3-1*. These results suggest that the Lum-D cluster corresponds to the distinct  
204 RUNX1<sup>+</sup> luminal cells identified in the proximal region of all three prostate lobes (Figure 1).

205 To further characterize the specificities of those populations, we performed gene  
206 ontology analysis. In line with the secretory role of distal luminal cells, clusters Lum-A/B/C were  
207 enriched in enzymatic activity and protein synthesis functions. In contrast, the Lum-D cluster  
208 was enriched in terms related to epithelial developmental processes, similar to Lum-E/F (Figure  
209 3—figure supplements 4A-I). This was supported by partition-based graph abstraction (Wolf et  
210 al., 2019), which uncovered a strong degree of connectivity between the mainly intact Lum-D  
211 and castrated Lum-E population (Figure 3B). Additionally, the Lum-D cluster contained a small,  
212 but defined, subpopulation of castrated epithelial cells, suggesting the preservation of its  
213 identity upon androgen deprivation (Figures 3E, F). In this population, we found very few genes  
214 significantly differentially expressed between intact and castrated cells (n=103; Supplementary

215 file 3). As expected, androgen-regulated genes including *PscA* and *Tspan1* were downregulated  
216 in the castrated subset, while strong contributors of the Lum-D identity such as *Tacstd2/Trop2*,  
217 *Krt4* and *Runx1* did not vary (Figure 3–figure supplement 4J). These observations further  
218 support the hypothesis that Lum-D/RUNX1<sup>+</sup> PLCs maintain their identity following androgen-  
219 deprivation.

220 Overall, our single-cell transcriptomic analysis highlighted a vast degree of  
221 heterogeneity within and between the luminal compartments of both intact and castrated  
222 mouse prostates. The tight transcriptional relationship observed between high *Runx1*  
223 expressing clusters Lum-D and Lum-E/F suggest that the Lum-D population, which corresponds  
224 to PLCs, may contain intrinsically castration-resistant luminal cells

225

### 226 **Lineage-tracing of *Runx1* expressing cells establishes the intrinsic castration resistant** 227 **properties of the proximal luminal lineage**

228 To determine if RUNX1<sup>+</sup> PLCs were enriched in castration-resistant cells, we combined  
229 prostate regression-regeneration assays with genetic lineage-tracing using *Runx1*<sup>mER-CRE-mER</sup>  
230 *Rosa*<sup>flox-stop-flox-tdRFP</sup> mice (Luche et al., 2007; Samokhvalov et al., 2007), henceforth *Runx1*<sup>CreER</sup>  
231 *Rosa26*<sup>LSL-RFP</sup> (Figure 4A). Using this model, we could genetically label an average of  $4.70 \pm 2.8\%$   
232 prostate epithelial *Runx1* expressing cells with RFP upon tamoxifen injection (Figures 4B, C;  
233 Figure 4–figure supplement 1A). This corresponded to  $0.54 \pm 0.2\%$  of the total epithelium  
234 (Figure 4E). Consistent with the expression pattern of *Runx1*, the majority of labelled cells were  
235 located in the proximal region of the prostate (Figure 4C), and co-expressed Keratin 4 (K4)  
236 (Figure 4–figure supplements 1D, E), previously found enriched in Lum-D cells (Figure 3D).



237           Following surgical castration, we found that the absolute number of RFP<sup>+</sup> marked cells  
238 remained stable (Figure 4–figure supplements 1C, D). However, the frequency of RFP<sup>+</sup> cells in  
239 the epithelial compartment increased by ~4.3 fold (Figures 4E; Figure 4–figure supplement 1B)  
240 indicating that *Runx1* expressing cells have an enhanced capacity to survive castration  
241 compared to *Runx1* negative cells. Next, we investigated whether these intrinsically castration-  
242 resistant *Runx1* expressing cells were involved in epithelial regeneration upon testosterone  
243 addback (Figure 4B, bottom). Surprisingly, only  $0.71 \pm 0.2\%$  RFP<sup>+</sup> epithelial cells were found in  
244 the regenerated prostate, which was comparable to the intact state (Figures 4E; Figure 4–figure  
245 supplements 1B-D). Although the majority of RFP<sup>+</sup> clones consisted of single cells, we did  
246 observe a minor ~2-fold increase in the frequency of larger clones (2-4 cells) after regeneration,  
247 highlighting a modest contribution of RFP labeled cells during prostate regeneration (Figures 4F,  
248 G). We found that most RFP marked cells were luminal K8<sup>+</sup> in intact, castrated, and regenerated  
249 prostates (Figures 4F, H), with only a few basal K5<sup>+</sup> RFP<sup>+</sup> cells detected in distal areas (Figure  
250 4F). Strikingly, more than 90% of all RFP<sup>+</sup> cells remained negative for NKX3.1 in all experimental  
251 arms (Figure 4I).

252           Thus, these results indicate that RFP<sup>+</sup> cells, including PLCs, are mostly unaffected by  
253 fluctuations in androgen levels during regression-regeneration assays. RUNX1 expression marks  
254 intrinsically castration-resistant luminal cells that do not contribute substantially to the  
255 expansion of luminal NKX3.1<sup>+</sup> cells during prostate regeneration.

256

257 ***Runx1* marks proximal cells during prostate development**

258           Given the singular identity of proximal luminal *Runx1* expressing cells in the adult  
259 prostate, we then asked if this luminal lineage was already emerging during prostate  
260 development. At E18.5, once the first prostate buds have emerged, RUNX1 was mainly found in  
261 the K8<sup>high</sup> inner layers of the stratified urogenital epithelium (UGE) (Figure 5A). Interestingly,  
262 these cells also co-expressed K4 (Figure 5–figure supplement 1A), previously found in the Lum D  
263 population (Figure 3D), as well as LY6D, recently shown to mark a subset of adult luminal  
264 progenitors (Barros-Silva et al., 2018) (Figure 5–figure supplement 1B). In contrast, RUNX1  
265 expression was low in p63<sup>+</sup> and K5<sup>+</sup> cells, either lining the outer UGE or found in the tips of  
266 premature NKX3.1<sup>+</sup> prostate buds (Figures 5A-C). At postnatal day 14 (P14), a prepubescent  
267 stage when most of the initial branching events have already occurred (Sugimura et al., 1986a;  
268 Tika et al., 2019), RUNX1 was broadly expressed in the proximal region (Figure 5D), mainly in  
269 K4<sup>+</sup> luminal cells and in some K5<sup>+</sup> or p63<sup>+</sup> cells (Figure 5–figure supplement 1C-E). Conversely,  
270 NKX3.1<sup>+</sup> cells were found in distal locations, largely distinct from RUNX1<sup>+</sup> cells. The specific  
271 spatial expression pattern of RUNX1 in proximal luminal cells, largely mutually exclusive with  
272 NKX3.1, suggests that these two transcription factors already mark distinct cellular lineages  
273 during embryonic prostate organogenesis.

274           To study the dynamic emergence of RUNX1<sup>+</sup> cells during prostate development, we  
275 utilized an explant culture system (Berman et al., 2004; Doles et al., 2005; Kruithof-de Julio et  
276 al., 2013; Lopes et al., 1996). Dissected E15.5 UGS were cultured for up to 7 days in the  
277 presence of dihydrotestosterone (Figures 5E, F). Bud formation was initiated within 2 days of  
278 culture (Figure 5G) and composed of a double positive K5<sup>+</sup> K8<sup>+</sup> stratified epithelium, partially  
279 diversifying by day 7 (Figure 5–figure supplement 2A, B). On day 0 (E15.5), RUNX1 was detected

280 at the rostral end of the UGE, particularly within the inner layers of the stratified epithelium.  
281 After 1 day in culture, NKX3.1 expression emerged in RUNX1<sup>+</sup> cells located in the outer layers of  
282 the UGE, while defined budding was yet to be observed. On day 2, NKX3.1<sup>+</sup> prostate buds were  
283 evident and had reduced or absent RUNX1 expression. This pattern was conserved in the  
284 mature explant, in which distal tips were mainly NKX3.1<sup>+</sup>, whereas the proximal area remained  
285 RUNX1<sup>+</sup> (Figures 5G, H), and co-expressed LY6D and K4 (Figure 5—figure supplements 2C, D).  
286 Cellular proliferation marked by Ki67 was more substantial in distal regions, suggesting that  
287 most of the expansion did not take place in the RUNX1<sup>+</sup> compartment (Figure 5—figure  
288 supplement 2E).

289         These results suggest that prostate budding originates from a subset of cells located in  
290 the outer layers of the stratified UGE, transiently marked by RUNX1 and NKX3.1. During  
291 embryonic prostate development, *Runx1* expression is already primarily confined to the  
292 proximal region of the prostatic ducts, in a distinct compartment from NKX3.1<sup>+</sup> cells.

293

#### 294 **scRNA-seq of explant cultures reveals the specification of the proximal luminal lineage during** 295 **embryonic prostate development**

296         The characterization by immunostainings of continuous developmental processes is  
297 generally constrained to a small number of markers at a time. To further study the specification  
298 of RUNX1 and NKX3.1 lineages, we performed scRNA-seq on UGS explant cultures collected at  
299 successive time points: E15.5 (D0), day 1 (D1), day 3 (D3), and day 6 (D6) (Figure 6A). After data  
300 processing, 3,937 developing prostatic cells were retained, with a median of 3,608 genes per  
301 cell (see Methods; Figure 6—figure supplement 1).

302 Visualization of the dataset using a force-directed layout highlighted the progressive  
303 cellular diversification taking place from D0 to D6 (Figure 6B). Cellular populations were divided  
304 into 9 clusters, annotated C0 to C8 (Figures 6C-E). C0/C1 contained the majority of D0 and D1  
305 derived cells, while C2-C8 emerged and expanded at later time points. Due to the primitive  
306 nature of the UGE at these time points, the classical basal and luminal lineages were not fully  
307 established yet (Figures 6F; Figure 6—figure supplements 2A-E; Supplementary file 4).  
308 Nevertheless, C4-C6 had a more pronounced ‘basal’ identity compared to the other clusters.  
309 *Krt5/Krt14* marked mainly C4, and additional basal markers including *Trp63*, *Dcn*, *ApoE*, or *Vcan*  
310 were higher in C5/C6. Overall, known regulators of prostate development (Toivanen & Shen,  
311 2017) displayed a variable expression pattern across the different clusters. For example, *Foxa1*  
312 and *Shh* were strongly expressed in C0/C1, *Notch1* was higher in C3, and *Sox9* in C7 (Figure 6—  
313 figure supplement 2C), highlighting the potential of this dataset to interrogate specific features  
314 of prostate development.

315 Consistent with our previous results, *Runx1* was highly expressed in clusters having  
316 lower *Nkx3-1* levels, including C0, C1, C2 and C4 (Figure 6G). To determine how these clusters  
317 relate to differentiated prostate lineages, we interrogated population-specific gene signatures  
318 previously identified in the adult (Figure 3). The ‘Basal’ signature was enriched across all  
319 clusters, especially in C4/C6 (Figures 6I; Figure 6—figure supplement 2F, G). Strikingly, the ‘Lum-  
320 D’ derived signature was highly enriched in C2 compared to all the other adult luminal  
321 population signatures, suggesting that the ‘Lum-D’ fate is determined early during prostate  
322 development. The singular identity of C2 was characterized by genes previously found highly

323 expressed in the adult ‘Lum-D’ population, including *Tacstd2/Trop2*, *Krt4*, *Psca*, as well as *Ly6d*  
324 and *Nupr1* (Figure 6H; Figure 6–figure supplement 2A).

325 Collectively, our scRNA-seq analysis show that adult ‘Lum-D’/PLCs share strong  
326 similarities with the unique C2 population identified in embryonic explant cultures. This  
327 suggests that the distinct proximal luminal lineage is established at the very onset of prostate  
328 specification.

329

### 330 **RUNX1<sup>+</sup> cells contribute to the establishment of the proximal luminal lineage during** 331 **embryonic prostate development**

332 To trace the fate of RUNX1<sup>+</sup> cells during embryonic prostate specification, we cultured  
333 UGS explants isolated from the *Runx1<sup>CreER</sup> Rosa26<sup>LSL-RFP</sup>* lineage tracing model. We performed 2  
334 pulses of tamoxifen treatment on day 0 and 1 of culture and analyzed the explants on day 2 and  
335 day 7 (Figure 7A). The majority of the RFP labeled cells were in the most proximal RUNX1<sup>+</sup>  
336 subset and rarely found in the distal area of the branches, where RUNX1<sup>-</sup> cells reside (Figures  
337 7B, C). Accordingly, the proportion of RFP<sup>+</sup> RUNX1<sup>+</sup> cells remained stable between day 2 and 7  
338 (Figure 7D). Also, the fraction of RFP<sup>+</sup> cells co-expressing p63 remained unchanged throughout  
339 the culture (Figure 7–figure supplements 1A-C), while a small fraction diversified into either K5<sup>+</sup>  
340 or K8<sup>+</sup> cells (Figure 7–figure supplements 1D, E). The scattered RFP<sup>+</sup> RUNX1<sup>-</sup> cells detected in  
341 distal branches by day 7 often co-expressed NKX3.1 (Figures 7E, F). Overall, this indicates that  
342 *Runx1* expressing cells only marginally contribute to the expansion of the NKX3.1 compartment  
343 (Figure 7G). Finally, we wondered whether RUNX1<sup>+</sup> cells contributed to the establishment of  
344 the proximal luminal lineage. We evaluated the proportion of RFP labelled cells co-expressing

345 K4, previously identified as a marker of the developing C2 and adult Lum-D populations (Figures  
346 3D and 6H). Interestingly, the fraction of K4<sup>+</sup> RFP labeled cells increased from 56.9 ± 10.6% to  
347 74.1 ± 3.0% between day 2 and 7 (Figures 7F, G). There was also an increase of RFP<sup>+</sup> cells  
348 expressing *Nupr1*, another marker of the C2 cluster (Figure 7–figure supplements 1F-H). Taken  
349 together, these results show that only a small subset of *Runx1* expressing cells contributes to  
350 the expansion of NKX3.1<sup>+</sup> lineage, found in the distal region of the developing prostatic buds.  
351 Instead, the majority of *Runx1* expressing cells preferentially remain in the proximal region of  
352 the premature buds, where the proximal luminal lineage is established.

## 353 **DISCUSSION**

354           In this study, we identified RUNX1 as a new marker of a luminal population enriched in  
355 the proximal region of the prostatic ducts. By combining scRNA-seq profiling and genetic  
356 lineage tracing of *Runx1* expressing cells, we show that RUNX1<sup>+</sup> PLCs present in the intact  
357 prostate constitute a developmentally distinct and intrinsically castration-resistant luminal  
358 lineage. We propose that proximal and distal lineages are separate luminal entities from the  
359 earliest stages of prostate development. As such, our study provides novel insights into the  
360 cellular composition and developmental hierarchy of the mouse prostate epithelium.

361

362           Until the recent advances in single-cell technologies, the prostate epithelial hierarchy  
363 was mainly defined based on anatomical features of the basal and luminal layers, their  
364 histological characteristics and the expression of a small subset of markers (Shen & Abate-Shen,  
365 2010; Toivanen & Shen, 2017). Here we present two comprehensive scRNA-seq dataset  
366 covering both the adult and the developing prostate. To our knowledge, this constitutes the  
367 first comprehensive single-cell atlas covering both intact and castrated adult mouse prostates,  
368 annotated by their lobe of origin. These datasets can be browsed interactively at  
369 <http://shiny.cruk.manchester.ac.uk/pscapp/>. In particular, our adult scRNA-seq dataset  
370 highlighted an extensive degree of cellular heterogeneity, in particular within the luminal  
371 epithelia. Several studies recently made similar observations either focusing on the AP  
372 (Karthaus et al., 2020), the intact prostate (Crowley et al., 2020; Joseph et al., 2020), or both the  
373 intact and castrated prostates (Guo et al., 2020). Integration of these multiple datasets will  
374 provide a more global view of the transcriptional landscape of the prostate epithelium.

375           Although mainly known as a master regulator of hematopoiesis, RUNX1 is increasingly  
376 implicated in hormone-associated epithelia including malignant conditions such as prostate  
377 cancer (Banach-Petrosky et al., 2007; Lie-A-Ling et al., 2020; Scheitz et al., 2012; Takayama et  
378 al., 2015). Here, we identified a subset of RUNX1<sup>+</sup> luminal cells located in the proximal region of  
379 the developing and adult prostate, referred to as RUNX1<sup>+</sup> PLCs, and corresponding to the Lum-D  
380 cluster identified in our adult scRNA-seq dataset. Of note, this subset appears to be the  
381 equivalent of the ‘L2’ (Karthaus et al., 2020) or ‘LumP’ (Crowley et al., 2020), or ‘Lum-C’ (Guo et  
382 al., 2020) clusters identified in recent studies. In light of the extensive contribution of RUNX  
383 transcription factors to developmental processes (Mével et al., 2019), our study suggests that  
384 *Runx1*, but also *Runx2*, may be involved in the development and maintenance of specific  
385 subpopulations of the prostate epithelium. Future work should therefore aim at characterizing  
386 the functional role played by RUNX factors in the prostate, in particular in PLCs.

387           We demonstrate that these RUNX1<sup>+</sup> PLCs exhibit a greater organoid forming potential  
388 compared to the remaining luminal fraction, consistent with previous reports isolating similar  
389 proximal populations using different markers such as SCA-1, TROP2 or CD26 (Crowley et al.,  
390 2020; Goldstein et al., 2008; Guo et al., 2020; Karthaus et al., 2020; Kwon et al., 2016).  
391 Furthermore, RUNX1<sup>+</sup> PLCs predominantly formed unipotent K8<sup>+</sup> hollow organoids  
392 demonstrating their preferential commitment to the luminal fate. The greater clonogenicity of  
393 RUNX1<sup>+</sup> PLCs may in fact be linked to the gene expression profile of the corresponding Lum-D  
394 population, suggesting a more immature epithelial state, committed to the luminal lineage but  
395 not the secretory function of the prostate. Similar to the enhanced regenerative potential of  
396 glandular basal cells under specific regenerative conditions (Centonze et al., 2020), it is



397 tempting to speculate that these cells act as a latent niche of ‘facultative’ luminal stem cells  
398 (Clevers & Watt, 2018), primed to generate a structured prostatic epithelium under defined  
399 conditions.

400 Further characterization of RUNX1 expression in prostate development revealed a  
401 consistent expression pattern with the adult. RUNX1<sup>+</sup> luminal cells were restricted to the most  
402 proximal region of the developing prostate buds, both in embryos and UGS explant cultures.  
403 Our scRNA-seq of the developing prostate revealed a broad basal identity, supporting the  
404 presence of multipotent basal progenitors during embryonic development (Ousset et al., 2012;  
405 Pignon et al., 2013), switching to unipotency postnatally (Tika et al., 2019). However, we  
406 observed a distinct cluster (C2) that strongly resembled the adult Lum-D population, suggesting  
407 an early branching event towards the proximal luminal fate at the onset of prostate  
408 development. Subsequent lineage tracing experiments indicated that *Runx1* expressing cells  
409 preferentially populate the emerging proximal luminal identity. It would be interesting to  
410 determine if the adult Lum-A, Lum-B, and Lum-C derive from multipotent-basal progenitors or  
411 from any specific clusters identified in the developing prostate. This appears to be the case at  
412 least for the adult Lum-D/RUNX1<sup>+</sup> PLCs which already emerges during embryonic specification.

413 Our data also sheds a light on the regenerative potential of specific epithelial  
414 populations. Basal and luminal lineages have previously been shown to be largely self-sustained  
415 using generic basal and luminal *Cre* drivers (Choi et al., 2012; Ousset et al., 2012). However,  
416 whether distinct subpopulations of luminal cells contribute to the regeneration of the others  
417 remains poorly understood (X. Wang et al., 2009; Yoo et al., 2016). Our characterization of  
418 RUNX1<sup>+</sup> PLCs and the detection of a wide variety of luminal populations in our adult prostate

419 scRNA-seq data highlights the possible existence of multiple self-contained luminal populations.  
420 Indeed, *Runx1* driven genetic tracing experiments in regression-regeneration assays revealed  
421 that RUNX1<sup>+</sup> PLCs did not contribute substantially to the regeneration of distal NKX3.1<sup>+</sup> cells. It  
422 was however evident that RUNX1<sup>+</sup> PLCs are intrinsically castration resistant and capable of  
423 sustaining their own lineage in the regenerated prostate. Recently, it was proposed that  
424 prostate epithelial regeneration is driven by almost all luminal cells persisting in castrated  
425 prostates (Karthaus et al., 2020). Our results are compatible with this model, but we further  
426 demonstrate that not all luminal subsets retain the same *in vivo* regenerative potential in  
427 response to androgen stimulation. Thus, we suggest that the model of self-sustained basal and  
428 luminal populations might be extended to individual luminal subpopulations. This hypothesis  
429 should be tested in the future using a more specific Lum-D *Cre* driver (e.g. *Krt4/Psca*). It will also  
430 be of interest to investigate the self-sustenance of other luminal compartments using Lum-A,  
431 Lum-B and Lum-C specific *Cre* drivers.

432 Finally, our study suggests that the emerging C2/Lum-D population retains a more  
433 embryonic-like program, which may relate to their intrinsic castration-resistant potential and  
434 have broader relevance to cancer treatment. Along these lines, recent work by Guo and  
435 colleagues indicates that *Pten* loss induced in *Psca* expressing cells of the proximal prostate can  
436 initiate prostatic intraepithelial neoplasia (Guo et al., 2020). These results warrant future  
437 investigation of this luminal subset in the context of cancer development, tumor aggressiveness  
438 and treatment responses.

439

440           In conclusion, we characterized the expression pattern of *Runx1* in the developing,  
441 normal and castrated mouse prostate. We observed that *Runx1* marks proximal luminal cells,  
442 which is a distinct luminal lineage emerging early during prostate specification, displaying  
443 intrinsic castration-resistant and self-sustaining properties. Our results therefore reveal strong  
444 intrinsic lineage differences within the luminal compartment of the prostate epithelium.

445 **MATERIALS AND METHODS**

446 **KEY RESOURCES TABLE**

| Reagent type (species) or resource                      | Designation                                                                                                        | Source or reference                                 | Identifiers                        | Additional information                     |
|---------------------------------------------------------|--------------------------------------------------------------------------------------------------------------------|-----------------------------------------------------|------------------------------------|--------------------------------------------|
| Strain, strain background ( <i>Mus musculus</i> , male) | ICR (CD-1) wild-type                                                                                               | Envigo                                              | Hsd:ICR (CD-1)                     | 7-15 week old males                        |
| Strain, strain background ( <i>Mus musculus</i> , male) | P1- <i>Runx1</i> :GFP                                                                                              | Georges Lacaud lab                                  |                                    | 7-15 week old males                        |
| Strain, strain background ( <i>Mus musculus</i> , male) | P2- <i>Runx1</i> :RFP                                                                                              | Georges Lacaud lab                                  |                                    | 7-15 week old males                        |
| Strain, strain background ( <i>Mus musculus</i> , male) | <i>Runx1</i> <sup>mER-CRE-mER</sup><br><i>Runx1</i> <sup>CreER</sup><br><i>Rosa26</i> <sup>LSL-RFP</sup>           | RIKEN (Japan)<br>Samokhvalov et al., 2007           | <i>Runx1</i> -MER-Cre-MER          | C57Bl/6J background<br>7-15 week old males |
| Strain, strain background ( <i>Mus musculus</i> , male) | <i>Rosa26</i> <sup>flox-stop-flox-tdRFP</sup><br><i>Runx1</i> <sup>CreER</sup><br><i>Rosa26</i> <sup>LSL-RFP</sup> | European Mouse Mutant Archive<br>Luche et al., 2007 | B6.Cg-Thy1<br>Gt(ROSA)26 Sortm1Hjf | C57Bl/6J background<br>7-15 week old males |
| Antibody                                                | Anti-RUNX1 (rabbit monoclonal)                                                                                     | Cell Signaling                                      | Cat: 8529<br>RRID:AB_10950225      | IHC/IF (1:100)                             |

|          |                                    |                |                                   |                   |
|----------|------------------------------------|----------------|-----------------------------------|-------------------|
| Antibody | Anti-NKX3.1<br>(rabbit polyclonal) | Athenaes       | Cat: AES-0314                     | IHC/IF<br>(1:200) |
| Antibody | Anti-CDH1<br>(goat polyclonal)     | R&D Systems    | Cat: AF748<br>AB_355568           | IHC/IF<br>(1:400) |
| Antibody | Anti-p63<br>(rabbit monoclonal)    | Cell Signaling | Cat: 39692<br>RRID:AB_2799159     | IHC/IF<br>(1:800) |
| Antibody | Anti-K5<br>(rabbit monoclonal)     | Abcam          | Cat:<br>ab52635<br>RRID:AB_869890 | IHC/IF<br>(1:400) |
| Antibody | Anti-K8<br>(rabbit monoclonal)     | Abcam          | Cat:<br>ab53280<br>RRID:AB_869901 | IHC/IF<br>(1:400) |
| Antibody | Anti-K4<br>(mouse monoclonal)      | Abcam          | Cat: Ab9004<br>RRID:AB_306932     | IHC/IF<br>(1:100) |
| Antibody | Anti-LY6D<br>(rabbit polyclonal)   | Proteintech    | Cat: 17361-1-AP                   | IHC/IF<br>(1:100) |
| Antibody | Anti-TROP-2<br>(goat polyclonal)   | R&D Systems    | Cat: AF1122<br>RRID:AB_2205662    | IHC/IF<br>(1:200) |
| Antibody | Anti-BrdU<br>(rat monoclonal)      | Abcam          | Cat: ab6326<br>RRID:AB_305426     | IHC/IF<br>(1:400) |
| Antibody | Anti-Ki67<br>(rabbit monoclonal)   | Abcam          | Cat:<br>ab15580<br>RRID:AB_443209 | IHC/IF<br>(1:800) |

|          |                                    |                              |                                                |                        |
|----------|------------------------------------|------------------------------|------------------------------------------------|------------------------|
| Antibody | Anti-RFP<br>(rabbit<br>polyclonal) | Rockland                     | Cat: 600-<br>402-379<br>RRID:AB_82<br>8391     | IHC/IF<br>(1:400)      |
| Antibody | Anti-RFP<br>(rabbit<br>monoclonal) | MBL                          | Cat: PM005<br>RRID:AB_59<br>1279               | IF (1:200)             |
| Antibody | Anti-GFP<br>(rabbit<br>polyclonal) | MBL                          | Cat: 598<br>RRID:AB_59<br>1816                 | IF (1:200)             |
| Antibody | EnVision+/HR<br>P Anti-Rabbit      | Dako (Agilent)               | Cat: K4003<br>RRID:AB_26<br>30375              | IHC/IF<br>Ready to use |
| Antibody | EnVision+/HR<br>P Anti-Rabbit      | Dako (Agilent)               | Cat: K4001<br>RRID:AB_28<br>27819              | IHC/IF<br>Ready to use |
| Antibody | ImmPRESS<br>HRP Anti-<br>Goat      | Vector<br>Laboratories       | Cat: MP-<br>7405<br>RRID:AB_23<br>36526        | IHC/IF<br>Ready to use |
| Antibody | ImmPRESS<br>HRP Anti-Rat           | Vector<br>Laboratories       | Cat: MP-<br>7444<br>RRID:AB_23<br>36530        | IHC/IF<br>Ready to use |
| Antibody | Donkey anti-<br>Goat IgG 647       | ThermoFische<br>r Scientific | Cat: A-<br>21447<br>RRID:AB_14<br>1844         | IF (1:400)             |
| Antibody | Anti-CD16/32<br>Fc block           | Biolegend                    | Cat: 101301<br>Clone: 93<br>RRID:AB_31<br>2800 | FACS (1:200)           |
| Antibody | Anti-CD45<br>SB436                 | ThermoFische<br>r Scientific | Cat: 62-<br>0451-82<br>Clone: 30-<br>F11       | FACS (1:200)           |

|                           |                       |                                                                   |                                                       |                                                                                                                 |
|---------------------------|-----------------------|-------------------------------------------------------------------|-------------------------------------------------------|-----------------------------------------------------------------------------------------------------------------|
|                           |                       |                                                                   | RRID:AB_27<br>44774                                   |                                                                                                                 |
| Antibody                  | Anti-EPCAM<br>BV421   | Biolegend                                                         | Cat: 118225<br>Clone: G8.8<br>RRID:AB_25<br>63983     | FACS (1:200)                                                                                                    |
| Antibody                  | Anti-EPCAM<br>APC     | Biolegend                                                         | Cat: 118214<br>Clone: G8.8<br>RRID:AB_11<br>34102     | FACS (1:200)                                                                                                    |
| Antibody                  | Anti-CD49f<br>FITC    | Biolegend                                                         | Cat: 313606<br>Clone: GoH3<br>RRID:AB_34<br>5300      | FACS (1:200)                                                                                                    |
| Antibody                  | Anti-CD49f<br>APC     | Biolegend                                                         | Cat: 313616<br>Clone: GoH3<br>RRID:AB_15<br>75047     | FACS (1:200)                                                                                                    |
| Antibody                  | Anti-CD24<br>BV786    | BD<br>Biosciences                                                 | Cat: 744470<br>Clone:<br>M1/69<br>RRID:AB_27<br>42258 | FACS (1:200)                                                                                                    |
| Sequence-based<br>reagent | MULTI-seq<br>reagents | Zev Gartner<br>lab<br><br>McGinnis,<br>Patterson, et<br>al., 2019 |                                                       |                                                                                                                 |
| Software,<br>algorithm    | R v3.6.3              | CRAN R<br>Project                                                 | SCR_001905                                            | <a href="https://cran.r-project.org">https://cran.r-project.org</a>                                             |
| Software,<br>algorithm    | deMULTIplex           | McGinnis,<br>Patterson, et<br>al., 2019                           |                                                       | <a href="https://github.com/chris-mcginnis-ucsf/MULTI-seq">https://github.com/chris-mcginnis-ucsf/MULTI-seq</a> |

|                     |                       |                                |            |                                                                                                                                               |
|---------------------|-----------------------|--------------------------------|------------|-----------------------------------------------------------------------------------------------------------------------------------------------|
| Software, algorithm | DoubletFinder         | McGinnis, Murrow, et al., 2019 | SCR_018771 | <a href="https://github.com/chris-mcginnis-ucsf/DoubletFinder">https://github.com/chris-mcginnis-ucsf/DoubletFinder</a>                       |
| Software, algorithm | Seurat v3.1.5         | Rahul Satija lab               | SCR_016341 | <a href="https://github.com/satijalab/seurat">https://github.com/satijalab/seurat</a>                                                         |
| Software, algorithm | Scanpy v1.4.6<br>PAGA | Wolf et al., 2019              | SCR_018139 | <a href="https://scanpy.readthedocs.io/en/stable/">https://scanpy.readthedocs.io/en/stable/</a>                                               |
| Software, algorithm | AUCell v1.8.0         | Aibar et al., 2017             |            | <a href="https://github.com/aertslab/AUCell">https://github.com/aertslab/AUCell</a>                                                           |
| Software, algorithm | scater v1.14.6        | Bioconductor                   | SCR_015954 | <a href="https://bioconductor.org/packages/release/bioc/html/scater.html">https://bioconductor.org/packages/release/bioc/html/scater.html</a> |
| Software, algorithm | QuPath v0.2           | Bankhead et al., 2017          | SCR_018257 | <a href="https://qupath.github.io/">https://qupath.github.io/</a>                                                                             |
| Software, algorithm | Cellranger v3.1.0     | 10x Genomics                   | SCR_017344 |                                                                                                                                               |
| Software, algorithm | FlowJo v10            | BD Life Sciences               | SCR_008520 |                                                                                                                                               |
| Software, algorithm | Harmony               | PerkinElmer                    | SCR_018809 |                                                                                                                                               |
| Software, algorithm | Graphpad Prism v8.4.2 | Graphpad                       | SCR_002798 |                                                                                                                                               |



448 **Animal work**

449 Animal experiments were approved by the Animal Welfare and Ethics Review Body  
450 (AWERB) of the Cancer Research UK Manchester Institute and conducted according to the UK  
451 Home Office Project Licence (PPL 70/8580). Genetic lineage-tracing experiments were  
452 performed at the Beatson Biological Services Unit (PPL 70/8645 & P5EE22AEE) and approved by  
453 the University of Glasgow AWERB. Mice were maintained in purpose-built facility in a 12-hour  
454 light/dark cycle with continual access to food and water.

455  
456 Immunocompetent wild-type ICR (CD-1) mice were purchased from Envigo. P1-*Runx1*:GFP  
457 and P2-*Runx1*:RFP have been described previously (Draper et al., 2018; Sroczynska et al., 2009).  
458 Colonies were maintained on a ICR (CD-1) background. C57Bl/6J *Runx1*<sup>mER-CRE-mER</sup> (Samokhvalov  
459 et al., 2007) were provided by RIKEN (Japan). C57Bl/6J *Rosa26*<sup>flox-stop-flox-tdRFP</sup> mice (Luche et al.,  
460 2007) were acquired from the European Mouse Mutant Archive (EMMA). For all transgenic  
461 lines, routine genotyping was undertaken at weaning (3 weeks of age) by automated PCR  
462 genotyping (Transnetyx). For timed mating experiments, vaginal plug detection was considered  
463 as embryonic day (E) 0.5.

464  
465 All animal procedures were performed on adult males at least 7 weeks of age. Surgical  
466 castration was carried out under aseptic conditions. For prostate regeneration assays,  
467 testosterone pellets (Belma Technologies) were implanted subcutaneously. For *in vivo* genetic  
468 lineage-tracing experiments, tamoxifen (Sigma, T5648) was resuspended in ethanol and diluted

469 in corn oil at a concentration of 10 mg/mL and administered via intra-peritoneal injections daily  
470 for 4 consecutive days using the following regimen: 3mg, 2mg, 2mg, 2mg.

471

## 472 **Isolation of mouse prostate cells**

473 All dissections were performed under a stereo microscope in sterile PBS. Dissociated murine  
474 prostate cells were obtained by digesting pre-minced prostate tissue for 1h at 37°C in digestive  
475 medium prepared in prepared in ADMEM/F12 (Gibco), and containing 1mg/mL Collagenase  
476 Type I (ThermoFischer Scientific, #17018029), 1mg/mL Dispase II (ThermoFischer Scientific,  
477 #17105041), 10% Fetal Bovine Serum (Gibco), 1% Penicillin-Streptomycin-Glutamine (Sigma),  
478 and 10 µM Y-27632 dyhydrochloride (Chemdea, #CD0141). For embryonic urogenital sinuses  
479 (UGS), dissociation time was reduced to 30 min. Single cells were obtained after an additional  
480 10 min incubation in TrypLE (Gibco) at 37°C before mechanical dissociation with a syringe and  
481 needle (25G). Cells were then filtered through a 50 µm cell strainer.

482

## 483 **Flow-cytometry and cell-sorting**

484 Single cell suspensions were kept in Advanced DMEM/F-12 (Gibco) containing 5% FBS  
485 supplemented with 10 µM Y-27632. Cells were incubated for 10 min using unconjugated anti-  
486 mouse CD16/32 antibody (Biolegend, C93, #101301) at 4°C prior to labelling with specific  
487 fluorochrome-labelled antibodies. Details of FACS reagents and antibodies are listed in the Key  
488 Resources Table. Cells were filtered through a 50 µm cell strainer prior to acquisition. Hoechst  
489 33258 or Sytox blue (ThermoFischer Scientific) were used as viability stains. Single-cell

490 suspensions were analyzed on a Fortessa (BD Biosciences) and sorts were performed on a  
491 FACSARIAIII (BD Biosciences). FACS data were analyzed using FlowJo software (BD Life Sciences).

492

### 493 **Organoid formation assays**

494 *In vitro* organoid formation assays were performed as described in Drost et al., 2016. Single  
495 cells were resuspended in 40  $\mu$ L drops of phenol red-free Cultrex RGF BME Type 2 (BME 2,  
496 Amsbio, #3533-005-02), and seeded in CellCarrier-96 Ultra Microplates (PerkinElmer,  
497 #6055302). Defined organoid culture medium was prepared with Advanced DMEM/F-12  
498 (Gibco), supplemented with 10 mM Hepes (Sigma), Gutamax (Gibco), Penicillin/Streptomycin  
499 (Sigma), B27 (Life Technologies, 17504-044), 50 mg/mL EGF (PeproTech, #AF-100-15), 500  
500 ng/mL R-spondin 1 (R&D Systems, #4645-RS), 100 ng/mL Noggin (R&D Systems, #6057-NG), 10  
501 mM Y-27632 dihydrochloride (Chemdea, #CD0141), 200nM A83-01 (Tocris Bioscience, #2939),  
502 1.25 mM N-Acetylcystein (Sigma), and 1 nM Dihydrotestosterone (DHT, Sigma #730637).  
503 Medium was refreshed every 2-3 days, and organoid cultures were scored after 7 days.

504

### 505 **UGS explant cultures**

506 UGS explant cultures were performed as described previously (Kruithof-de Julio et al.,  
507 2013). Briefly, E15.5 embryos were obtained from timed matings. Urogenital sinuses (UGS)  
508 were isolated from the embryos and cultured using a Durapore Membrane Filter 0.65  $\mu$ m  
509 (#DVPP02500) placed on a stainless-steel mesh for up to 7 days in Ham's F-12/DMEM (Gibco)  
510 supplemented with Insulin-Transferrin-Sodium Selenite Supplement (Roche) and 10  $\mu$ M  
511 dihydrotestosterone (Sigma). Media were renewed every 2-3 days. For lineage-tracing

512 experiments, tamoxifen-induced labelling was performed using 0.5  $\mu$ M 4-hydroxytamoxifen  
513 (#T176, Sigma).

514

## 515 **Immunohistochemistry**

516 Prostate tissues were harvested and fixed in 10% buffered formalin for 24h. Fixed tissues  
517 were processed using standard procedures and embedded in paraffin. Formalin-fixed paraffin-  
518 embedded (FFPE) sections (4  $\mu$ m) were cut and dried overnight at 37°C. Multiplexed  
519 immunofluorescent stainings of FFPE sections were performed on an automated Leica BOND RX  
520 platform using the Opal multiplexing workflow (PerkinElmer). In brief, sections were dewaxed,  
521 and rehydrated, and endogenous peroxidase activity was quenched by 10 min pre-treatment  
522 with 3% hydrogen peroxide diluted in TBS-T (Tris-Buffered Saline 0.05% Tween-20). Following  
523 on-board heat-induced epitope retrieval with citrate buffer (pH 6.0) for 20 min, sections were  
524 incubated for 10 min with 10% Casein (Vector Laboratories) diluted in TBS-T. Each staining cycle  
525 included a primary antibody incubation for 30 min, followed by buffer washes, and 30 min  
526 incubation with HRP labelled secondary antibodies (Key Resources Table). After further washes,  
527 the Tyramide labeled with a fluorophore (Opal 520, Opal 570 or Opal 650, PerkinElmer) was  
528 added for a final 10 min. Subsequent antibody stainings were performed by repeating the same  
529 procedure, separated by heat-mediated antibody denaturation using citrate buffer (pH 6.0) for  
530 5 min at 95°C. Nuclei were counterstained with DAPI (Sigma) and slides were sealed using  
531 ProLong Gold Antifade Mountant (ThermoFischer Scientific). *In situ* hybridization (ISH) to detect  
532 *Nupr1* (ACD, LS 2.5 Mm-Nupr1 #434818) was done using the Multiplex Fluorescent detection kit  
533 (ACD) on the automated Leica BOND RX platform following the manufacturer's instructions.

534 Pre-treatment was done using an EDTA based pH 9.0 epitope retrieval solution for 15 min at  
535 88°C followed by 10 min protease incubation. After ISH, antibody staining was carried out using  
536 an anti-RFP antibody for 1h detected with EnVision HRP anti-rabbit secondary (Agilent)  
537 followed by incubation with Tyramide-conjugated Opal 570 (PerkinElmer) as described above.  
538 Anti-CDH1 antibody was applied for 1h and detected using an anti-goat Alexa Fluor 647  
539 secondary antibody (ThermoFischer Scientific, #A-21447). Staining of frozen sections was  
540 performed as described previously (Thambyrajah et al., 2016). The list of antibodies used is  
541 available in the Key Resources Table.

542

#### 543 **Image acquisition and analysis**

544 Whole-slide images were acquired on an Olympus VS120 slide scanner. Images were  
545 analyzed using QuPath v0.2 (Bankhead et al., 2017). Briefly, annotations were drawn manually  
546 to select areas of interest. Nuclear detection was achieved using the “cell detection” module on  
547 the DAPI channel. A classifier was then trained for each batch of images using the random  
548 forest algorithm, to detect the epithelial layers based on either CDH1 or K5/K8 stainings. Single-  
549 cell intensity measurements were analyzed using R (3.6.3). For Quantitative Imaged-Based  
550 Cytometry (QBIC), single-cell intensity measurements were  $\log_{10}$  transformed and plotted using  
551 the ‘geom\_hex’ function of the ggplot2 R package. QuPath was used to extract representative  
552 high-quality raw images of selected areas from whole slide images using the ‘Send region to  
553 ImageJ’ tool. Images used for publication were processed with ImageJ (NIH Image, Maryland,  
554 USA). Confocal images were acquired using a Leica TCS SP8 confocal microscope and LAS X Leica  
555 software. Images of whole UGS explant culture were taken using a Leica MZ FLIII microscope.

556

## 557 **Whole-mount immunofluorescent staining of organoids**

558 Whole-mount staining was adapted from Yokomizo et al., 2012. Organoids were fixed  
559 directly in 96-well plates using 4% paraformaldehyde for 1h at 4°C. After 3 washes of 5 min in  
560 PBS, organoids were incubated in PBS-BST, containing PBS, 1% milk, 1% BSA, 10% goat serum  
561 (Agilent, #X090710), 0.4% Triton X-100. Pre-conjugated primary antibodies, K5 Alexa Fluor 647  
562 (#ab193895, Abcam) and K8 Alexa Fluor 488 (#ab192467, Abcam) were diluted at 1/400 in PBS-  
563 BST and incubated with the organoids overnight at 4°C on a rocking platform. After 3 washes of  
564 1h in PBS-BST at 4°C, organoids were stained with DAPI at 2 µg/mL diluted in PBS-BST and  
565 incubated for another 30 min at 4°C on a rocking platform. Images were acquired on an Opera  
566 Phenix High Content Screening System using the 10x air and 20x water lenses. Quantitative  
567 analysis was performed using the Harmony software on maximum projection images.

568

## 569 **scRNA-seq sample preparation**

570 A detailed description of the samples, replicates, and the corresponding cellular populations  
571 used for each sequencing run is provided in Supplementary file 1. For the adult mouse prostate  
572 dataset, AP, DLP, and VP lobes were micro dissected and pooled from P2-*Runx1*:RFP reporter  
573 mice after dissociation. Single live EPCAM<sup>+</sup> cells from RFP<sup>+</sup> and RFP<sup>-</sup> fractions of each lobes were  
574 sorted separately (containing a mix of CD49f<sup>high</sup> basal and CD24<sup>high</sup> luminal cells). For the UGS  
575 explant culture dataset, the middle regions of the explants were micro dissected to enrich for  
576 prostatic branching events and pooled by time point after dissociation. Single live EPCAM<sup>+</sup> cells  
577 were sorted for each independent time point.

578

579 **scRNA-seq sample multiplexing**

580 Individually sorted populations were multiplexed using the MULTI-seq protocol (McGinnis,  
581 Patterson, et al., 2019). Reagents were kindly provided by Dr. Zev Gartner. In brief, after  
582 sorting, cells were washed once in cold serum- and BSA-free PBS. A lipid-modified DNA  
583 oligonucleotide and a specific sample barcode oligonucleotide were then mixed and added to  
584 the cells at a final concentration of 200 nM each, and incubated in cold PBS for 5 min. Each  
585 individual sample to be multiplexed received an independent sample barcode. Next, a common  
586 lipid-modified co-anchor was added at 200 nM to each sample to stabilize the membrane  
587 bound barcodes. After an additional 5 min incubation on ice, cells were washed 2 times with  
588 PBS containing 1% FBS 1% BSA in order to quench unbound barcodes. Samples were then  
589 pooled together and washed once with PBS 1% FBS 1% BSA. After cell counting, cells were  
590 loaded in a Chromium Single Cell 3' GEM Library & Gel Bead Kit v3 (10x Genomics).

591

592 **scRNA-seq library preparation, sequencing and pre-processing**

593 Gene expression (cDNA) libraries were prepared according to the manufacturer's protocol.  
594 MULTI-seq barcode libraries were separated from the cDNA libraries during the first round of  
595 size selection, and PCR amplified prior to sequencing according to the MULTI-seq library  
596 preparation protocol (McGinnis, Patterson, et al., 2019). For the adult mouse prostate dataset,  
597 cDNA libraries of 'run 1' and 'run 2' were sequenced on Illumina NovaSeq 6000 System, and  
598 'run 3' was sequenced on Illumina HiSeq 2500. The UGS mouse prostate explant run was also  
599 sequenced on Illumina HiSeq 2500. Sequencing data of cDNA libraries were processed using

600 Cellranger v3.1.0 and mapped onto mm10 mouse reference genome. Pre-processing of the  
601 MULTI-seq library fastq files was performed using the 'deMULTIplex' (v1.0.2) R package  
602 (<https://github.com/chris-mcginnis-ucsf/MULTI-seq>) to generate a sample barcode UMI count  
603 matrix. Detailed quality control metrics of each sequencing run are provided in Supplementary  
604 file 1.

605

### 606 **Adult mouse prostate dataset analysis**

607 *Quality control and barcode demultiplexing of individual runs.* Each run was pre-processed  
608 individually prior data integration. Cellranger outputs were loaded into the R package Seurat  
609 (v3.1.5). Cells were kept if they had more than 750 detected genes, less than 7500 UMIs and  
610 less than 10% mitochondrial transcripts. Sample barcodes were demultiplexed using the  
611 HTODemux function implemented in Seurat. Briefly, a negative binomial distribution was used  
612 to estimate the background levels based on *k*-means clustering of the barcode normalized  
613 counts. Barcodes with values above the 99% quantile were considered 'positive' for a given  
614 sample. Cells positive for more than one barcode were considered as 'doublets'. Doublets and  
615 negative cells were excluded for all downstream analyses. Thresholds were empirically adjusted  
616 to remove additional cells with possible ambiguous classification (Supplementary file 1). Of  
617 note, in both 'run 1' and 'run 2', a large number of cells were classified 'negative' due to the  
618 failed labelling of 'Bar3' (corresponding to 'Intact DLP RFP+' sample). For these runs, we used  
619 DoubletFinder (McGinnis, Murrow, et al., 2019) to remove predicted doublets missed out as a  
620 consequence of the failed labeling of 'Bar3'. After classification, barcodes were represented in



621 UMAP space to confirm the purity of the barcode assignment obtained for each sample (Figure  
622 3–figure supplement 5A). We obtained a total of 4,499 cells from 3 independent experiments.  
623  
624 *Integration, low dimensional embedding and clustering.* Data aggregation was performed  
625 according to the standard integration procedure implemented in Seurat. In brief, each dataset  
626 was log normalized, and 3000 variable features were initially computed using the ‘vst’ method.  
627 For integration, 2000 features and 50 dimensions were used as anchors. Integrated data were  
628 scaled and the first 50 principal components (PC) were calculated for downstream analyses.  
629 Uniform Manifold Approximation and Projection (UMAP) (McInnes et al., 2018) was used for  
630 visualization. Graph-based louvain clustering was performed on a shared nearest neighbor  
631 graph constructed using 20 nearest neighbors for every cell, and a resolution of 0.4, which gave  
632 a reasonable segmentation of the data (Figure 3–figure supplement 5B,C). Extensive  
633 exploration of each cluster based on known marker genes was then carried out to subset  
634 prostate epithelial cells. We found 10 prostate epithelial clusters (*Epcam*, *Krt8*, *Cd24a*, *Spink1*,  
635 *Krt19*, *Tacstd2*, *Psca*, *Krt4*, *Tgm4*, *Nkx3-1*, *Pbsn*, *Msemb*, *Piezo2*, *Trp63*, *Krt5*, *Krt14*), 3 clusters of  
636 hematopoietic cells (*Vim*, *Ptprc*, *Cd74*, *Itgam*, *Cd3d*), 1 cluster of endothelial cells (*Pecam1*), 1  
637 cluster of fibroblasts (*Vim*, *Col1a1*) and 1 cluster of mesonephric derivatives (*Svs2*, *Pax2*) (Figure  
638 3–figure supplement 5D,E).  
639  
640 *Analysis of prostate epithelial populations.* The same dimension reduction approach described  
641 above was performed on the selected prostate epithelial clusters, using a resolution of 0.3 for  
642 graph-based louvain clustering. We annotated 1 large population of basal cells by merging 3

643 subclusters highly expressing *Krt5*, *Krt14* and *Trp63* as we did not discuss the heterogeneity of  
644 the basal compartment in this study (Figures 3B-D; Figure 3–figure supplement 6F,I). We  
645 annotated the different luminal clusters expressing higher levels of *Cd26/Dpp4*, *Cd24a*, *Krt8* and  
646 *Krt18*, as Lum-A, Lum-B, Lum-C, Lum-D, Lum-E and Lum-F. Several genes specifically marked  
647 each cluster, including *Sbp/Spink1* in Lum-A, *Tgm4* in Lum-B, *Msmb* in Lum-C, *Psc4/Krt4* in Lum-  
648 D, *Basp1/Lpl* in Lum-E, and *Crym* in Lum-F (Figures 3C, D; Figure 3–figure supplement 7A). Data  
649 were then imported in Scanpy (v1.4.6) to infer lineage relationships between cellular  
650 populations via partition-based graph abstraction (PAGA) implemented in the `tl.paga` function  
651 (Wolf et al., 2019). Briefly, a single cell neighborhood graph (`n_neighbors = 50`) was computed  
652 using the integrated principal components previously calculated in Seurat. PAGA was generated  
653 based on our annotated clusters. The final UMAP representation was generated using PAGA-  
654 initialised positions to better preserve the global topology of the data. All final data  
655 visualizations were generated in R.

656

657 *Differential gene expression analysis and gene ontology.* Differential gene expression analyses  
658 between clusters were performed using the MAST method (Finak et al., 2015) implemented in  
659 Seurat within the ‘FindAllMarkers’ and ‘FindMarkers’ functions. Testing was limited to genes  
660 detected in at least 25% of the tested populations (`min.pct = 0.25`) and showing at least  $\pm 0.25$   
661 log fold change difference (`logfc.threshold = 0.25`). The ‘`g:GOST`’ function of the `gprofiler2` R  
662 package was used to perform functional enrichment analysis on gene ontology terms (GO:BP,  
663 biological processes). Genes showing at least 0.50 log fold change enrichment in the group  
664 tested were kept.

665

666 **UGS explant cultures dataset**

667 A similar strategy was applied for the analysis of the UGS explant culture dataset, with some  
668 alterations described below.

669

670 *Quality control and barcode demultiplexing.* Cells were kept if they had more than 1000  
671 detected genes, and less than 7.5% mitochondrial transcripts. Barcode classification was  
672 performed as above, using the 90% quantile in 'HTODemux' (Figure 6–figure supplement 12A).

673 We obtained a total of 5,122 cells that passed quality control from the 4 time points.

674

675 *Low dimensional embedding and clustering.* The first 50 principal components and 20 neighbors  
676 were used for UMAP visualization. Graph-based clustering was done using a resolution  
677 parameter of 0.3. We noticed a strong effect of cell cycle using cell cycles genes defined in  
678 Tirosh et al., 2016. This was particularly evident using the 'CellCycleScoring' function  
679 implemented in Seurat (Figure 6–figure supplement 12B). To minimize the impact of cell cycle  
680 on downstream analyses, the cell cycle scores were regressed out during data scaling. We  
681 identified 6 main clusters, that we annotated based on the expression of several marker genes  
682 (Figure 6–figure supplement 12C-E). We identified 2 clusters of developing mesonephric  
683 derivatives (*Hoxb7, Wfdc2, Gata3, Sox17, Pax2, Pax8, Lhx1*), 1 cluster of developing bladder  
684 urothelium (*Upk3a, Foxq1, Plaur, Krt7, Krt20*), 1 cluster of mesenchymal cells (*Vim, Col3a1,*  
685 *Col1a1, Pdgfra, Zeb1*) and 1 cluster corresponding to the developing prostatic epithelium

686 (*Epcam, Krt8, Krt5, Krt14, Krt15, Shh, Hoxb13, Hoxd13, Nkx3-1*). We also identified one cluster  
687 largely associated with hypoxia and cellular stress ontologies (Figure 6–figure supplement 12F).

688

689 *Analysis of the developing prostatic epithelium.* The same dimension reduction approach was  
690 initially applied on the developing prostatic cluster. After graph-based clustering using a  
691 resolution of 0.5, 10 clusters were identified and visualized via UMAP (Figure 6–figure  
692 supplement 12G-J). We computed diffusion components using ‘runDiffusionMap’  
693 (ncomponents = 20, k = 20) implemented in the scater (v1.14.6) R package. We found the small  
694 cluster C9 to be largely diverging from the remainder fraction in diffusion space, therefore it  
695 was excluded for downstream analysis (Figure 6–figure supplement 12K). We then imported  
696 the data in Scanpy and used the first 10 diffusion components to compute a neighborhood  
697 graph (n\_neighbors = 20) which was used for PAGA. We finally computed a force-direct layout  
698 (ForceAtlas2) using PAGA-initialised positions.

699

700 *Analysis of gene set activity.* Gene signatures were generated from the list of differentially  
701 expressed genes by keeping those showing at least 0.50 log fold change enrichment in each  
702 given group. Gene lists were used as custom gene sets (Supplementary file 5) in the AUCell  
703 (Aibar et al., 2017) R package (v1.8.0). Briefly, AUCell uses the Area Under the Curve to evaluate  
704 the enrichment of a given gene set in each cell, in a ranking based manner. It outputs an AUC  
705 score for each individual cell, which is used to explore the relative expression of the signature.  
706 Per cell AUC scores of each signatures were overlaid on the dimension reduction layout and  
707 plotted as boxplots to visualize enrichments across the different cellular subsets.

708

709 **Data availability**

710 Raw sequencing files and processed gene expression matrices have been deposited in the  
711 NCBI Gene Expression Omnibus under the accession number GSE151944. The processed  
712 datasets for both mouse adult prostate and UGS prostate explant cultures can be accessed via a  
713 searchable R Shiny application available at <http://shiny.cruk.manchester.ac.uk/pscapp/>. All  
714 code used to process data and generate figures is available on a public GitHub repository at  
715 <https://github.com/glacaud/prostate-scRNAseq>.

716

717 **Statistical analyses**

718 Statistical analyses were performed using Graphpad/Prism (v8.4.2). Data are  
719 represented as mean  $\pm$ SD. Unless otherwise specified in the corresponding figure legend, two-  
720 tailed unpaired *t*-tests were used to compare means between two groups. Statistical  
721 significance was set at  $p < 0.05$ . For animal model studies, no statistical method was used to  
722 pre-determine the sample size. No randomization or blinding was used for *in vivo* studies.

723

724 **ACKNOWLEDGEMENTS**

725 We thank the laboratories' members for critical reading of the manuscript, in particular Dr.  
726 Michael Lie-a-ling, Dr. Alice Lallo and Catherine Winchester. We thank the staff at the Histology,  
727 Flow Cytometry, Advanced Imaging, Molecular Biology, and Breeding Unit Core facilities of  
728 CRUK Manchester Institute, as well as the CRUK Beatson Biological Services Unit and Flow  
729 Cytometry Core facility for technical support. We thank Dr. Zev Gartner for kindly providing the  
730 MULTI-seq reagents. We thank Dr. Kirsteen Campbell with assistance on the lineage tracing  
731 experiments. We thank Dr. Berenika Plusa and Dr. Roberto de la Fuente with assistance on  
732 timed matings experiments. We thank Professor Hans Jorg Fehling and the European Mouse  
733 Mutant Archive for providing the Rosa26<sup>flox-stop-flox-tdRFP</sup> mice.

734

735 **COMPETING INTERESTS**

736 The authors declare no competing interests.

737

738 **REFERENCES**

- 739 Aibar, S., González-Blas, C. B., Moerman, T., Huynh-Thu, V. A., Imrichova, H., Hulselmans, G.,  
740 Rambow, F., Marine, J.-C., Geurts, P., Aerts, J., van den Oord, J., Atak, Z. K., Wouters, J.,  
741 & Aerts, S. (2017). SCENIC: Single-cell regulatory network inference and clustering.  
742 *Nature Methods*, 14(11), 1083–1086. <https://doi.org/10.1038/nmeth.4463>
- 743 Banach-Petrosky, W., Jessen, W. J., Ouyang, X., Gao, H., Rao, J., Quinn, J., Aronow, B. J., &  
744 Abate-Shen, C. (2007). Prolonged exposure to reduced levels of androgen accelerates  
745 prostate cancer progression in Nkx3.1; Pten mutant mice. *Cancer Research*, 67(19),  
746 9089–9096. <https://doi.org/10.1158/0008-5472.CAN-07-2887>
- 747 Bankhead, P., Loughrey, M. B., Fernández, J. A., Dombrowski, Y., McArt, D. G., Dunne, P. D.,  
748 McQuaid, S., Gray, R. T., Murray, L. J., Coleman, H. G., James, J. A., Salto-Tellez, M., &  
749 Hamilton, P. W. (2017). QuPath: Open source software for digital pathology image  
750 analysis. *Scientific Reports*, 7(1), 16878. <https://doi.org/10.1038/s41598-017-17204-5>
- 751 Barros-Silva, J. D., Linn, D. E., Steiner, I., Guo, G., Ali, A., Pakula, H., Ashton, G., Peset, I., Brown,  
752 M., Clarke, N. W., Bronson, R. T., Yuan, G.-C., Orkin, S. H., Li, Z., & Baena, E. (2018).  
753 Single-Cell Analysis Identifies LY6D as a Marker Linking Castration-Resistant Prostate  
754 Luminal Cells to Prostate Progenitors and Cancer. *Cell Reports*, 25(12), 3504-3518.e6.  
755 <https://doi.org/10.1016/j.celrep.2018.11.069>
- 756 Berman, D. M., Desai, N., Wang, X., Karhadkar, S. S., Reynon, M., Abate-Shen, C., Beachy, P. A.,  
757 & Shen, M. M. (2004). Roles for Hedgehog signaling in androgen production and  
758 prostate ductal morphogenesis. *Developmental Biology*, 267(2), 387–398.  
759 <https://doi.org/10.1016/j.ydbio.2003.11.018>

- 760 Bhatia-Gaur, R., Donjacour, A. A., Sciavolino, P. J., Kim, M., Desai, N., Young, P., Norton, C. R.,  
761 Gridley, T., Cardiff, R. D., Cunha, G. R., Abate-Shen, C., & Shen, M. M. (1999). Roles for  
762 Nkx3.1 in prostate development and cancer. *Genes & Development*, *13*(8), 966–977.
- 763 Browne, G., Taipaleenmäki, H., Bishop, N. M., Madasu, S. C., Shaw, L. M., van Wijnen, A. J.,  
764 Stein, J. L., Stein, G. S., & Lian, J. B. (2015). Runx1 is associated with breast cancer  
765 progression in MMTV-PyMT transgenic mice and its depletion in vitro inhibits migration  
766 and invasion. *Journal of Cellular Physiology*, *230*(10), 2522–2532.  
767 <https://doi.org/10.1002/jcp.24989>
- 768 Burger, P. E., Xiong, X., Coetzee, S., Salm, S. N., Moscatelli, D., Goto, K., & Wilson, E. L. (2005).  
769 Sca-1 expression identifies stem cells in the proximal region of prostatic ducts with high  
770 capacity to reconstitute prostatic tissue. *Proceedings of the National Academy of  
771 Sciences of the United States of America*, *102*(20), 7180–7185.  
772 <https://doi.org/10.1073/pnas.0502761102>
- 773 Centonze, A., Lin, S., Tika, E., Sifrim, A., Fioramonti, M., Malfait, M., Song, Y., Wuidart, A., Van  
774 Herck, J., Dannau, A., Bouvencourt, G., Dubois, C., Dedoncker, N., Sahay, A., de  
775 Maertelaer, V., Siebel, C. W., Van Keymeulen, A., Voet, T., & Blanpain, C. (2020).  
776 Heterotypic cell–cell communication regulates glandular stem cell multipotency. *Nature*,  
777 *584*(7822), 608–613. <https://doi.org/10.1038/s41586-020-2632-y>
- 778 Chimge, N.-O., Little, G. H., Baniwal, S. K., Adisetiyo, H., Xie, Y., Zhang, T., O’Laughlin, A., Liu, Z.  
779 Y., Ulrich, P., Martin, A., Mhawech-Fauceglia, P., Ellis, M. J., Tripathy, D., Groshen, S.,  
780 Liang, C., Li, Z., Schones, D. E., & Frenkel, B. (2016). RUNX1 prevents oestrogen-



781 mediated AXIN1 suppression and  $\beta$ -catenin activation in ER-positive breast cancer.  
782 *Nature Communications*, 7, 10751. <https://doi.org/10.1038/ncomms10751>

783 Choi, N., Zhang, B., Zhang, L., Ittmann, M., & Xin, L. (2012). Adult murine prostate basal and  
784 luminal cells are self-sustained lineages that can both serve as targets for prostate  
785 cancer initiation. *Cancer Cell*, 21(2), 253–265. <https://doi.org/10.1016/j.ccr.2012.01.005>

786 Chua, C. W., Shibata, M., Lei, M., Toivanen, R., Barlow, L. J., Bergren, S. K., Badani, K. K.,  
787 McKiernan, J. M., Benson, M. C., Hibshoosh, H., & Shen, M. M. (2014). Single luminal  
788 epithelial progenitors can generate prostate organoids in culture. *Nature Cell Biology*,  
789 16(10), 951–961, 1–4. <https://doi.org/10.1038/ncb3047>

790 Clevers, H., & Watt, F. M. (2018). Defining Adult Stem Cells by Function, not by Phenotype.  
791 *Annual Review of Biochemistry*, 87(1), 1015–1027. <https://doi.org/10.1146/annurev-biochem-062917-012341>

792

793 Crowell, P. D., Fox, J. J., Hashimoto, T., Diaz, J. A., Navarro, H. I., Henry, G. H., Feldmar, B. A.,  
794 Lowe, M. G., Garcia, A. J., Wu, Y. E., Sajed, D. P., Strand, D. W., & Goldstein, A. S. (2019).  
795 Expansion of Luminal Progenitor Cells in the Aging Mouse and Human Prostate. *Cell*  
796 *Reports*, 28(6), 1499-1510.e6. <https://doi.org/10.1016/j.celrep.2019.07.007>

797 Crowley, L., Cambuli, F., Aparicio, L., Shibata, M., Robinson, B. D., Xuan, S., Li, W., Hibshoosh, H.,  
798 Loda, M., Rabadan, R., & Shen, M. M. (2020). A single-cell atlas of the mouse and human  
799 prostate reveals heterogeneity and conservation of epithelial progenitors. *ELife*, 9.  
800 <https://doi.org/10.7554/eLife.59465>

- 801 Doles, J. D., Vezina, C. M., Lipinski, R. J., Peterson, R. E., & Bushman, W. (2005). Growth,  
802 morphogenesis, and differentiation during mouse prostate development in situ, in renal  
803 grafts, and in vitro. *The Prostate*, *65*(4), 390–399. <https://doi.org/10.1002/pros.20321>
- 804 Draper, J. E., Sroczyńska, P., Fadlullah, M. Z. H., Patel, R., Newton, G., Breitwieser, W., Kouskoff,  
805 V., & Lacaud, G. (2018). A novel prospective isolation of murine fetal liver progenitors to  
806 study in utero hematopoietic defects. *PLoS Genetics*, *14*(1), e1007127.  
807 <https://doi.org/10.1371/journal.pgen.1007127>
- 808 Drost, J., Karthaus, W. R., Gao, D., Driehuis, E., Sawyers, C. L., Chen, Y., & Clevers, H. (2016).  
809 Organoid culture systems for prostate epithelial and cancer tissue. *Nature Protocols*,  
810 *11*(2), 347–358. <https://doi.org/10.1038/nprot.2016.006>
- 811 English, H. F., Santen, R. J., & Isaacs, J. T. (1987). Response of glandular versus basal rat ventral  
812 prostatic epithelial cells to androgen withdrawal and replacement. *The Prostate*, *11*(3),  
813 229–242.
- 814 Ferrari, N., Mohammed, Z. M. A., Nixon, C., Mason, S. M., Mallon, E., McMillan, D. C., Morris, J.  
815 S., Cameron, E. R., Edwards, J., & Blyth, K. (2014). Expression of RUNX1 Correlates with  
816 Poor Patient Prognosis in Triple Negative Breast Cancer. *PLoS ONE*, *9*(6), e100759.  
817 <https://doi.org/10.1371/journal.pone.0100759>
- 818 Finak, G., McDavid, A., Yajima, M., Deng, J., Gersuk, V., Shalek, A. K., Slichter, C. K., Miller, H. W.,  
819 McElrath, M. J., Prlic, M., Linsley, P. S., & Gottardo, R. (2015). MAST: A flexible statistical  
820 framework for assessing transcriptional changes and characterizing heterogeneity in  
821 single-cell RNA sequencing data. *Genome Biology*, *16*(1), 278.  
822 <https://doi.org/10.1186/s13059-015-0844-5>

- 823 Georgas, K. M., Armstrong, J., Keast, J. R., Larkins, C. E., McHugh, K. M., Southard-Smith, E. M.,  
824 Cohn, M. J., Batourina, E., Dan, H., Schneider, K., Buehler, D. P., Wiese, C. B., Brennan, J.,  
825 Davies, J. A., Harding, S. D., Baldock, R. A., Little, M. H., Vezina, C. M., & Mendelsohn, C.  
826 (2015). An illustrated anatomical ontology of the developing mouse lower urogenital  
827 tract. *Development (Cambridge, England)*, *142*(10), 1893–1908.  
828 <https://doi.org/10.1242/dev.117903>
- 829 Goldstein, A. S., Lawson, D. A., Cheng, D., Sun, W., Garraway, I. P., & Witte, O. N. (2008). Trop2  
830 identifies a subpopulation of murine and human prostate basal cells with stem cell  
831 characteristics. *Proceedings of the National Academy of Sciences of the United States of*  
832 *America*, *105*(52), 20882–20887. <https://doi.org/10.1073/pnas.0811411106>
- 833 Goto, K., Salm, S. N., Coetzee, S., Xiong, X., Burger, P. E., Shapiro, E., Lepor, H., Moscatelli, D., &  
834 Wilson, E. L. (2006). Proximal Prostatic Stem Cells Are Programmed to Regenerate a  
835 Proximal-Distal Ductal Axis. *STEM CELLS*, *24*(8), 1859–1868.  
836 <https://doi.org/10.1634/stemcells.2005-0585>
- 837 Guo, W., Li, L., He, J., Liu, Z., Han, M., Li, F., Xia, X., Zhang, X., Zhu, Y., Wei, Y., Li, Y., Aji, R., Dai,  
838 H., Wei, H., Li, C., Chen, Y., Chen, L., & Gao, D. (2020). Single-cell transcriptomics  
839 identifies a distinct luminal progenitor cell type in distal prostate invagination tips.  
840 *Nature Genetics*, *52*(9), 908–918. <https://doi.org/10.1038/s41588-020-0642-1>
- 841 Höfner, T., Eisen, C., Klein, C., Rigo-Watermeier, T., Goeppinger, S. M., Jauch, A., Schoell, B.,  
842 Vogel, V., Noll, E., Weichert, W., Baccelli, I., Schillert, A., Wagner, S., Pahernik, S., Sprick,  
843 M. R., & Trumpp, A. (2015). Defined Conditions for the Isolation and Expansion of Basal

- 844 Prostate Progenitor Cells of Mouse and Human Origin. *Stem Cell Reports*, 4(3), 503–518.  
845 <https://doi.org/10.1016/j.stemcr.2015.01.015>
- 846 Horton, C., Liu, Y., Yu, C., Xie, Q., & Wang, Z. A. (2019). Luminal-contact-inhibition of epithelial  
847 basal stem cell multipotency in prostate organogenesis and homeostasis. *Biology Open*,  
848 8(10). <https://doi.org/10.1242/bio.045724>
- 849 Joseph, D. B., Henry, G. H., Malewska, A., Iqbal, N. S., Ruetten, H. M., Turco, A. E., Ablner, L. L.,  
850 Sandhu, S. K., Cadena, M. T., Malladi, V. S., Reese, J. C., Mauck, R. J., Gahan, J. C.,  
851 Hutchinson, R. C., Roehrborn, C. G., Baker, L. A., Vezina, C. M., & Strand, D. W. (2020).  
852 Urethral luminal epithelia are castration-insensitive cells of the proximal prostate. *The*  
853 *Prostate*. <https://doi.org/10.1002/pros.24020>
- 854 Karthaus, W. R., Hofree, M., Choi, D., Linton, E. L., Turkekul, M., Bejnood, A., Carver, B.,  
855 Gopalan, A., Abida, W., Laudone, V., Biton, M., Chaudhary, O., Xu, T., Masilionis, I.,  
856 Manova, K., Mazutis, L., Pe'er, D., Regev, A., & Sawyers, C. L. (2020). Regenerative  
857 potential of prostate luminal cells revealed by single-cell analysis. *Science*, 368(6490),  
858 497–505. <https://doi.org/10.1126/science.aay0267>
- 859 Karthaus, W. R., Iaquinta, P. J., Drost, J., Gracanin, A., van Boxtel, R., Wongvipat, J., Dowling, C.  
860 M., Gao, D., Begthel, H., Sachs, N., Vries, R. G. J., Cuppen, E., Chen, Y., Sawyers, C. L., &  
861 Clevers, H. C. (2014). Identification of multipotent luminal progenitor cells in human  
862 prostate organoid cultures. *Cell*, 159(1), 163–175.  
863 <https://doi.org/10.1016/j.cell.2014.08.017>
- 864 Keil, K. P., Mehta, V., Ablner, L. L., Joshi, P. S., Schmitz, C. T., & Vezina, C. M. (2012). Visualization  
865 and quantification of mouse prostate development by in situ hybridization.

- 866 *Differentiation; Research in Biological Diversity*, 84(3), 232–239.
- 867 <https://doi.org/10.1016/j.diff.2012.07.005>
- 868 Keita, M., Bachvarova, M., Morin, C., Plante, M., Gregoire, J., Renaud, M.-C., Sebastianelli, A.,  
869 Trinh, X. B., & Bachvarov, D. (2013). The RUNX1 transcription factor is expressed in  
870 serous epithelial ovarian carcinoma and contributes to cell proliferation, migration and  
871 invasion. *Cell Cycle (Georgetown, Tex.)*, 12(6), 972–986.
- 872 <https://doi.org/10.4161/cc.23963>
- 873 Kruithof-de Julio, M., Shibata, M., Desai, N., Reynon, M., Halili, M. V., Hu, Y.-P., Price, S. M.,  
874 Abate-Shen, C., & Shen, M. M. (2013). Canonical Wnt signaling regulates Nkx3.1  
875 expression and luminal epithelial differentiation during prostate organogenesis.  
876 *Developmental Dynamics : An Official Publication of the American Association of*  
877 *Anatomists*, 242(10), 1160–1171. <https://doi.org/10.1002/dvdy.24008>
- 878 Kwon, O.-J., Zhang, L., Ittmann, M. M., & Xin, L. (2014). Prostatic inflammation enhances basal-  
879 to-luminal differentiation and accelerates initiation of prostate cancer with a basal cell  
880 origin. *Proceedings of the National Academy of Sciences of the United States of America*,  
881 111(5), E592-600. <https://doi.org/10.1073/pnas.1318157111>
- 882 Kwon, O.-J., Zhang, L., & Xin, L. (2016). Stem Cell Antigen-1 Identifies a Distinct Androgen-  
883 Independent Murine Prostatic Luminal Cell Lineage with Bipotent Potential. *STEM CELLS*,  
884 34(1), 191–202. <https://doi.org/10.1002/stem.2217>
- 885 Lawson, D. A., Xin, L., Lukacs, R. U., Cheng, D., & Witte, O. N. (2007). Isolation and functional  
886 characterization of murine prostate stem cells. *Proceedings of the National Academy of*

- 887            *Sciences of the United States of America*, 104(1), 181–186.
- 888            <https://doi.org/10.1073/pnas.0609684104>
- 889    Leong, K. G., Wang, B.-E., Johnson, L., & Gao, W.-Q. (2008). Generation of a prostate from a  
890            single adult stem cell. *Nature*, 456(7223), 804–808.
- 891            <https://doi.org/10.1038/nature07427>
- 892    Lie-A-Ling, M., Mevel, R., Patel, R., Blyth, K., Baena, E., Kouskoff, V., & Lacaud, G. (2020). RUNX1  
893            Dosage in Development and Cancer. *Molecules and Cells*, 43(2), 126–138.
- 894            <https://doi.org/10.14348/molcells.2019.0301>
- 895    Lopes, E. S., Foster, B. A., Donjacour, A. A., & Cunha, G. R. (1996). Initiation of secretory activity  
896            of rat prostatic epithelium in organ culture. *Endocrinology*, 137(10), 4225–4234.
- 897            <https://doi.org/10.1210/endo.137.10.8828481>
- 898    Luche, H., Weber, O., Nageswara Rao, T., Blum, C., & Fehling, H. J. (2007). Faithful activation of  
899            an extra-bright red fluorescent protein in ‘knock-in’ Cre-reporter mice ideally suited for  
900            lineage tracing studies. *European Journal of Immunology*, 37(1), 43–53.
- 901            <https://doi.org/10.1002/eji.200636745>
- 902    Lukacs, R. U., Goldstein, A. S., Lawson, D. A., Cheng, D., & Witte, O. N. (2010). Isolation,  
903            cultivation and characterization of adult murine prostate stem cells. *Nature Protocols*,  
904            5(4), 702–713. <https://doi.org/10.1038/nprot.2010.11>
- 905    McAuley, E., Moline, D., VanOpstall, C., Lamperis, S., Brown, R., & Vander Griend, D. J. (2019).  
906            Sox2 Expression Marks Castration-Resistant Progenitor Cells in the Adult Murine  
907            Prostate. *Stem Cells (Dayton, Ohio)*, 37(5), 690–700. <https://doi.org/10.1002/stem.2987>

- 908 McGinnis, C. S., Murrow, L. M., & Gartner, Z. J. (2019). DoubletFinder: Doublet Detection in  
909 Single-Cell RNA Sequencing Data Using Artificial Nearest Neighbors. *Cell Systems*, *8*(4),  
910 329-337.e4. <https://doi.org/10.1016/j.cels.2019.03.003>
- 911 McGinnis, C. S., Patterson, D. M., Winkler, J., Conrad, D. N., Hein, M. Y., Srivastava, V., Hu, J. L.,  
912 Murrow, L. M., Weissman, J. S., Werb, Z., Chow, E. D., & Gartner, Z. J. (2019). MULTI-  
913 seq: Sample multiplexing for single-cell RNA sequencing using lipid-tagged indices.  
914 *Nature Methods*, *16*(7), 619–626. <https://doi.org/10.1038/s41592-019-0433-8>
- 915 McInnes, L., Healy, J., & Melville, J. (2018). UMAP: Uniform Manifold Approximation and  
916 Projection for Dimension Reduction. *ArXiv:1802.03426 [Cs, Stat]*.  
917 <http://arxiv.org/abs/1802.03426>
- 918 McNeal, J. E. (1981). The zonal anatomy of the prostate. *The Prostate*, *2*(1), 35–49.  
919 <https://doi.org/10.1002/pros.2990020105>
- 920 Mevel, R., Draper, J. E., Lie-a-Ling, M., Kouskoff, V., & Lacaud, G. (2019). RUNX transcription  
921 factors: Orchestrators of development. *Development*, *146*(17), dev148296.  
922 <https://doi.org/10.1242/dev.148296>
- 923 Ousset, M., Van Keymeulen, A., Bouvencourt, G., Sharma, N., Achouri, Y., Simons, B. D., &  
924 Blanpain, C. (2012). Multipotent and unipotent progenitors contribute to prostate  
925 postnatal development. *Nature Cell Biology*, *14*(11), 1131–1138.  
926 <https://doi.org/10.1038/ncb2600>
- 927 Pignon, J.-C., Grisanzio, C., Geng, Y., Song, J., Shivdasani, R. A., & Signoretti, S. (2013). P63-  
928 expressing cells are the stem cells of developing prostate, bladder, and colorectal

929 epithelia. *Proceedings of the National Academy of Sciences of the United States of*  
930 *America*, 110(20), 8105–8110. <https://doi.org/10.1073/pnas.1221216110>

931 Planagumà, J., Díaz-Fuertes, M., Gil-Moreno, A., Abal, M., Monge, M., García, A., Baró, T.,  
932 Thomson, T. M., Xercavins, J., Alameda, F., & Reventós, J. (2004). A differential gene  
933 expression profile reveals overexpression of RUNX1/AML1 in invasive endometrioid  
934 carcinoma. *Cancer Research*, 64(24), 8846–8853. [https://doi.org/10.1158/0008-](https://doi.org/10.1158/0008-5472.CAN-04-2066)  
935 [5472.CAN-04-2066](https://doi.org/10.1158/0008-5472.CAN-04-2066)

936 Planagumà, J., Gonzalez, M., Doll, A., Monge, M., Gil-Moreno, A., Baró, T., García, A., Xercavins,  
937 J., Alameda, F., Abal, M., & Reventós, J. (2006). The up-regulation profiles of  
938 p21WAF1/CIP1 and RUNX1/AML1 correlate with myometrial infiltration in endometrioid  
939 endometrial carcinoma. *Human Pathology*, 37(8), 1050–1057.  
940 <https://doi.org/10.1016/j.humpath.2006.03.007>

941 Richardson, G. D., Robson, C. N., Lang, S. H., Neal, D. E., Maitland, N. J., & Collins, A. T. (2004).  
942 CD133, a novel marker for human prostatic epithelial stem cells. *Journal of Cell Science*,  
943 117(16), 3539–3545. <https://doi.org/10.1242/jcs.01222>

944 Riggio, A. I., & Blyth, K. (2017). The enigmatic role of RUNX1 in female-related cancers—Current  
945 knowledge & future perspectives. *The FEBS Journal*, 284(15), 2345–2362.  
946 <https://doi.org/10.1111/febs.14059>

947 Samokhvalov, I. M., Samokhvalova, N. I., & Nishikawa, S. (2007). Cell tracing shows the  
948 contribution of the yolk sac to adult haematopoiesis. *Nature*, 446(7139), 1056–1061.  
949 <https://doi.org/10.1038/nature05725>



- 950 Scheitz, C. J. F., Lee, T. S., McDermitt, D. J., & Tumber, T. (2012). Defining a tissue stem cell-  
951 driven Runx1/Stat3 signalling axis in epithelial cancer. *The EMBO Journal*, *31*(21), 4124–  
952 4139. <https://doi.org/10.1038/emboj.2012.270>
- 953 Scheitz, C. J. F., & Tumber, T. (2013). New insights into the role of Runx1 in epithelial stem cell  
954 biology and pathology. *Journal of Cellular Biochemistry*, *114*(5), 985–993.  
955 <https://doi.org/10.1002/jcb.24453>
- 956 Shen, M. M., & Abate-Shen, C. (2010). Molecular genetics of prostate cancer: New prospects for  
957 old challenges. *Genes & Development*, *24*(18), 1967–2000.  
958 <https://doi.org/10.1101/gad.1965810>
- 959 Sroczynska, P., Lancrin, C., Kouskoff, V., & Lacaud, G. (2009). The differential activities of Runx1  
960 promoters define milestones during embryonic hematopoiesis. *Blood*, *114*(26), 5279–  
961 5289. <https://doi.org/10.1182/blood-2009-05-222307>
- 962 Sugimura, Y., Cunha, G. R., & Donjacour, A. A. (1986a). Morphogenesis of ductal networks in the  
963 mouse prostate. *Biology of Reproduction*, *34*(5), 961–971.  
964 <https://doi.org/10.1095/biolreprod34.5.961>
- 965 Sugimura, Y., Cunha, G. R., & Donjacour, A. A. (1986b). Morphological and histological study of  
966 castration-induced degeneration and androgen-induced regeneration in the mouse  
967 prostate. *Biology of Reproduction*, *34*(5), 973–983.
- 968 Takayama, K., Suzuki, T., Tsutsumi, S., Fujimura, T., Urano, T., Takahashi, S., Homma, Y.,  
969 Aburatani, H., & Inoue, S. (2015). RUNX1, an androgen- and EZH2-regulated gene, has  
970 differential roles in AR-dependent and -independent prostate cancer. *Oncotarget*, *6*(4),  
971 2263–2276. <https://doi.org/10.18632/oncotarget.2949>

- 972 Thambyrajah, R., Mazan, M., Patel, R., Moignard, V., Stefanska, M., Marinopoulou, E., Li, Y.,  
973 Lancrin, C., Clapes, T., Möröy, T., Robin, C., Miller, C., Cowley, S., Göttgens, B., Kouskoff,  
974 V., & Lacaud, G. (2016). GF11 proteins orchestrate the emergence of haematopoietic  
975 stem cells through recruitment of LSD1. *Nature Cell Biology*, *18*(1), 21–32.  
976 <https://doi.org/10.1038/ncb3276>
- 977 Tika, E., Ousset, M., Dannau, A., & Blanpain, C. (2019). Spatiotemporal regulation of  
978 multipotency during prostate development. *Development*, dev.180224.  
979 <https://doi.org/10.1242/dev.180224>
- 980 Tirosh, I., Izar, B., Prakadan, S. M., Wadsworth, M. H., Treacy, D., Trombetta, J. J., Rotem, A.,  
981 Rodman, C., Lian, C., Murphy, G., Fallahi-Sichani, M., Dutton-Regester, K., Lin, J.-R.,  
982 Cohen, O., Shah, P., Lu, D., Genshaft, A. S., Hughes, T. K., Ziegler, C. G. K., ... Garraway, L.  
983 A. (2016). Dissecting the multicellular ecosystem of metastatic melanoma by single-cell  
984 RNA-seq. *Science*, *352*(6282), 189–196. <https://doi.org/10.1126/science.aad0501>
- 985 Toivanen, R., Mohan, A., & Shen, M. M. (2016). Basal Progenitors Contribute to Repair of the  
986 Prostate Epithelium Following Induced Luminal Anoikis. *Stem Cell Reports*, *0*(0).  
987 <https://doi.org/10.1016/j.stemcr.2016.03.007>
- 988 Toivanen, R., & Shen, M. M. (2017). Prostate organogenesis: Tissue induction, hormonal  
989 regulation and cell type specification. *Development (Cambridge, England)*, *144*(8), 1382–  
990 1398. <https://doi.org/10.1242/dev.148270>
- 991 Tsujimura, A., Koikawa, Y., Salm, S., Takao, T., Coetzee, S., Moscatelli, D., Shapiro, E., Lepor, H.,  
992 Sun, T.-T., & Wilson, E. L. (2002). Proximal location of mouse prostate epithelial stem

- 993 cells. *The Journal of Cell Biology*, 157(7), 1257–1265.
- 994 <https://doi.org/10.1083/jcb.200202067>
- 995 van Bragt, M. P. A., Hu, X., Xie, Y., & Li, Z. (2014). RUNX1, a transcription factor mutated in
- 996 breast cancer, controls the fate of ER-positive mammary luminal cells. *ELife*, 3, e03881.
- 997 <https://doi.org/10.7554/eLife.03881>
- 998 Wang, B., Wang, X., Long, J. E., Eastham-Anderson, J., Firestein, R., & Junttila, M. R. (2015).
- 999 Castration-Resistant Lgr5+ Cells Are Long-Lived Stem Cells Required for Prostatic
- 1000 Regeneration. *Stem Cell Reports*, 4(5), 768–779.
- 1001 <https://doi.org/10.1016/j.stemcr.2015.04.003>
- 1002 Wang, X., Kruithof-de Julio, M., Economides, K. D., Walker, D., Yu, H., Halili, M. V., Hu, Y.-P.,
- 1003 Price, S. M., Abate-Shen, C., & Shen, M. M. (2009). A luminal epithelial stem cell that is a
- 1004 cell of origin for prostate cancer. *Nature*, 461(7263), 495–500.
- 1005 <https://doi.org/10.1038/nature08361>
- 1006 Wang, X.-D., Wang, B.-E., Soriano, R., Zha, J., Zhang, Z., Modrusan, Z., Cunha, G. R., & Gao, W.-
- 1007 Q. (2007). Expression profiling of the mouse prostate after castration and hormone
- 1008 replacement: Implication of H-cadherin in prostate tumorigenesis. *Differentiation;*
- 1009 *Research in Biological Diversity*, 75(3), 219–234. <https://doi.org/10.1111/j.1432->
- 1010 [0436.2006.00135.x](https://doi.org/10.1111/j.1432-0436.2006.00135.x)
- 1011 Wang, Y., Hayward, S., Cao, M., Thayer, K., & Cunha, G. (2001). Cell differentiation lineage in the
- 1012 prostate. *Differentiation; Research in Biological Diversity*, 68(4–5), 270–279.
- 1013 Wolf, F. A., Hamey, F. K., Plass, M., Solana, J., Dahlin, J. S., Göttgens, B., Rajewsky, N., Simon, L.,
- 1014 & Theis, F. J. (2019). PAGA: Graph abstraction reconciles clustering with trajectory

- 1015 inference through a topology preserving map of single cells. *Genome Biology*, 20(1), 59.
- 1016 <https://doi.org/10.1186/s13059-019-1663-x>
- 1017 Xin, L., Lawson, D. A., & Witte, O. N. (2005). The Sca-1 cell surface marker enriches for a
- 1018 prostate-regenerating cell subpopulation that can initiate prostate tumorigenesis.
- 1019 *Proceedings of the National Academy of Sciences of the United States of America*,
- 1020 102(19), 6942–6947. <https://doi.org/10.1073/pnas.0502320102>
- 1021 Yokomizo, T., Yamada-Inagawa, T., Yzaguirre, A. D., Chen, M. J., Speck, N. A., & Dzierzak, E.
- 1022 (2012). Whole-mount three-dimensional imaging of internally localized immunostained
- 1023 cells within mouse embryos. *Nature Protocols*, 7(3), 421–431.
- 1024 <https://doi.org/10.1038/nprot.2011.441>
- 1025 Yoo, Y. A., Roh, M., Naseem, A. F., Lysy, B., Desouki, M. M., Unno, K., & Abdulkadir, S. A. (2016).
- 1026 Bmi1 marks distinct castration-resistant luminal progenitor cells competent for prostate
- 1027 regeneration and tumour initiation. *Nature Communications*, 7, 12943.
- 1028 <https://doi.org/10.1038/ncomms12943>
- 1029 Zhang, D., Zhao, S., Li, X., Kirk, J. S., & Tang, D. G. (2018). Prostate Luminal Progenitor Cells in
- 1030 Development and Cancer. *Trends in Cancer*, 4(11), 769–783.
- 1031 <https://doi.org/10.1016/j.trecan.2018.09.003>
- 1032

1033 **MAIN FIGURE LEGENDS**

1034 **Figure 1. RUNX1 marks a subpopulation of mouse proximal prostate luminal cells (PLCs).**

1035 **(A)** Co-immunostaining of RUNX1, NKX3.1, CDH1 in the mouse Anterior Prostate (AP). Higher  
1036 magnification images of (i) proximal AP and (ii) distal AP are shown. Arrows indicate RUNX1<sup>+</sup>  
1037 NKX3.1<sup>-</sup> cells, arrowheads show RUNX1<sup>-</sup> NKX3.1<sup>+</sup> cells. Scale bars: 500µm (yellow) and 50µm  
1038 (white). **(B)** Quantification of RUNX1 and NKX3.1 nuclear intensity ( $\log_{10}$ ) in CDH1<sup>+</sup> epithelial  
1039 cells by QBIC in proximal and distal AP.  $n = 6-8$  mice. **(C, D)** Flow-cytometry analysis of P2-  
1040 *Runx1*:RFP mice, and corresponding quantification of the percentages of RFP<sup>+</sup> and RFP<sup>-</sup> cells in  
1041 the basal and luminal fractions of the proximal and distal AP.  $n = 7$  mice. **(E)** Experimental  
1042 strategy to grow organoids from sorted RFP<sup>+</sup> and RFP<sup>-</sup> cells from the basal (CD49<sup>high</sup>) and  
1043 luminal (CD24<sup>high</sup>) lineages of P2-*Runx1*:RFP mouse reporters. **(F)** Organoid Forming Capacity  
1044 (OFC) of RFP<sup>+</sup> and RFP<sup>-</sup> basal and luminal sorted cells after 7 days in culture.  $n = 4$  mice. **(G)**  
1045 Whole-mount immunostaining of unipotent K5<sup>+</sup>, unipotent K8<sup>+</sup> or multipotent K5<sup>+</sup> K8<sup>+</sup>  
1046 organoids. Scale bar: 50 µm. **(H)** Quantification of the type of organoids characterized by whole-  
1047 mount immunostaining, as in G. Numbers of organoids quantified are shown above the graph.  $p$   
1048 value is indicated for the proportion of K8<sup>+</sup> organoids between Proximal AP Luminal RFP<sup>+</sup> versus  
1049 RFP<sup>-</sup> derived subset. Other comparisons were not statistically significant.  $n = 2$  mice per group.  
1050 Source files are available in Figure 1—source data 1.

1051

1052 **Figure 2. RUNX1 expressing cells are enriched in the castrated prostate epithelium.**

1053 **(A)** P2-*Runx1*:RFP reporter mice were surgically castrated between 6 to 12 weeks of age and  
1054 analyzed at least 4 weeks post-castration. **(B, C)** Flow-cytometry analysis and corresponding

1055 quantification of the proportion of RFP<sup>+</sup> and RFP<sup>-</sup> cells in the EPCAM<sup>+</sup> fraction of intact and  
1056 castrated prostates of P2-*Runx1*:RFP mice. *n* = 3 mice per group. Int: Intact, Cas: Castrated. **(D)**  
1057 Co-immunostaining of RUNX1, NKX3.1, CDH1 in the castrated wild-type mouse prostate. Higher  
1058 magnification images of (i) proximal, (ii) intermediate and (iii) distal AP are shown. Arrows  
1059 indicate RUNX1<sup>-</sup> NKX3.1<sup>+</sup> cells, arrowheads show a luminal cell co-stained for RUNX1 and  
1060 NKX3.1. Amp: ampullary gland. Scale bars: 500 μm (yellow) and 50 μm (white). Int: Intact, Cas:  
1061 Castrated. **(E)** Co-immunostaining of RUNX1 and TROP2 showing colocalization of the 2 markers  
1062 in both proximal (bottom) and distal (top) castrated AP. Scale bars: 50 μm (white). Source files  
1063 are available in Figure 2—source data 1.

1064

1065 **Figure 3. scRNA-seq profiling of intact and castrated *Runx1*<sup>+</sup> cells reveals transcriptomic**  
1066 **similarity between proximal luminal cells and castration-resistant cells.**

1067 **(A)** Experimental strategy for scRNA-seq on RFP<sup>+</sup> and RFP<sup>-</sup> cells individually dissected lobes of  
1068 intact and castrated prostates isolated from P2-*Runx1*:RFP reporter mice. **(B)** UMAP  
1069 visualization (left) and graph-abstracted representation (PAGA, right) of prostate epithelial cells  
1070 (*n* = 3,825 cells from 3 independent experiments). Colors represent different clusters. In PAGA,  
1071 clusters are linked by weighted edges that represent a statistical measure of connectivity. **(C)**  
1072 Dot plot showing the expression of selected marker genes associated with each cluster. **(D-H)**  
1073 UMAP visualization of prostate epithelial cells. Cells in **D** and **G** are colored by a gradient of log-  
1074 normalized expression levels for each gene indicated. Cell colors in **E** represent the treatment of  
1075 origin (intact, castrated), in **F** individual lobes of origin (AP, DLP, VP), and in **H** RFP FACS gate of  
1076 origin (RFP<sup>+</sup>, RFP<sup>-</sup>).

1077

1078 **Figure 4. Lineage-tracing of *Runx1* expressing cells establishes the intrinsic castration-**  
1079 **resistant properties of the proximal luminal lineage.**

1080 **(A)** Schematic summary of the genetic lineage tracing system employed. **(B)** Experimental  
1081 strategy for lineage-tracing experiments. **(C)** Co-immunostaining of RFP, RUNX1, CDH1 in the  
1082 proximal AP. Arrows indicate RFP labelled RUNX1<sup>+</sup> cells. Scale bar: 50 μm. **(D)** Quantification of  
1083 the percentage of epithelial RFP<sup>+</sup> cells in proximal and distal regions of the prostate in intact (*n*  
1084 = 5), castrated (*n* = 4) and regenerated (*n* = 4) mice. **(E)** Quantification of the percentage of  
1085 epithelial RFP<sup>+</sup> cells in intact (*n* = 5), castrated (*n* = 5) and regenerated (*n* = 4) mice. **(F)** Co-  
1086 immunostaining of RFP, K5, K8 in the proximal AP, distal AP, and DLVP (DLP + VP). Arrowheads  
1087 indicate RFP labelled basal cells (K5<sup>+</sup>) found in distal AP, the white arrow indicates a luminal  
1088 (K8<sup>+</sup>) RFP<sup>+</sup> clone made of 2 cells. Scale bar: 50 μm. **(G)** Quantification of the percentage of  
1089 epithelial RFP<sup>+</sup> clones comprising between 2 to 4 cells in intact (*n* = 5), castrated (*n* = 5) and  
1090 regenerated (*n* = 4) mice. **(H, I)** Quantification of the percentage of RFP<sup>+</sup> cells being K5<sup>+</sup> or K8<sup>+</sup> in  
1091 **H**, or NKX3.1<sup>+</sup> or NKX3.1<sup>-</sup> in **I**, in intact (*n* = 5), castrated (*n* = 5) and regenerated (*n* = 4) mice. Int:  
1092 Intact, Cas: Castrated, Rgn: Regenerated. Source files are available in Figure 4—source data 1.

1093

1094 **Figure 5. RUNX1 marks proximal cells during embryonic prostate development.**

1095 **(A-C)** Co-immunostainings of the mouse urogenital sinus at E18.5 for RUNX1, K5, K8 in **A**,  
1096 RUNX1, p63, CDH1 in **B**, RUNX1, NKX3.1, CDH1 in **C**. Scale bar: 50 μm. **(D)** Co-immunostainings  
1097 of RUNX1, NKX3.1, CDH1 at postnatal (P) day 14. Higher magnification images of (p) proximal,  
1098 (i) intermediate, and (d) distal regions are shown. Scale bars: 200 μm (yellow) and 50 μm

1099 (white). Amp: ampullary gland; Sv: seminal vesicles; Ur: urethra; p: proximal; i: intermediate; d:  
1100 distal. **(E)** Scheme of the protocol to culture *ex vivo* explants of mouse UGS harvested at E15.5.  
1101 **(F)** Representative images of UGS explants at E15.5 (day 0), day 3, day 5 and day 7 of culture  
1102 showing the formation of premature prostate buds. **(G)** Co-immunostaining of RUNX1, NKX3.1,  
1103 CDH1 in UGS explants harvested at day 0, day 1, day 2 and day 7. Higher magnification images  
1104 of each square (left) are shown for each time point. Chevron arrows show RUNX1<sup>+</sup> NKX3.1<sup>+</sup>  
1105 cells, closed arrows indicate RUNX1<sup>-</sup> NKX3.1<sup>+</sup> cells, arrowheads show RUNX1<sup>+</sup> NKX3.1<sup>-</sup> cells.  
1106 Scale bars: 200  $\mu$ m (yellow) and 50  $\mu$ m (white). **(H)** Quantification of RUNX1 and NKX3.1 nuclear  
1107 intensity ( $\log_{10}$ ) in CDH1<sup>+</sup> epithelial cells of UGS explants by QBIC. Quantification was performed  
1108 within the boundaries delimited in **G** by dotted lines, at day 0 ( $n = 3$  explants), day 1 ( $n = 7$   
1109 explants), day 2 ( $n = 6$  explants) and day 7 ( $n = 6$  explants). Source files are available in Figure  
1110 5—source data 1.

1111

1112 **Figure 6. scRNA-seq of UGS explant cultures shows specification of the proximal luminal**  
1113 **lineage during embryonic prostate development.**

1114 **(A)** Experimental strategy for scRNA-seq of UGS explant cultures at day 0, day 1, day 3 and day  
1115 6. **(B, C)** Force directed visualization of the developing prostatic epithelium in UGS explant  
1116 cultures. In **B** cells are colored by experimental time points, and in **C** cells are colored by  
1117 clusters. **(D)** PAGA representation of the clusters as in **C**. Weighted edges between cluster  
1118 nodes represent a statistical measure of connectivity. **(E)** Fraction of cells per cluster at each  
1119 experimental time point, displaying a progressive cellular diversification. **(F-H)** PAGA  
1120 representations with cluster nodes colored by a gradient representing the mean log-normalized



1121 expression levels of each gene. **(I)** Force directed visualization of the developing prostatic  
1122 epithelium in UGS explant cultures. Color gradient represents AUC scores per cell. Per-cell AUC  
1123 scores were calculated using the 'AUCCell' package. Gene signatures for 'Lum-D' (left) and 'Basal'  
1124 (right) were generated using the list of differentially upregulated genes previously obtained  
1125 from our adult mouse prostate clusters.

1126

1127 **Figure 7. RUNX1<sup>+</sup> cells contribute to the establishment of the proximal luminal lineage during**  
1128 **embryonic prostate development.**

1129 **(A)** Strategy for lineage-tracing of RUNX1<sup>+</sup> cells in UGS explant cultures. Tamoxifen was applied  
1130 on day 0 and day 1 and washed out on day 2. **(B, C)** Co-immunostaining of RFP, RUNX1, CDH1 in  
1131 UGS explants harvested at day 2 **(B)** and day 7 **(C)**. Higher magnification images of proximal (i)  
1132 and (ii) distal regions are shown for day 7. Arrows show RFP<sup>+</sup> RUNX1-low cells, arrowheads  
1133 show RFP<sup>+</sup> RUNX1<sup>+</sup> cells. Scale bars: 200 μm (yellow) and 50 μm (white). **(C)** Quantification of  
1134 the percentage of epithelial RUNX1<sup>+</sup> cells in the RFP subset at day 2 ( $n = 7$ ) and day 7 ( $n = 3$ ) of  
1135 UGS explant cultures. Quantification was performed within the boundaries delimited in **B** by  
1136 dotted lines. **(E, F)** Co-immunostaining of RFP, NKX3.1, CDH1 in UGS explants harvested at day 2  
1137 **(E)** and day 7 **(F)**. Higher magnification images of (i) proximal and (ii) distal regions are shown  
1138 for day 7. Arrows show RFP<sup>+</sup> NKX3.1<sup>+</sup> cells, arrowheads show RFP<sup>+</sup> NKX3.1<sup>-</sup> cells. Scale bars: 200  
1139 μm (yellow) and 50 μm (white). **(G)** Quantification of the percentage of epithelial NKX3.1<sup>+</sup> cells  
1140 in the RFP subset at day 2 ( $n = 6$ ) and day 7 ( $n = 4$ ) of UGS explant cultures. Quantification was  
1141 performed within the boundaries delimited in **F** by dotted lines. **(H, I)** Co-immunostaining of  
1142 RFP, K4, CDH1 in UGS explants harvested at day 2 **(H)** and day 7 **(I)**. Higher magnification images

1143 of (i) proximal and (ii) distal regions are shown for day 7. Arrows show RFP<sup>+</sup> K4 cells,  
1144 arrowheads show RFP<sup>+</sup> K4<sup>+</sup> cells. Scale bars: 200  $\mu$ m (yellow) and 50  $\mu$ m (white). (J)  
1145 Quantification of the percentage of epithelial K4<sup>+</sup> cells in the RFP subset at day 2 ( $n = 3$ ) and day  
1146 7 ( $n = 3$ ) of UGS explant cultures. Quantification was performed within the boundaries  
1147 delimited in I by dotted lines. Source files are available in Figure 7—source data 1.

1148

1149 **Figure 1—figure supplement 1. RUNX1 is enriched in the mouse prostate epithelium.**

1150 (A) Co-immunostaining of RUNX1, NKX3.1, CDH1 in the mouse DLP (top) and VP (bottom).  
1151 Closed arrows indicate RUNX1<sup>+</sup> NKX3.1<sup>-</sup> cells, chevron arrows indicate rare RUNX1<sup>+</sup> NKX3.1<sup>+</sup>  
1152 cells, arrowheads show RUNX1<sup>-</sup> NKX3.1<sup>+</sup> cells. Scale bars: 50  $\mu$ m. (B) Quantification of RUNX1  
1153 and NKX3.1 nuclear intensity ( $\log_{10}$ ) in CDH1<sup>+</sup> epithelial cells by QBIC in proximal DLP ( $n = 3$ ),  
1154 distal DLP ( $n = 8$ ), proximal VP ( $n = 3$ ) and distal VP ( $n = 8$ ). (C) H&E staining of the mouse AP.  
1155 Higher magnification images of (i) proximal AP and (ii) distal regions are shown. Arrows show  
1156 typical proximal luminal cells with condensed nuclei and cytoplasm, arrowheads show typical  
1157 distal secretory luminal cells with enlarged cytoplasm and strong pink eosinophilic staining.  
1158 Scale bars: 200  $\mu$ m (blue) and 50  $\mu$ m (black). Source files are available in Figure 1—figure  
1159 supplement 1—source data 1.

1160

1161 **Figure 1—figure supplement 2. Runx1 expression is mediated by the P2 promoter in the**  
1162 **mouse prostate epithelium.**

1163 (A) Schematic diagrams of the P2-*Runx1*:RFP reporter allele (top), *Runx1* WT allele (middle), and  
1164 P1-*Runx1*:GFP reporter allele (bottom). In P2-*Runx1*:RFP or P1-*Runx1*:GFP mice, expression of

1165 RFP or GFP is directed by *Runx1* proximal P2 or distal P1 promoter respectively. WT *Runx1*  
1166 expression is directed by the remaining WT allele. **(B)** Flow-cytometry analysis of the epithelial  
1167 EPCAM<sup>+</sup> fraction of WT, P2-*Runx1*:RFP and P1-*Runx1*:GFP mice. Percentages are indicated in  
1168 each quadrant gates. **(C)** Confocal images indicating P2-*Runx1*:RFP signal in the glandular  
1169 epithelium (top), while P1-*Runx1*:GFP (bottom) activity is detected in the surrounding stroma.  
1170 Scale bar: 50 μm. **(D)** Flow-cytometry analysis of P2-*Runx1*:RFP mice, and corresponding  
1171 quantification of the percentages of RFP<sup>+</sup> and RFP<sup>-</sup> cells in the basal and luminal fractions of DLP  
1172 (*n* = 4 mice) and VP (*n* = 4 mice) lobes. Source files are available in Figure 1—figure supplement  
1173 2—source data 1.

1174

1175 **Figure 1—figure supplement 3. Characterization of P2Runx1:RFP derived mouse prostate**  
1176 **organoids.**

1177 **(A)** Organoid Forming Capacity (OFC) of RFP<sup>+</sup> and RFP<sup>-</sup> basal and luminal sorted cells from DLP  
1178 (left) and VP (right) cultured for 7 days. *n* = 4 mice. **(B)** Quantification of organoid morphologies  
1179 determined by brightfield assessment. *p* values are indicated only for statistically significant (*p* <  
1180 0.05) comparisons between RFP<sup>+</sup> versus RFP<sup>-</sup> derived subsets. *n* = 4 mice. **(C)** Quantification of  
1181 the type of organoids (pink: unipotent K5<sup>+</sup>, green: unipotent K8<sup>+</sup>, orange: multipotent K5<sup>+</sup> K8<sup>+</sup>  
1182 organoids) characterized by whole-mount immunostaining. *p* value is indicated for the  
1183 proportion of K5<sup>+</sup>K8<sup>+</sup> organoids between VP Luminal RFP<sup>+</sup> versus RFP<sup>-</sup> derived subset. Other  
1184 comparisons were not statistically significant. *n* = 2 mice. **(D)** Quantification of organoid  
1185 morphologies according to the type of organoids (unipotent K5<sup>+</sup>, unipotent K8<sup>+</sup>, multipotent K5<sup>+</sup>  
1186 K8<sup>+</sup>). Results are shown for luminal proximal and distal AP derived organoids. *n* = 2 mice.

1187 Numbers of organoids quantified are shown above the graph. Two-way ANOVA using Tukey's  
1188 multiple comparisons test was used for statistical analysis. (E) Quantification of the organoid  
1189 area estimated from maximum projection of stacked images from basal (left) and luminal (right)  
1190 fractions of the proximal AP. Numbers of organoids quantified are shown above the graph.  
1191 Two-tailed Mann-Whitney test was used for statistical analysis.  $n = 2$  mice. Source files are  
1192 available in Figure 1—figure supplement 3—source data 1.

1193

1194 **Figure 2—figure supplement 1. Characterization of RUNX1 expression in the castrated mouse**  
1195 **prostate.**

1196 (A) Flow cytometry analysis and corresponding quantifications of the basal and luminal EPCAM<sup>+</sup>  
1197 fraction from AP, DLP and VP lobes of castrated P2-*Runx1*:RFP mice ( $n = 3$ ). (B, C) Co-  
1198 immunostaining of RUNX1, NKX3.1, CDH1 in castrated DLP (B) and VP (C) lobes. Scale bars: 50  
1199  $\mu\text{m}$  (white). Source files are available in Figure 2—figure supplement 2—source data 1.

1200

1201 **Figure 3—figure supplement 1. Pre-processing of the scRNA-seq dataset of adult intact and**  
1202 **castrated mouse prostates.**

1203 (A) UMAP visualization in MULTI-seq barcodes space for each independent experiment (Run 1:  
1204 left, Run 2: middle, Run 3: right) before (top) and after (bottom) quality control and barcode  
1205 filtration (see Methods for details). (B) UMAP visualization of the integrated batch-corrected  
1206 dataset ( $n = 4,499$  cells from 3 independent experiments). Colors represent different clusters.  
1207 (C) UMAP visualization of the integrated batch-corrected dataset split and colored by individual  
1208 experiment (Run 1: left, Run 2: middle, Run 3: right). (D, E) Example key marker genes used for

1209 cell type characterization. **(D)** UMAP visualization of the integrated batch-corrected dataset.

1210 Cells are colored by a gradient of log-normalized expression levels for each gene indicated. **(E)**

1211 Dot plot showing the expression of selected marker genes associated with each cluster. Cells

1212 corresponding to the prostatic clusters were kept for downstream analyses.

1213

1214 **Figure 3—figure supplement 2. Characterization of the scRNA-seq prostate epithelial subset.**

1215 **(A-D)** Number of cells present in the prostate epithelial subset. In **A** colors correspond to

1216 phenotypic sorted populations, in **B** treatment of origin, in **C** RFP FACS gate of origin, in **D**

1217 individual lobes. **(E, G)** UMAP visualization of prostate epithelial cells. Cells in **E** are colored by

1218 clusters. Clusters 0, 1 and 5 were merged together. In **F** and **G** colors represent phenotypic

1219 sorted populations. **(H-J)** Cells are colored by a gradient of log-normalized expression levels for

1220 each gene. Canonical epithelial markers are shown in **H**, luminal lineage markers in **I**, and basal

1221 lineage markers in **J**.

1222

1223 **Figure 3—figure supplement 3. Characterization of the scRNA-seq prostate epithelial dataset.**

1224 **(A)** Heatmap of the 10 most differentially upregulated genes per cluster. **(B, C)** Sankey diagrams

1225 summarizing the proportion of cells and between phenotypic groups. **(D, E)** Cells are colored by

1226 a gradient of log-normalized expression levels for each gene. **(D)** shows the expression of Ly6

1227 family members, and in **E** RUNX family members are shown.

1228

1229 **Figure 3—figure supplement 4. Gene Ontology and differential expression analysis within the**

1230 **scRNA-seq prostate epithelial dataset.**

1231 Bar plots of the 8 most significantly (g:Profiler adjusted p-value < 0.05) enriched gene ontology  
1232 (GO) terms (GO:BP, Biological Processes) using the list of differentially upregulated genes  
1233 specific to (A) Lum-A, (B) Lum-B, (C) Lum-C, (D) Lum-D, (E) Lum-E, (F) Lum-F, and (G) Basal  
1234 clusters. (H, I) 15 most enriched GO terms (g:Profiler adjusted p-value < 0.05) for genes  
1235 upregulated in the Lum-D cluster against combined Lum-A, Lum-B and Lum-C clusters in H.  
1236 Results of the opposite comparison are shown in I. (J) Violin plots showing the expression levels  
1237 of specific genes within the Lum-D cluster. Data are split and colored by treatment for each  
1238 lobe. The expression of *Krt4*, *Tacstd2/Trop2* and *Runx1* does not vary upon treatment, while  
1239 Androgen Receptor (AR) regulated genes such as *PscA* and *Tspan1* are downregulated after  
1240 castration.

1241

1242 **Figure 4—figure supplement 1. Lineage tracing of RUNX1 expressing cells labelled in intact**  
1243 **mice.**

1244 (A) Scheme of the tamoxifen labelling strategy to evaluate the labelling efficiency of *Runx1*  
1245 expressing cells. (B) Flow-cytometry analysis of intact ( $n = 2$ ), castrated ( $n = 2$ ), and regenerated  
1246 ( $n = 2$ ) *Runx1<sup>CreER</sup> Rosa26<sup>LSL-RFP</sup>* mice, and corresponding quantification of the percentage of RFP<sup>+</sup>  
1247 cells in the epithelial EPCAM<sup>+</sup> fraction. (C) Estimated absolute number of epithelial RFP<sup>+</sup> cells in  
1248 intact ( $n = 5$ ) and castrated ( $n = 5$ ) and regenerated ( $n = 4$ ) prostates based on IHC  
1249 quantifications. Int: Intact, Cas: Castrated, Rgn: Regenerated. (D) Quantification of the  
1250 percentage of epithelial RFP<sup>+</sup> cells being K4<sup>+</sup> or K4 in intact ( $n = 3$ ), castrated ( $n = 4$ ) and  
1251 regenerated ( $n = 5$ ) mice. (E) Co-immunostaining showing the enrichment of K4<sup>+</sup> RFP labelled

1252 cells in the proximal region of the AP (top) and DLVP (bottom) prostate lobes. Scale bar: 50  $\mu$ m.

1253 Source files are available in Figure 4—figure supplement 1—source data 1.

1254

1255 **Figure 5—figure supplement 1. Characterization of RUNX1 expression during prostate**  
1256 **development *in vivo*.**

1257 **(A)** Co-immunostainings of the mouse urogenital sinus at E18.5 for RUNX1, NKX3.1, K4. p:

1258 proximal, d: distal. Scale bar: 50  $\mu$ m. Dotted lines indicate the urogenital epithelium. **(B)** Co-

1259 immunostainings of the mouse urogenital sinus at E18.5 for RUNX1, NKX3.1, LY6D. p: proximal,

1260 d: distal. Scale bar: 50  $\mu$ m. **(C)** Co-immunostaining of RUNX1, NKX3.1, K4 at postnatal (P) day 14.

1261 Higher magnification images of (p) proximal, (i) intermediate, and (d) distal regions are shown.

1262 Scale bars: 200  $\mu$ m (yellow) and 50  $\mu$ m (white). **(D, E)** Co-immunostainings at P14 for RUNX1,

1263 K5, K8 in **B** RUNX1, p63, CDH1 in **C**. p: proximal, i: intermediate, d: distal. Scale bar: 50  $\mu$ m.

1264

1265 **Figure 5—figure supplement 2. Characterization of RUNX1 expression during prostate**  
1266 **development in UGS explant cultures.**

1267 **(A)** Co-immunostaining of RUNX1, K5, K8 in UGS explants harvested at day 2 and day 7. p:

1268 proximal, d: distal. Scale bar: 50  $\mu$ m. **(E)** Quantification of the percentage of K5<sup>+</sup>, K8<sup>+</sup>, K5<sup>+</sup> K8<sup>+</sup>

1269 cells during UGS explant cultures at day 0 ( $n = 2$  explants), day 1 ( $n = 3$  explants), day 2 ( $n = 3$

1270 explants), day 7 ( $n = 4$  explants), showing a progressive reduction in the proportion of K5<sup>+</sup> K8<sup>+</sup>

1271 double positive cells. **(C)** Co-immunostaining of RUNX1, NKX3.1, LY6D in UGS explants harvested

1272 at day 7. p: proximal, d: distal. Scale bar: 50  $\mu$ m. **(D)** Co-immunostaining of RUNX1, NKX3.1, K4

1273 in UGS explants harvested at day 1 (top), 3 (middle) and 7 (bottom). Higher magnification

1274 images of (p) proximal, (i) intermediate, and (d) distal regions are shown for day 7. Scale bars:  
1275 200  $\mu\text{m}$  (yellow) and 50  $\mu\text{m}$  (white). Dotted lines indicate the urogenital epithelium. (E) Co-  
1276 immunostaining of RUNX1, Ki67, CDH1 in UGS explants harvested at day 2 and day 7. p:  
1277 proximal, d: distal. Scale bar: 50  $\mu\text{m}$ . Source files are available in Figure 5—figure supplement  
1278 2—source data 1.

1279

1280 **Figure 6—figure supplement 1. Pre-processing of the scRNA-seq dataset of UGS explant**  
1281 **cultures.**

1282 (A) UMAP visualization in MULTI-seq barcodes space before (top) and after (bottom) quality  
1283 control and barcode filtration (see Methods for details). (B) UMAP visualization of the dataset  
1284 colored by estimated cell cycle phase (top). Due to the strong underlying impact on clustering,  
1285 the cell cycle effect was regressed out (bottom). (C, D) UMAP visualization of the dataset  
1286 colored in C by experimental time point and in D by labeled populations. (E) Dot plot showing  
1287 the expression of selected marker genes associated with each labelled population. (F) Bar plots  
1288 of the 10 most significantly (g:Profiler adjusted p-value < 0.05) enriched gene ontology (GO)  
1289 terms (GO:BP, Biological Processes) on the differentially upregulated genes specific to the  
1290 ‘Hypoxic/Stressed’ cluster. (G-I) UMAP visualization of the prostatic subset (from D), labelled by  
1291 time points in G, clusters in H, estimated cell cycle phase in I. (J) Percentage of cells in the  
1292 different estimated cell cycle phases in each clusters. (K) Diffusion maps representation of the  
1293 prostatic subset using the first 2 diffusion components with (top) and without C9 (bottom). C9  
1294 was excluded for downstream analyses due to its outlying profile.

1295



1296 **Figure 6—figure supplement 2. Characterization of the developing prostatic epithelium in the**  
1297 **scRNA-seq dataset of UGS explant culture.**

1298 **(A)** Heatmap of the 10 most differentially upregulated genes per cluster. **(B-E)** PAGA  
1299 representations with cluster nodes colored by a gradient representing the mean log-normalized  
1300 expression levels of each genes indicated. **(B)** shows the expression of common prostate  
1301 lineage markers, **(C)** shows known regulators of prostate development, **(D)** shows basal  
1302 markers, **(E)** shows proliferation markers. **(F)** Box plots of per-cell AUC signature scores  
1303 calculated using the ‘AUCcell’ package for individual UGS explant clusters. Gene signatures were  
1304 generated using the list of differentially upregulated genes previously obtained from our adult  
1305 mouse prostate clusters. **(G)** Force directed visualization of the developing prostatic epithelium  
1306 in UGS explant cultures. Color gradient represents AUC scores per cell.

1307

1308 **Figure 7—figure supplement 1. Lineage-tracing of RUNX1 expressing cells in UGS explants.**

1309 **(A, B)** Co-immunostaining of RFP, p63, CDH1 in UGS explants harvested at day 2 **(A)** and day 7  
1310 **(B)**. Higher magnification images of (i) proximal and (ii) distal regions are shown for day 7.  
1311 Arrows show RFP<sup>+</sup> p63<sup>+</sup> cells, arrowheads show RFP<sup>+</sup> p63<sup>-</sup> cells. Scale bars: 200  $\mu$ m (yellow) and  
1312 50  $\mu$ m (white). **(C)** Quantification of the percentage of epithelial RFP<sup>+</sup> p63<sup>+</sup> cells at day 2 ( $n = 7$ )  
1313 and day 7 ( $n = 4$ ) of UGS explant cultures. Quantification was performed within the boundaries  
1314 delimited in **B** by dotted lines. **(D)** Co-immunostaining of RFP, K5, K8 in UGS explants harvested  
1315 at day 2 (top) and day 7 (bottom). Higher magnification images of proximal (i) and (ii) distal  
1316 regions are shown for day 7. Arrows show RFP<sup>+</sup> K5<sup>+</sup> K8<sup>+</sup> cells, chevron arrows show RFP<sup>+</sup> K5<sup>-</sup> K8<sup>+</sup>,  
1317 arrowheads show RFP<sup>+</sup> K5<sup>+</sup> K8<sup>-</sup> cells. Scale bars: 200  $\mu$ m (yellow) and 50  $\mu$ m (white).

1318 (E) Quantification of the percentage of epithelial K5<sup>+</sup> K8<sup>+</sup>, K5<sup>-</sup> K8<sup>+</sup> cells and K5<sup>+</sup> K8<sup>-</sup> cells in the  
1319 RFP subset at day 2 ( $n = 4$ ) and day 7 ( $n = 3$ ) of UGS explant cultures. Quantifications were  
1320 performed within the boundaries delimited in **D** by dotted lines. (**F, G**) Co-immunostaining of  
1321 RFP, *Nupr1* (mRNA), CDH1 in UGS explants harvested at day 2 (**F**) and day 7 (**G**). Higher  
1322 magnification images of (i) proximal and (ii) distal regions are shown for day 7. Arrows show  
1323 RFP<sup>+</sup> *Nupr1*<sup>+</sup> cells, arrowheads show RFP<sup>+</sup> *Nupr1*<sup>-</sup> cells. Scale bars: 200  $\mu\text{m}$  (yellow) and 50  $\mu\text{m}$   
1324 (white). (**J**) Quantification of the percentage of epithelial K4<sup>+</sup> cells in the RFP subset at day 2 ( $n =$   
1325 3) and day 7 ( $n = 4$ ) of UGS explant cultures. Quantification was performed within the  
1326 boundaries delimited in **G** by dotted lines. Source files are available in Figure 7—figure  
1327 supplement 1—source data 1.

1328 **FIGURE SUPPLEMENTS**

1329 **Figure 1—figure supplement 1. RUNX1 is enriched in the mouse prostate epithelium.**

1330 **Figure 1—figure supplement 2. *Runx1* expression is mediated by the P2 promoter in the**  
1331 **mouse prostate epithelium.**

1332 **Figure 1—figure supplement 3. Characterization of P2-*Runx1*:RFP derived mouse prostate**  
1333 **organoids.**

1334 **Figure 2—figure supplement 1. Characterization of RUNX1 expression in the castrated mouse**  
1335 **prostate.**

1336 **Figure 3—figure supplement 1. Pre-processing of the scRNA-seq dataset of adult intact and**  
1337 **castrated mouse prostates.**

1338 **Figure 3—figure supplement 2. Characterization of the scRNA-seq prostate epithelial subset.**

1339 **Figure 3—figure supplement 3. Characterization of the scRNA-seq prostate epithelial dataset.**

1340 **Figure 3—figure supplement 4. Gene Ontology and differential expression analysis within the**  
1341 **scRNA-seq prostate epithelial dataset.**

1342 **Figure 4—figure supplement 1. Lineage tracing of RUNX1 expressing cells labelled in intact**  
1343 **mice.**

1344 **Figure 5—figure supplement 1. Characterization of RUNX1 expression during prostate**  
1345 **development *in vivo*.**

1346 **Figure 5—figure supplement 2. Characterization of RUNX1 expression during prostate**  
1347 **development in UGS explant cultures.**

1348 **Figure 6—figure supplement 1. Pre-processing of the scRNA-seq dataset of UGS explant**  
1349 **cultures.**

- 1350 **Figure 6—figure supplement 2. Characterization of the developing prostatic epithelium in the**  
1351 **scRNA-seq dataset of UGS explant culture.**
- 1352 **Figure 7—figure supplement 1. Lineage-tracing of RUNX1 expressing cells in UGS explants.**

1353 **SUPPLEMENTARY FILES**

1354 **Supplementary file 1. Quality control metrics and metadata of scRNAseq experiments**

1355 **Supplementary file 2. Genes differentially expressed between adult clusters**

1356 **Supplementary file 3. Genes differentially expressed in intact versus castrated Lum-D cells**

1357 **Supplementary file 4. Genes differentially expressed between UGS explants clusters**

1358 **Supplementary file 5. Gene lists used for the analysis of gene set activity**

1359

1360 **SOURCE DATA FILES**

1361 **Figure 1. source data 1.xlsx**

1362 **Figure 1. figure supplement 1. source data1 .xlsx**

1363 **Figure 1. figure supplement 2. source data1 .xlsx**

1364 **Figure 1. figure supplement 3. source data 1.xlsx**

1365 **Figure 2. figure supplement 1. source data 1.xlsx**

1366 **Figure 2. source data 1.xlsx**

1367 **Figure 4. source data 1.xlsx**

1368 **Figure 4. figure supplement 1. source data 1.xlsx**

1369 **Figure 5. figure supplement 2. source data 1.xlsx**

1370 **Figure 5. source data 1.xlsx**

1371 **Figure 7 - figure supplement 1. source data 1.xlsx**

1372 **Figure 7 - source data 1.xlsx**

**A**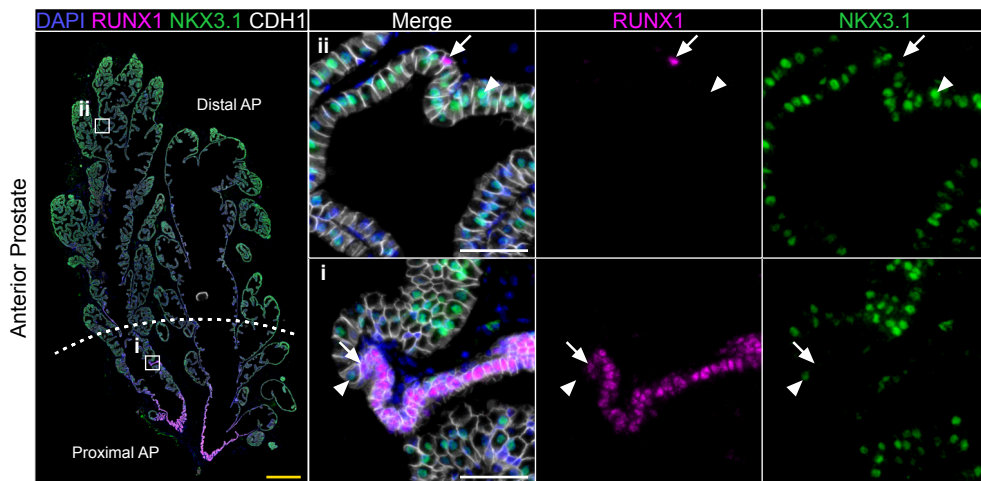**B**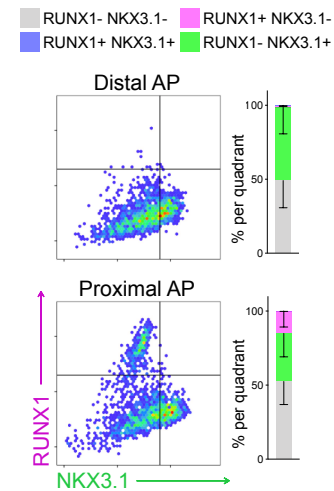**C**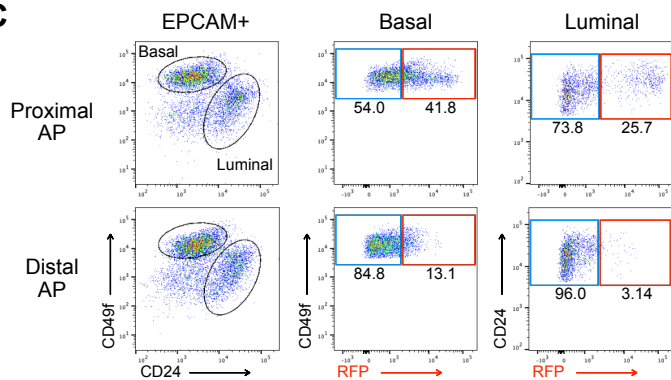**D**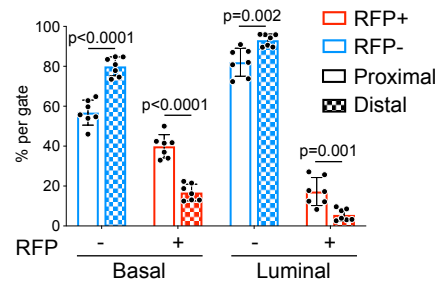**E**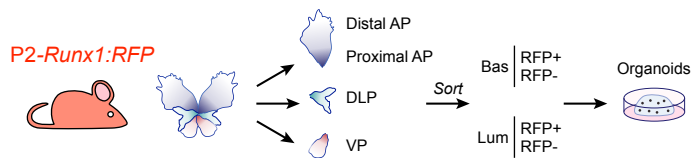**F**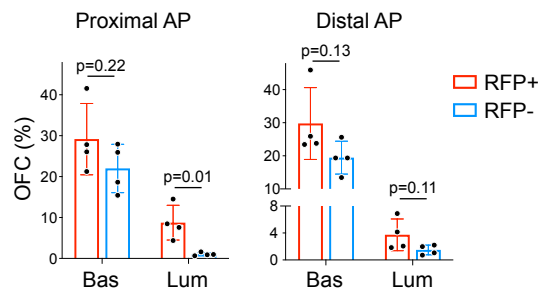**G**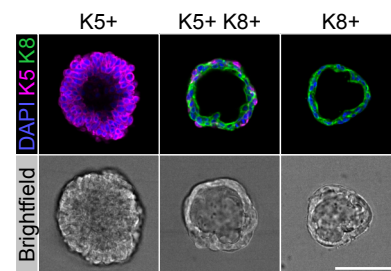**H**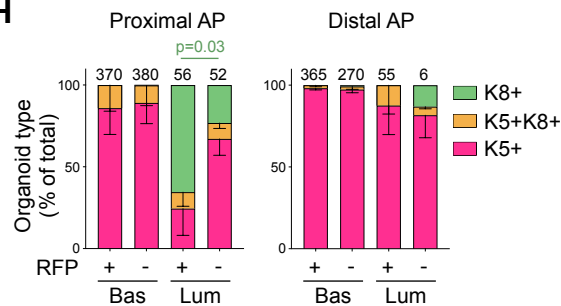

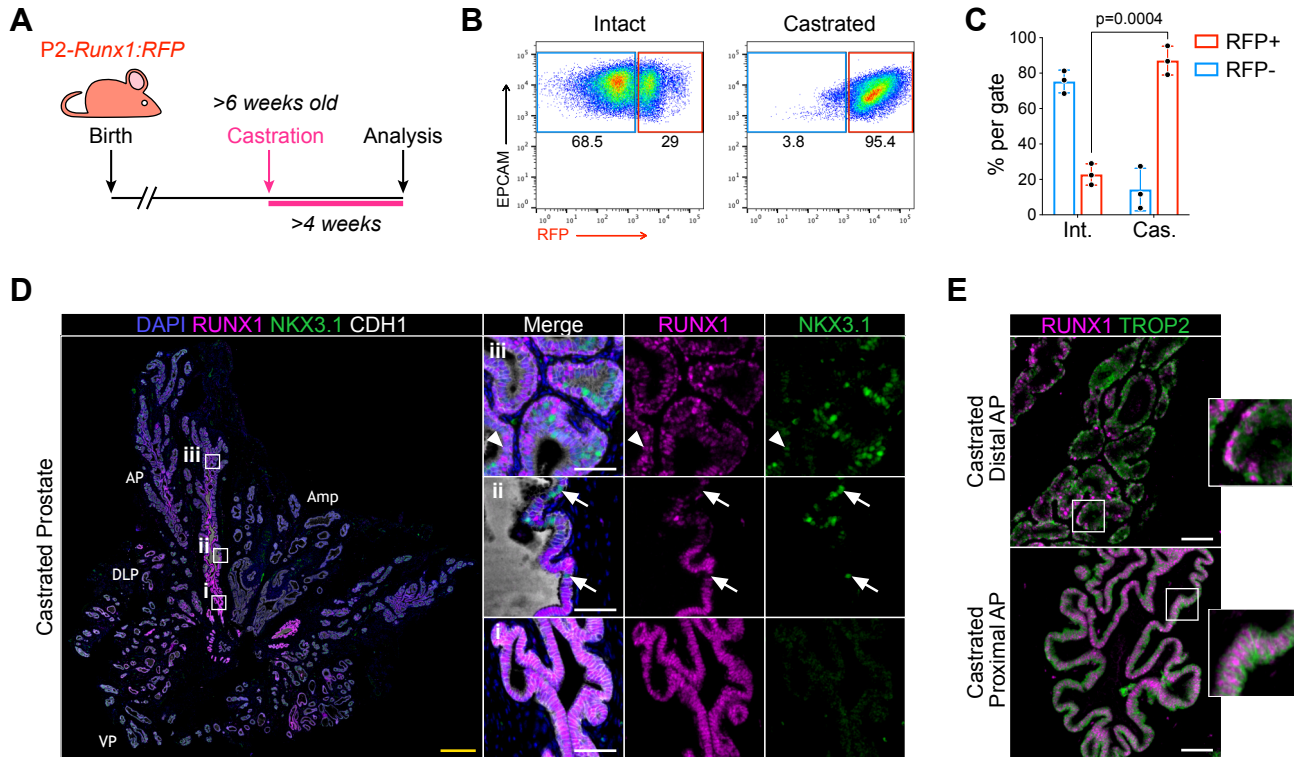

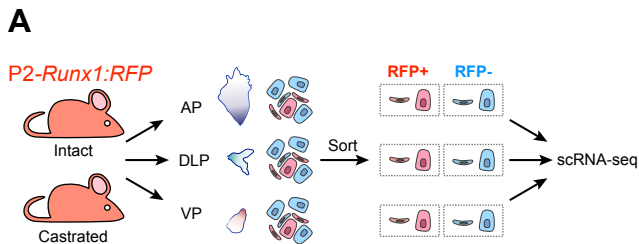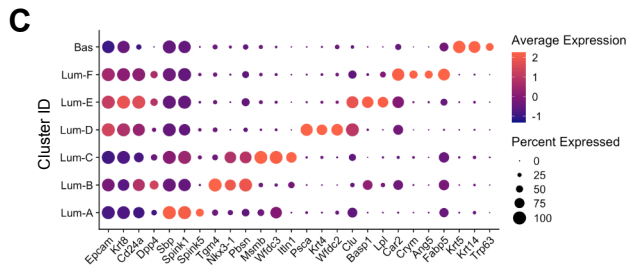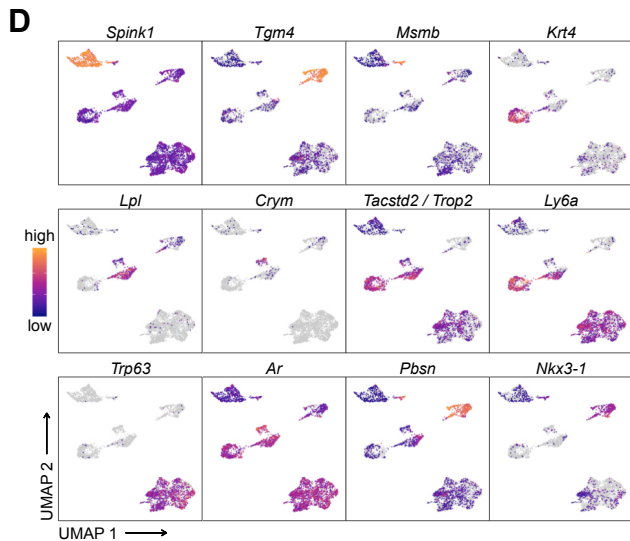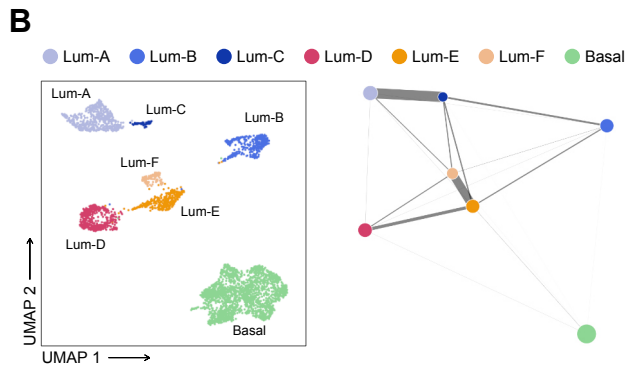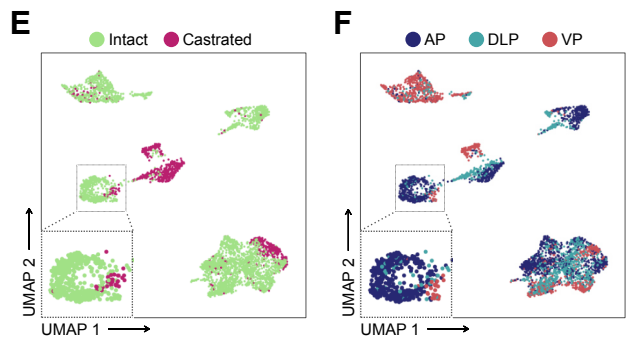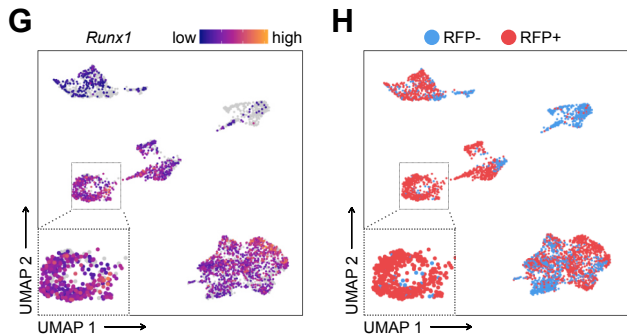



**A**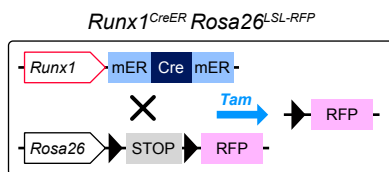**B**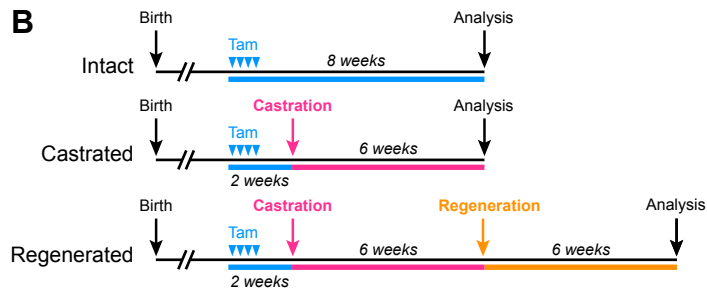**C**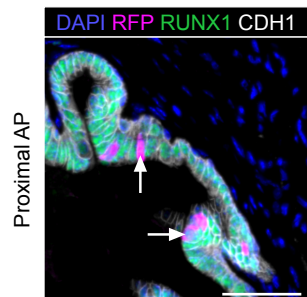**D**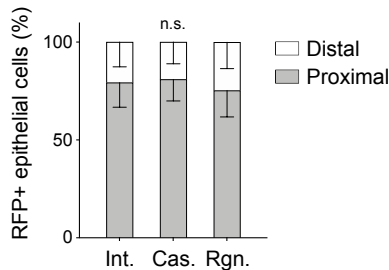**E**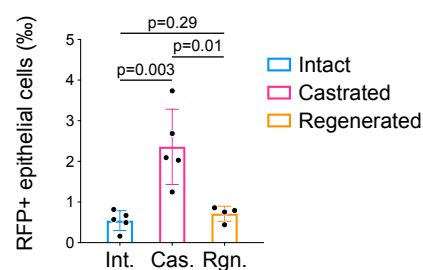**F**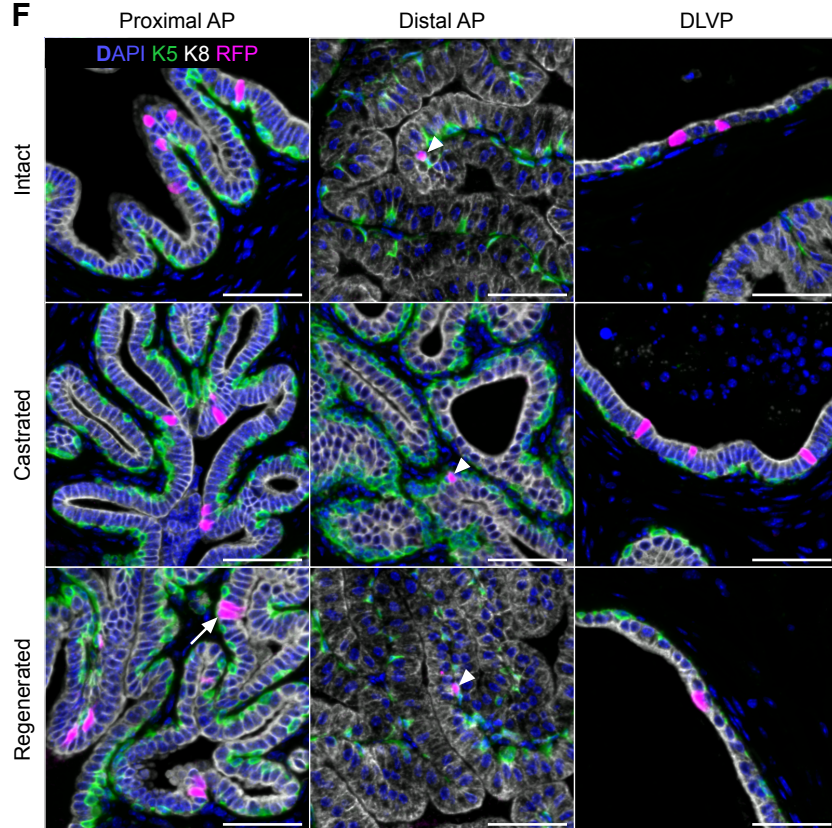**G**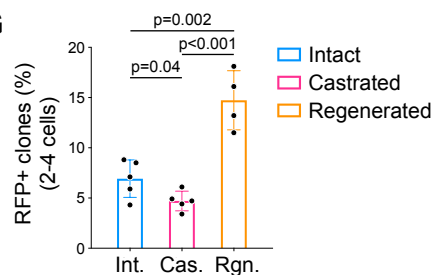**H**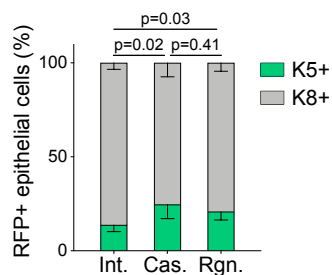**I**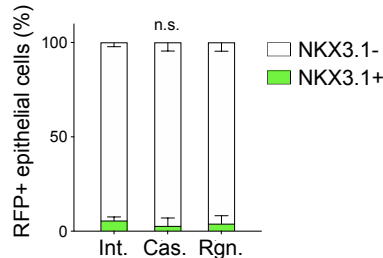

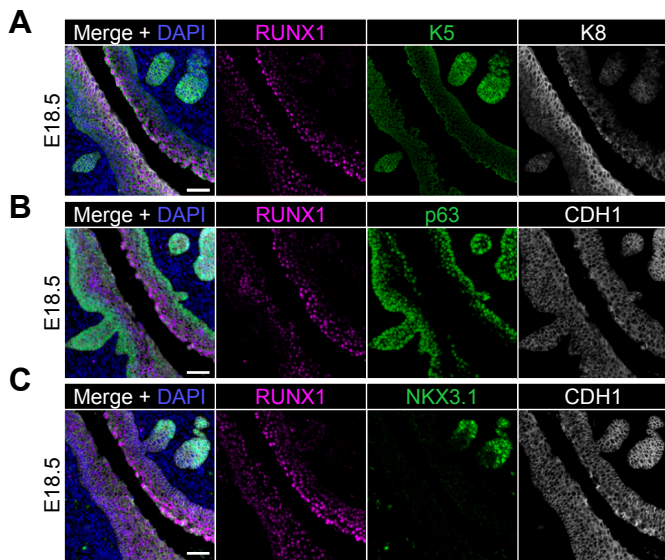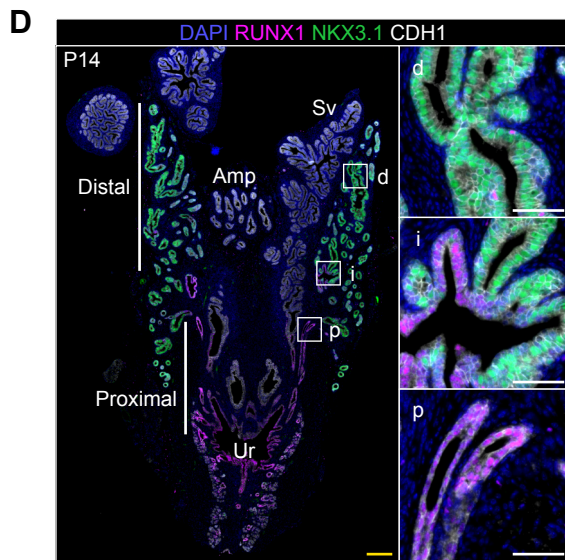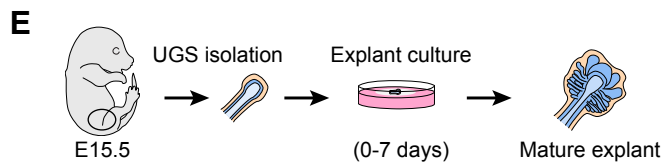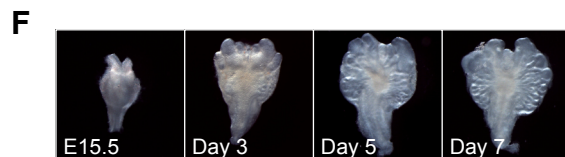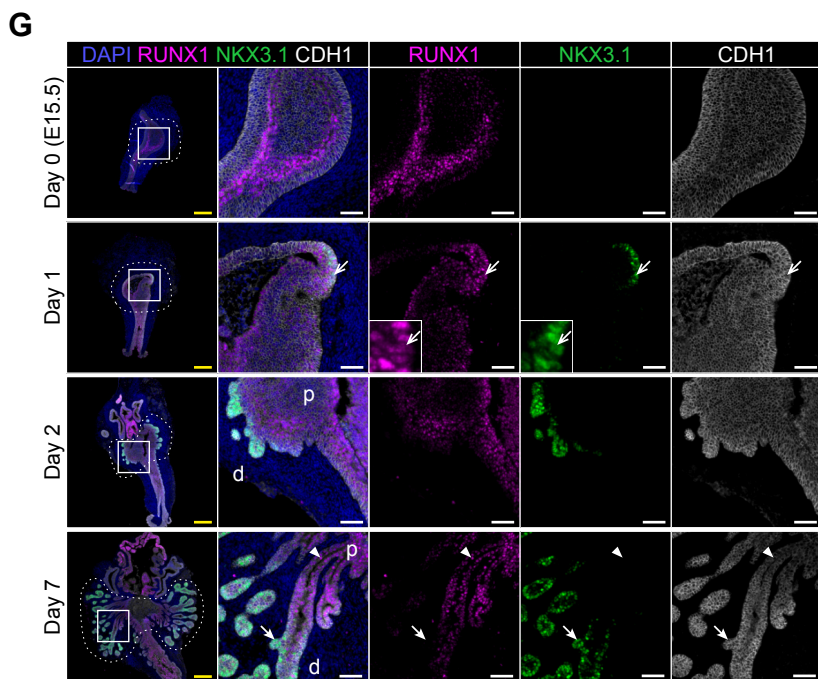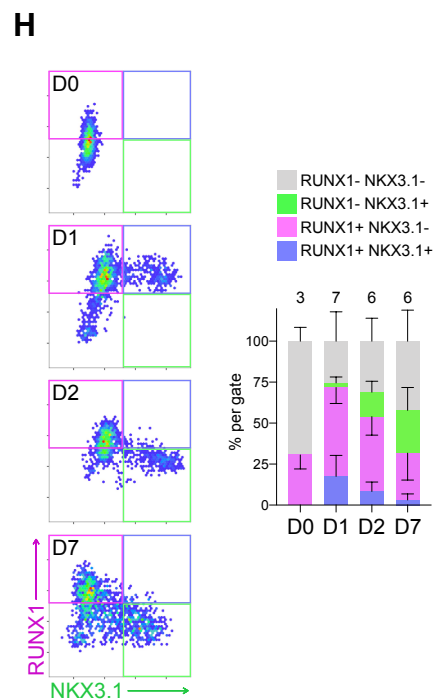

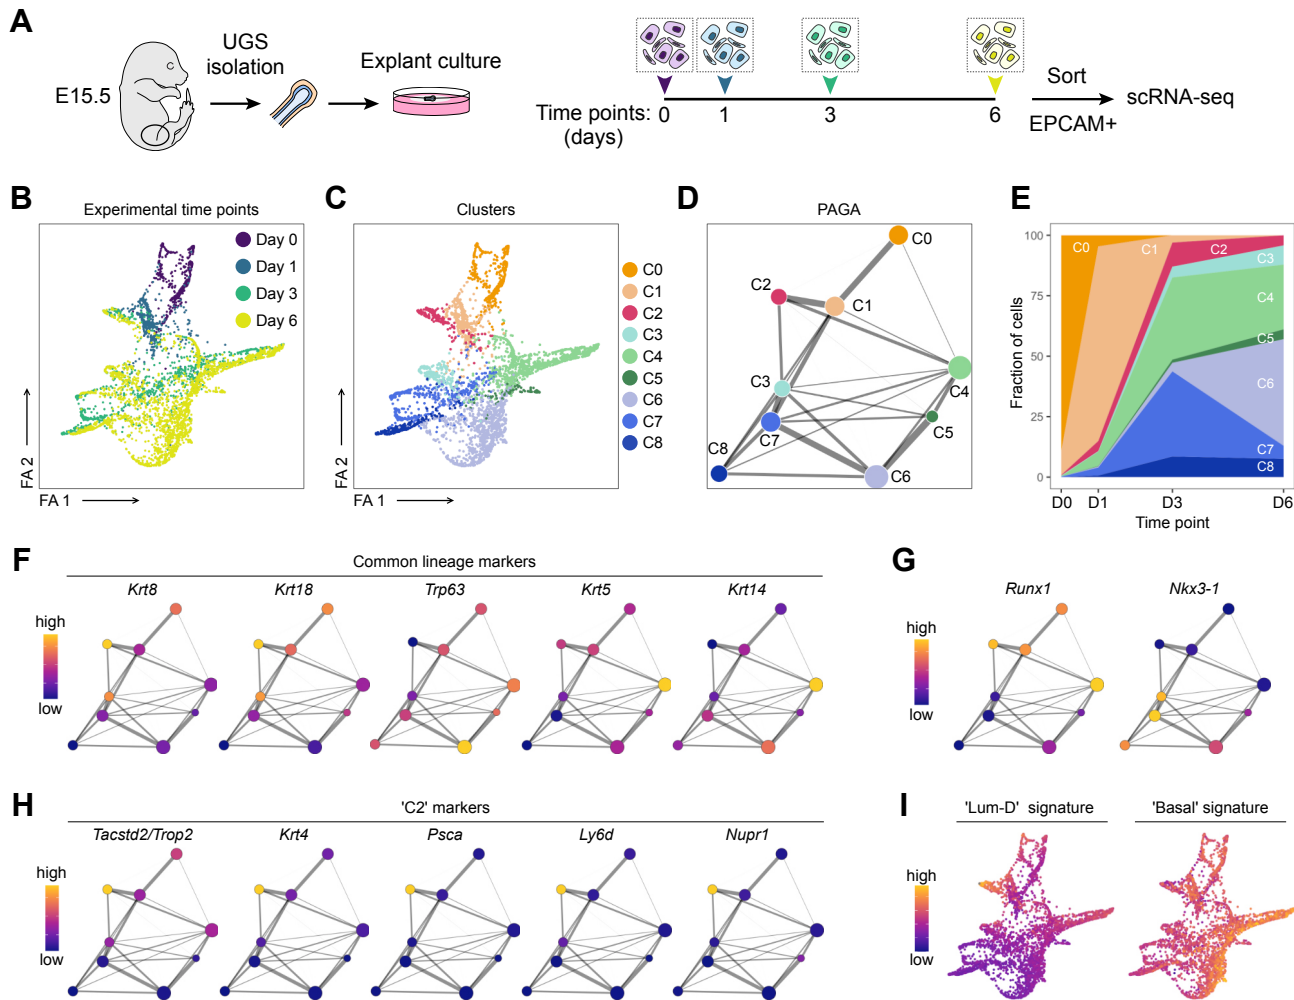

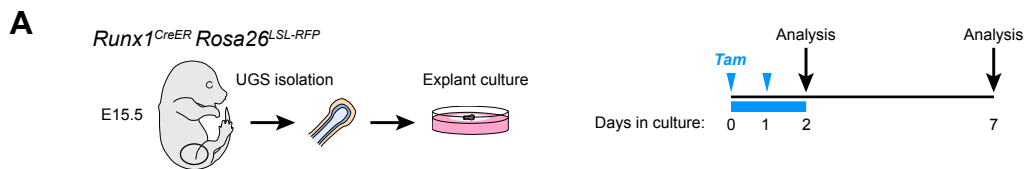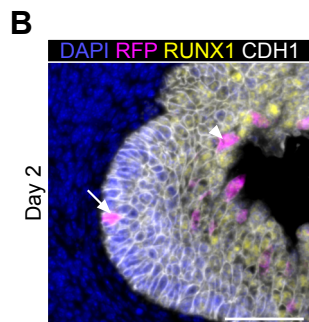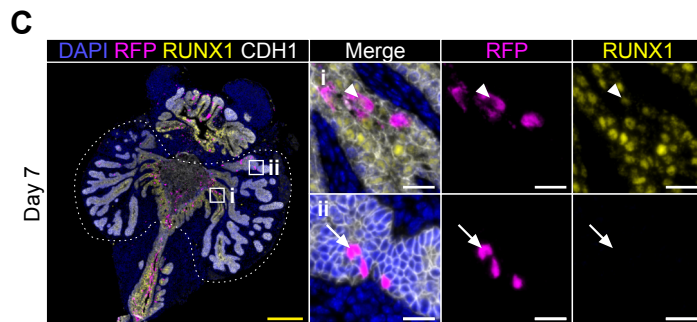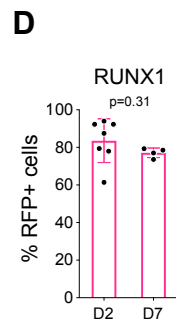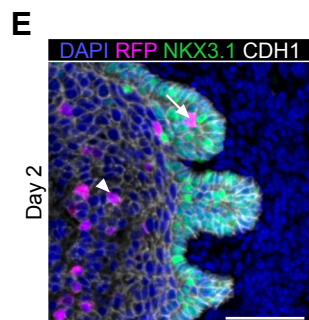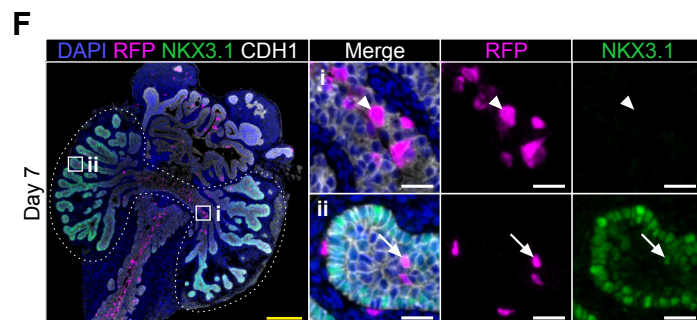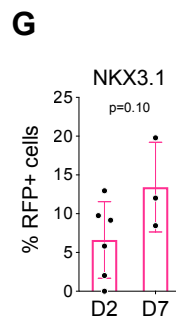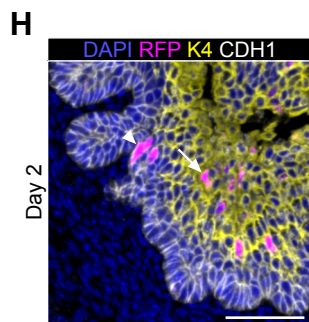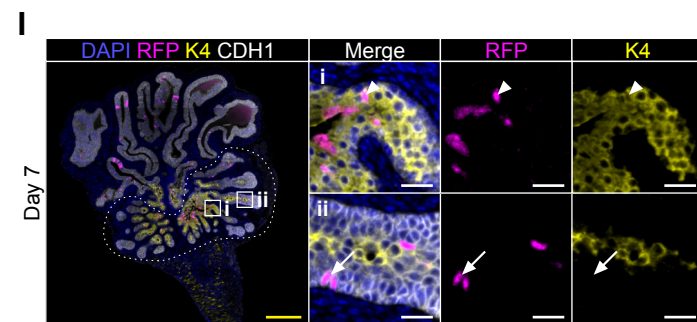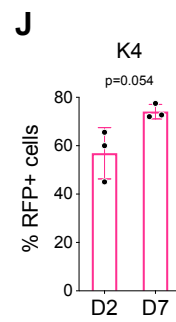



**A**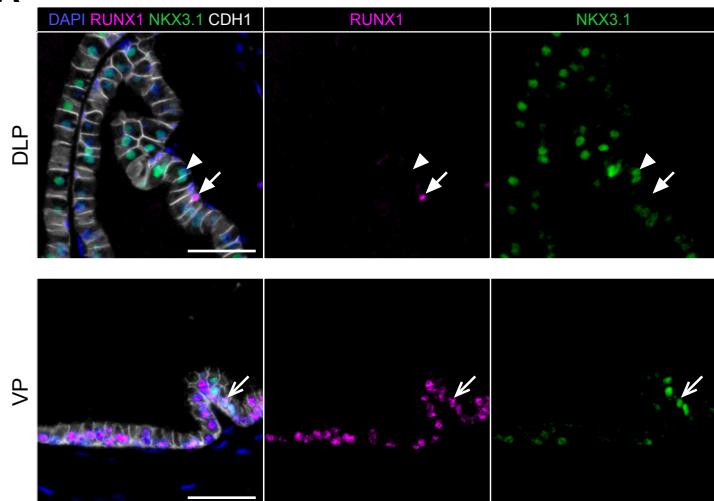**B**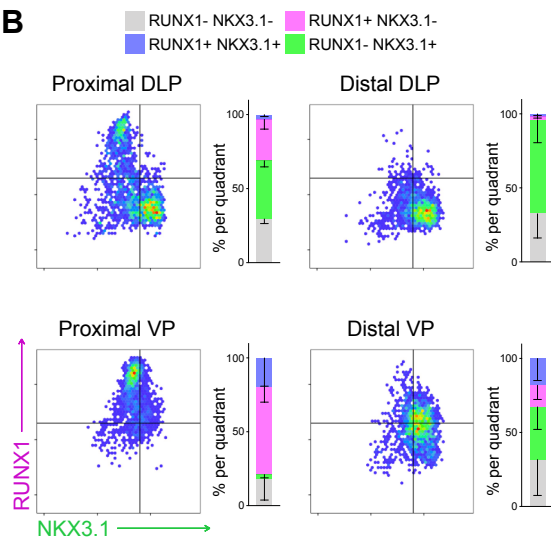**C**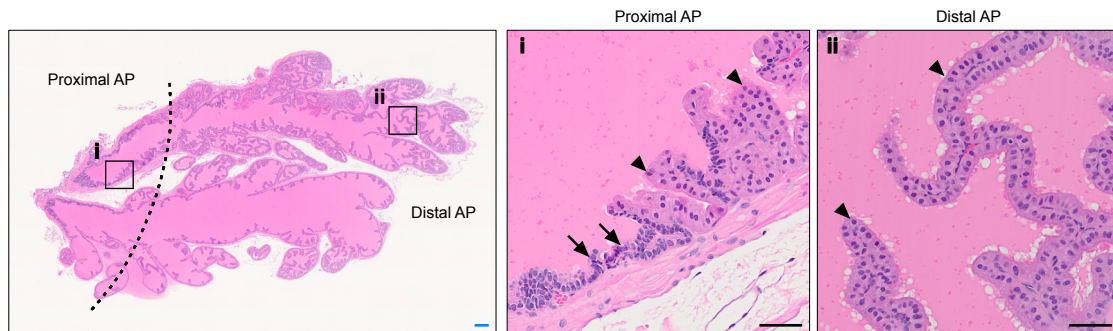

**A**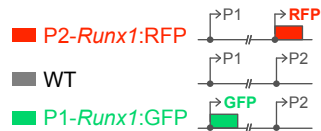**C**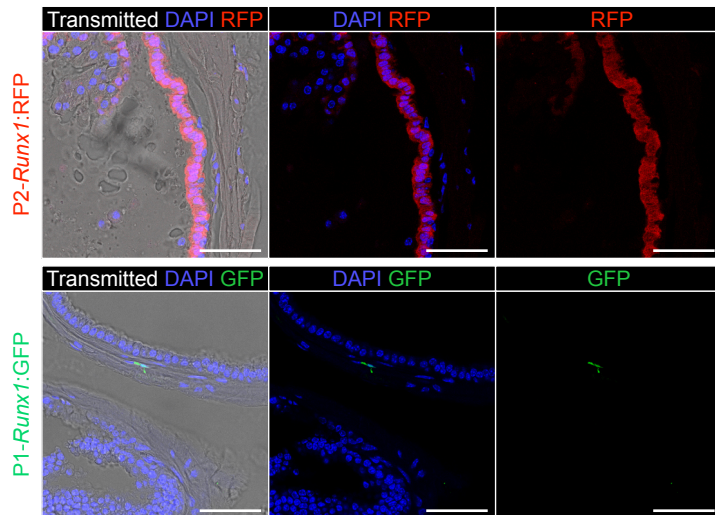**D**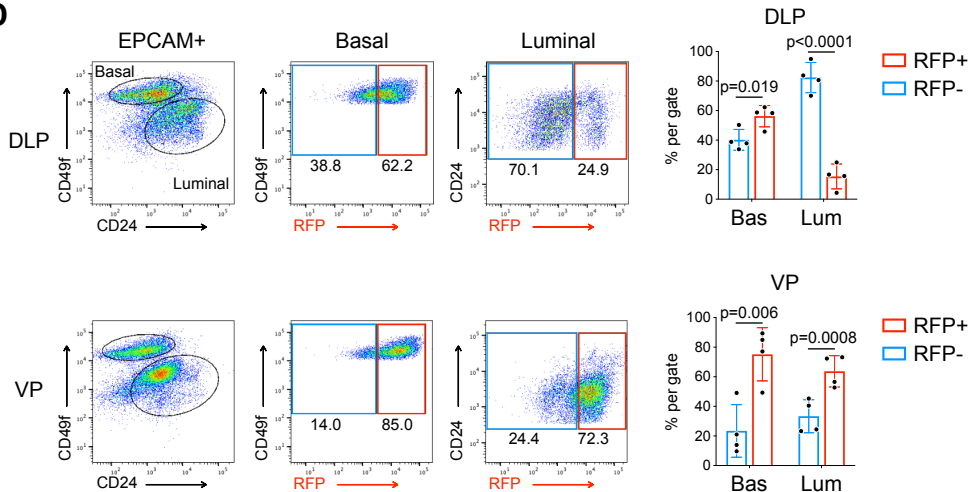

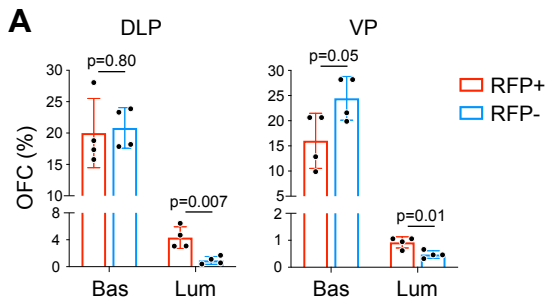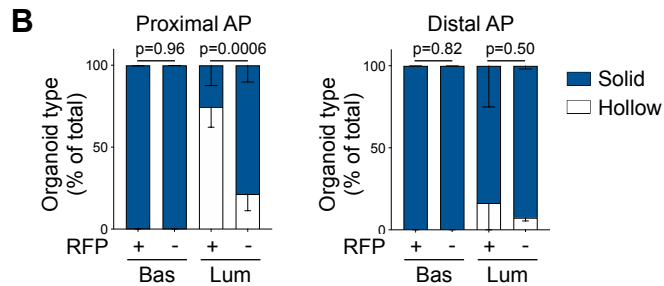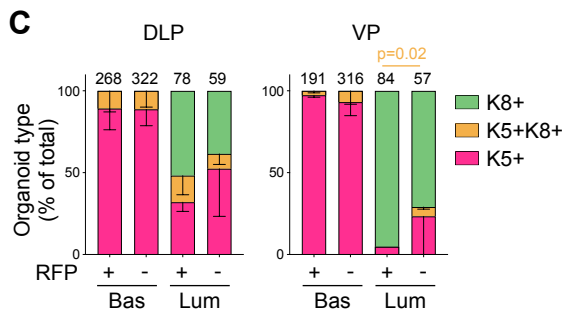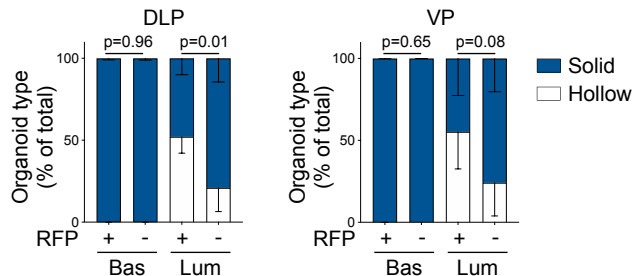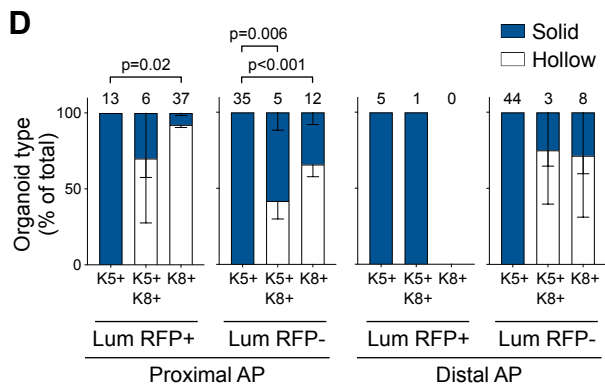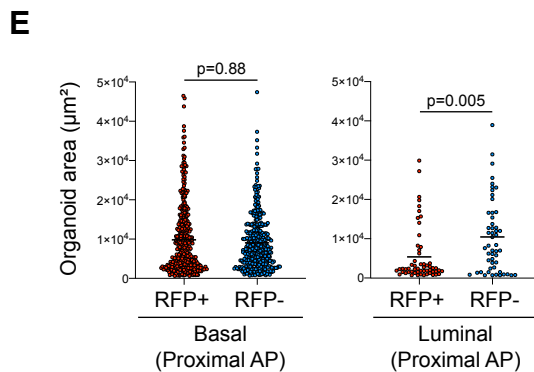

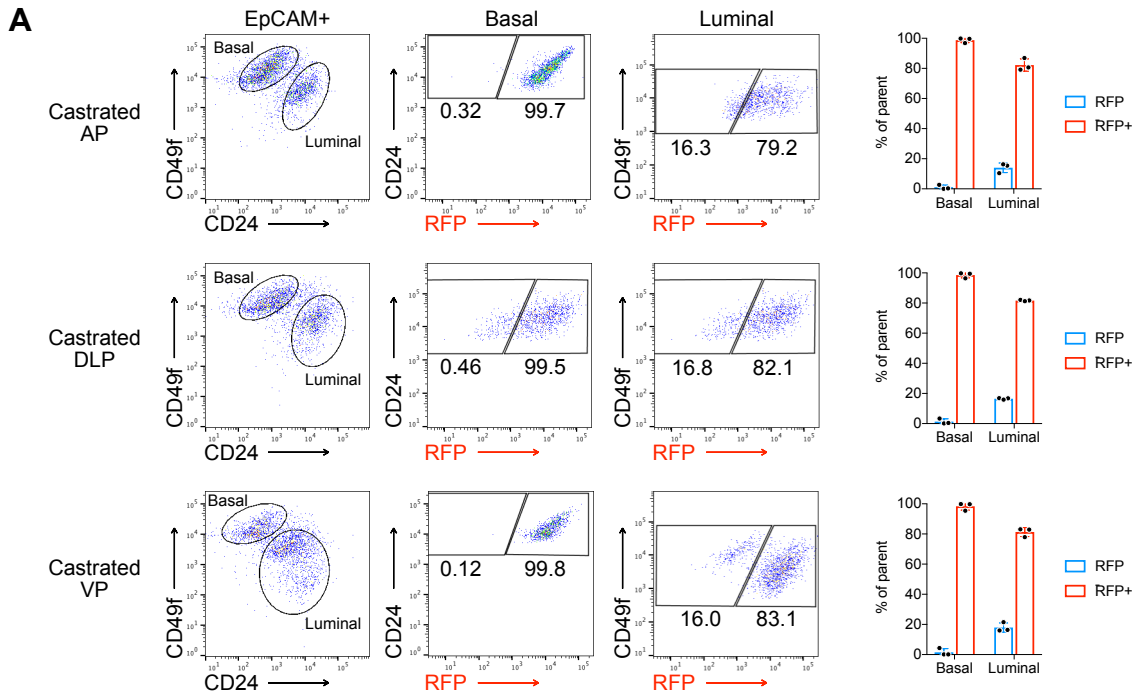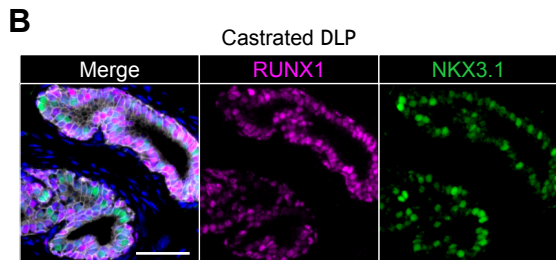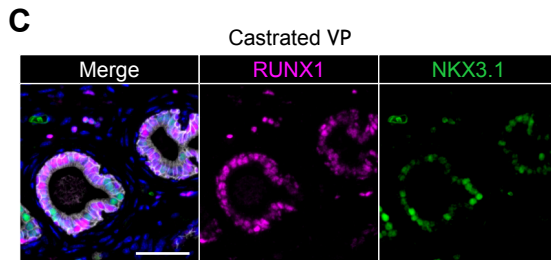



**A**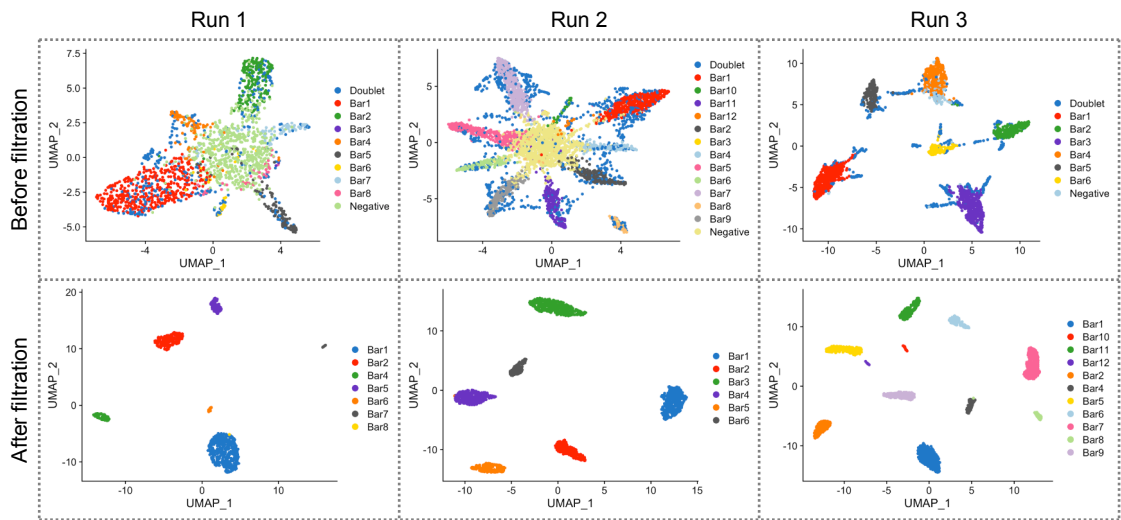**B**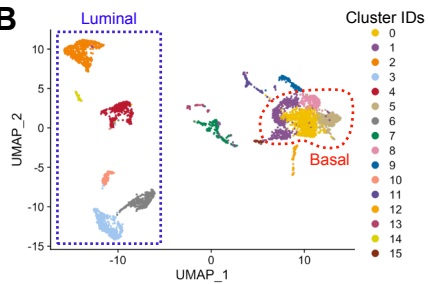**C**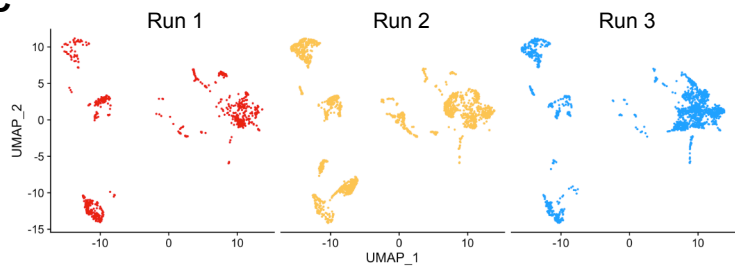**D**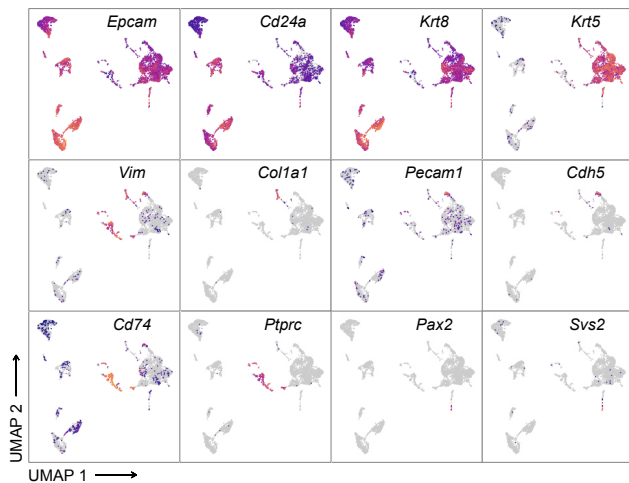**E**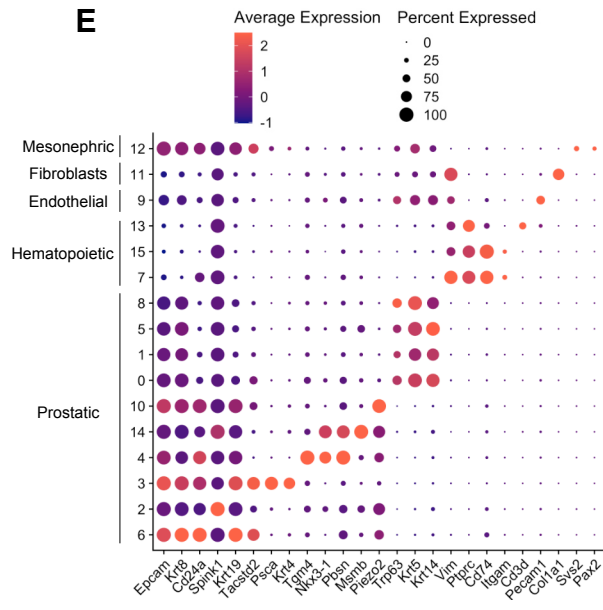

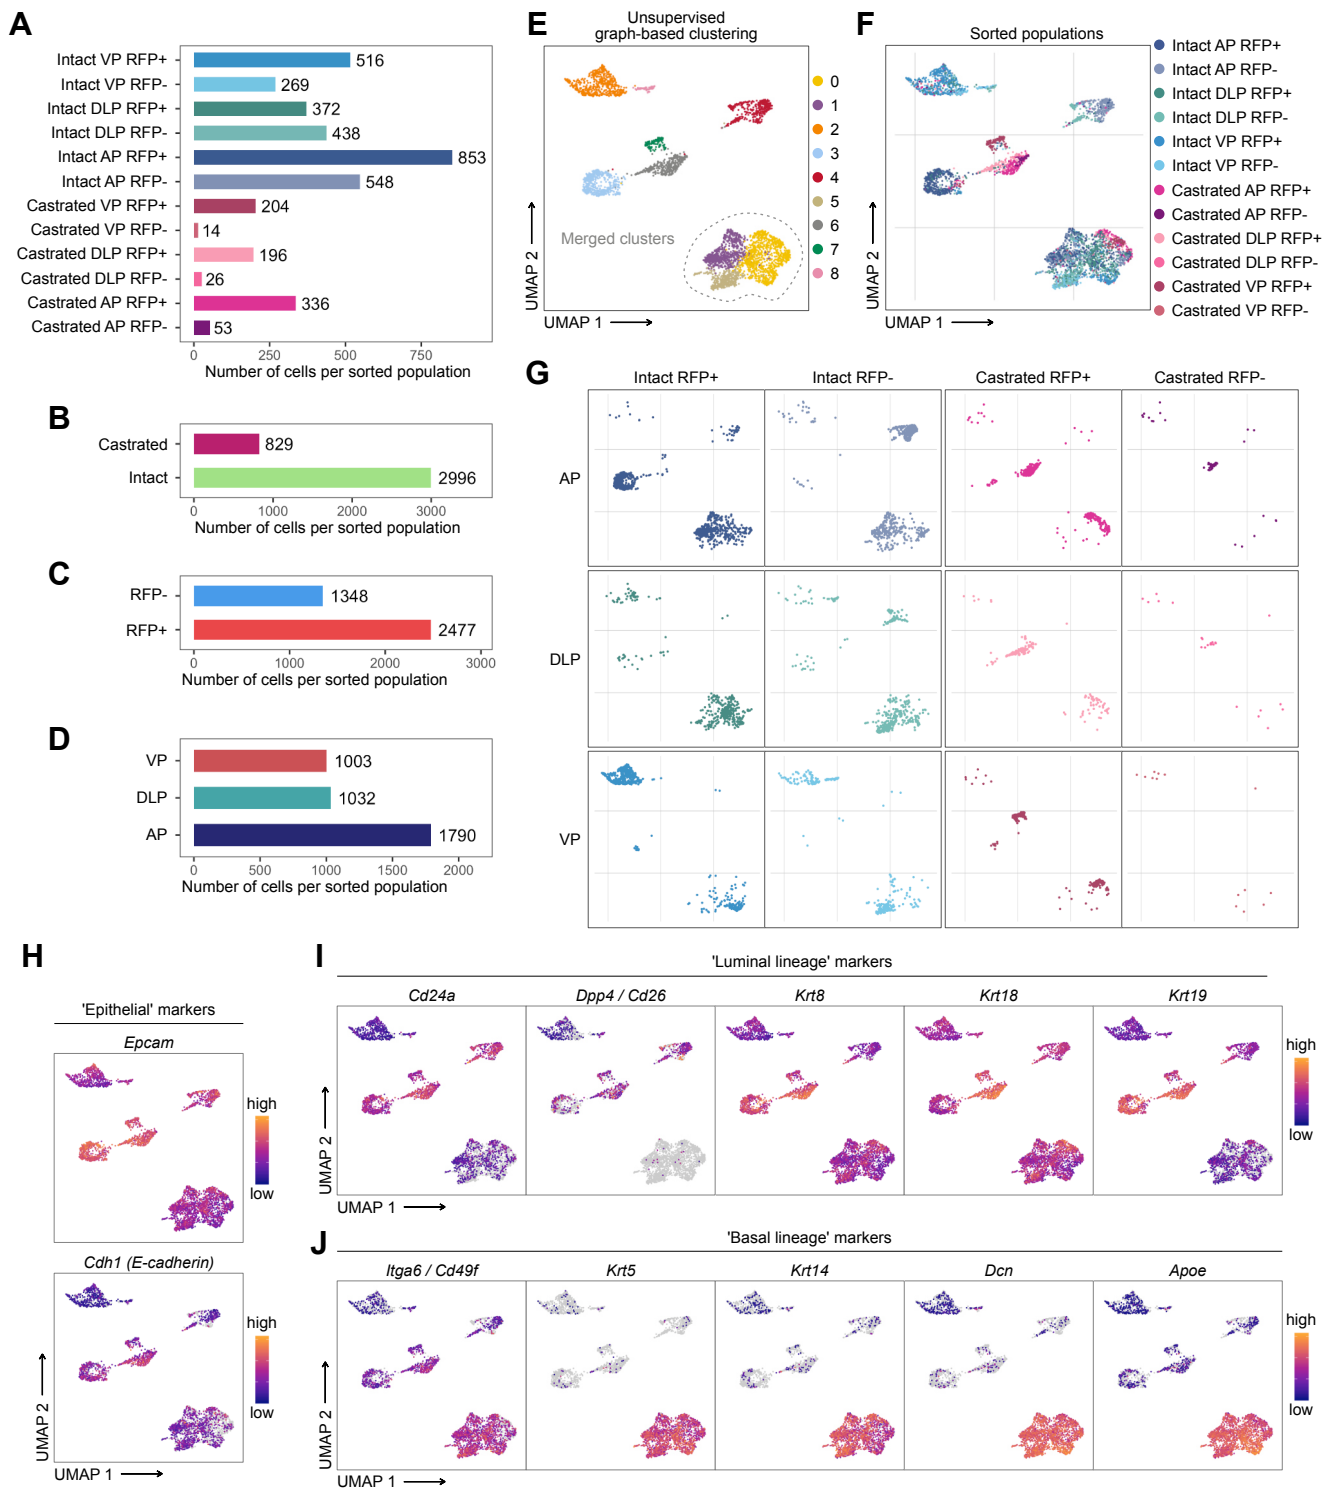

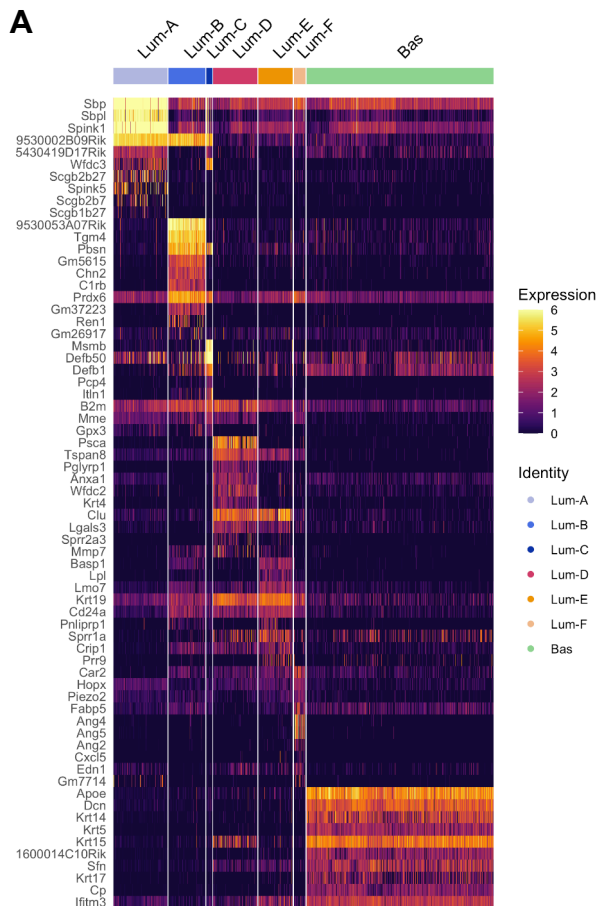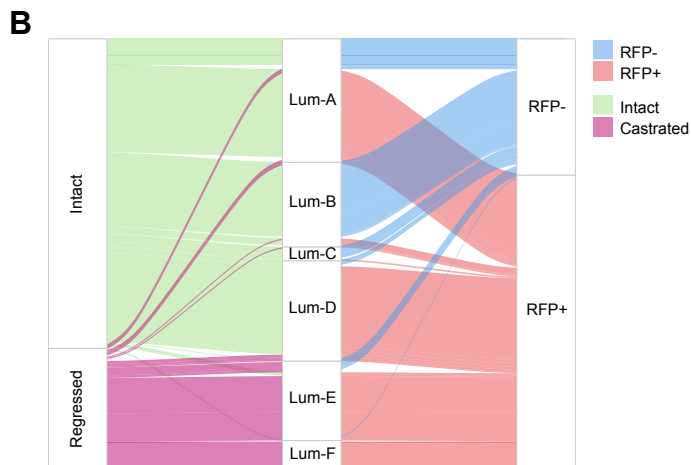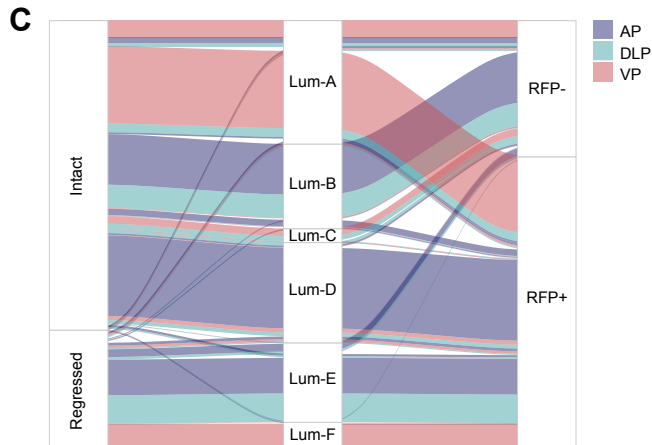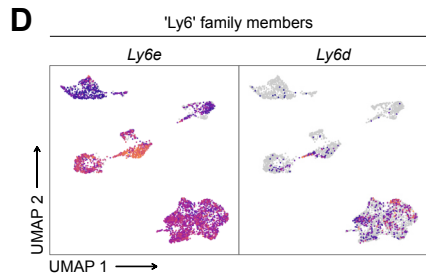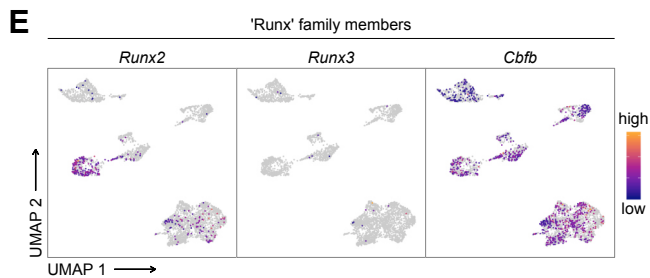

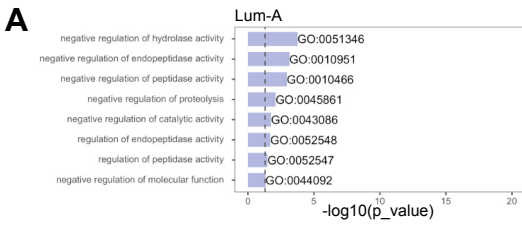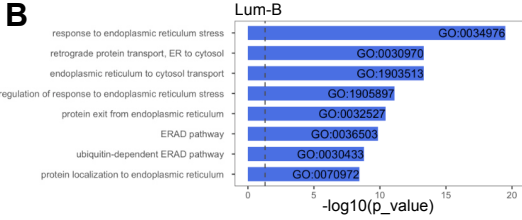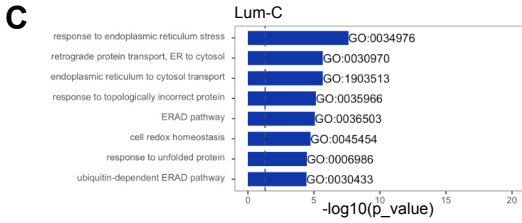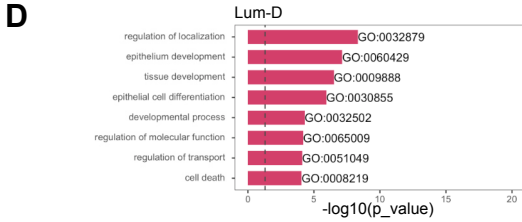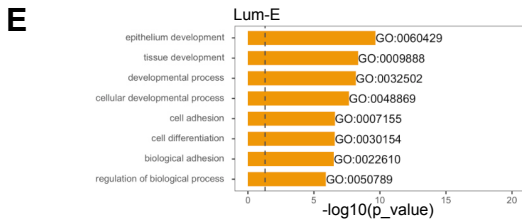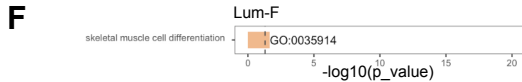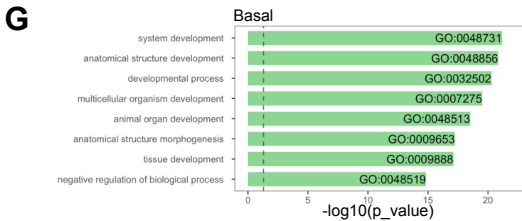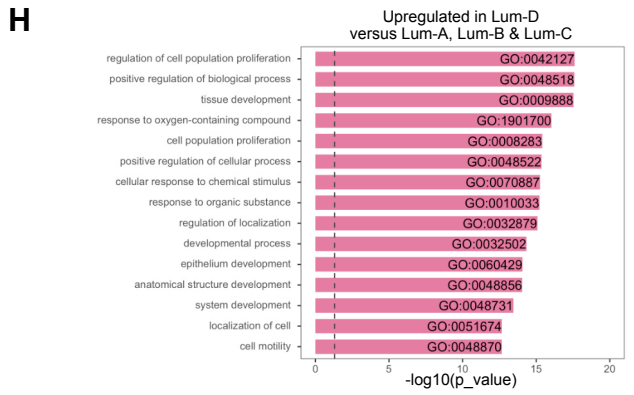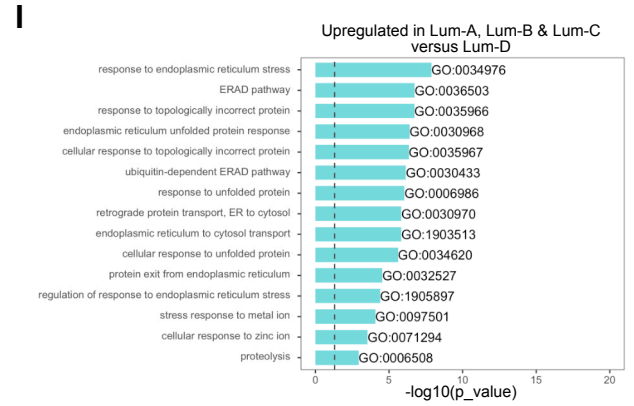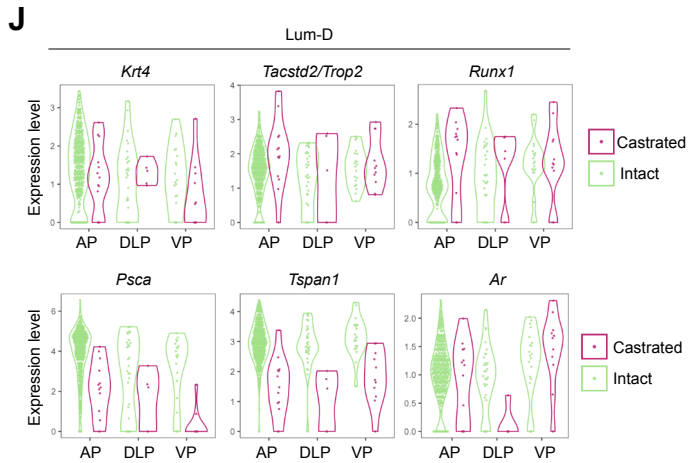

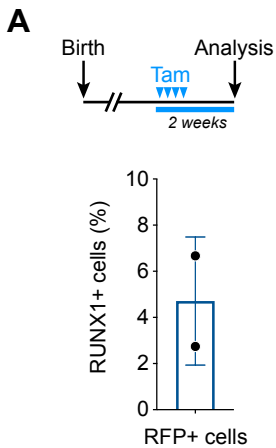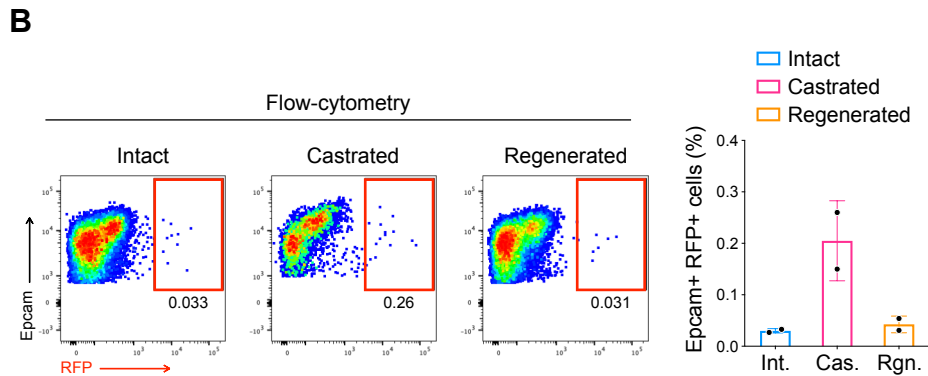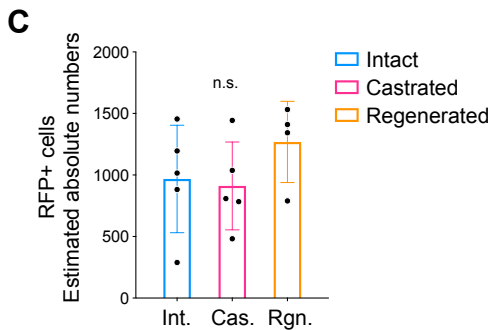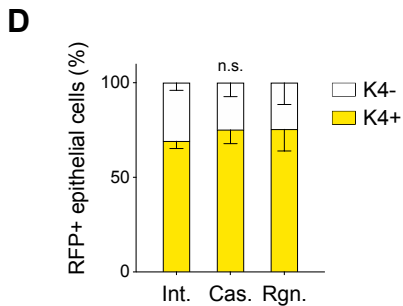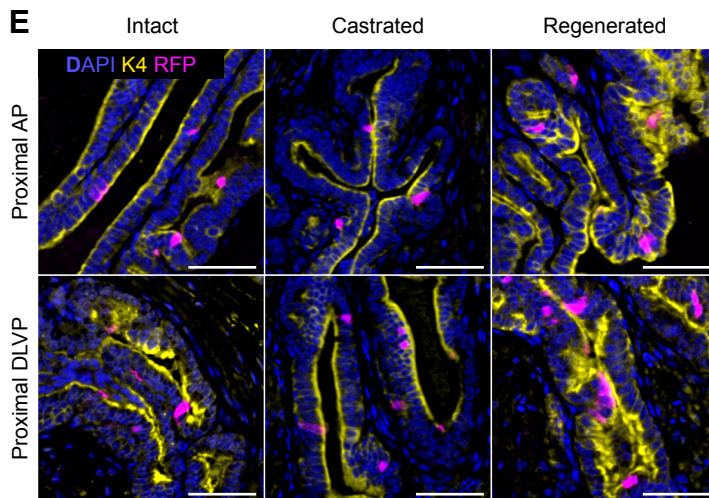

**A**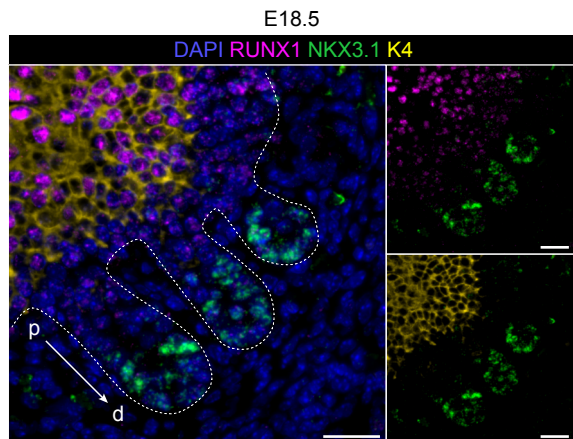**B**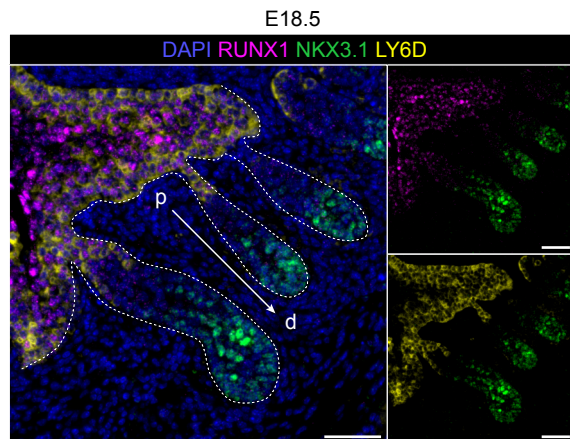**C**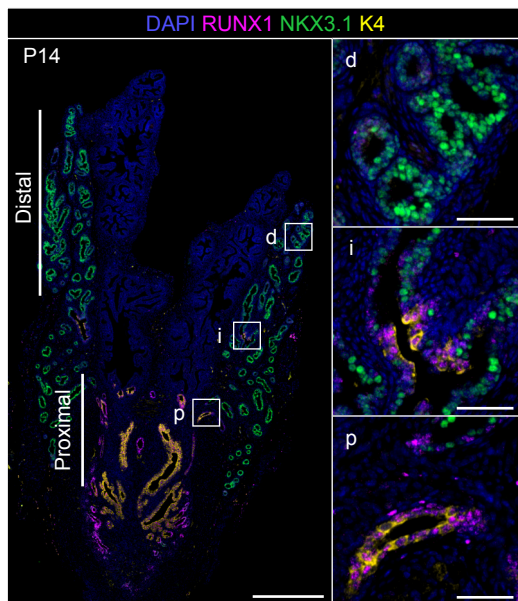**D**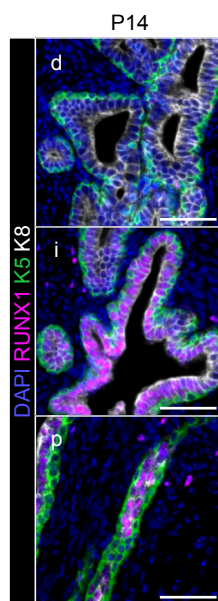**E**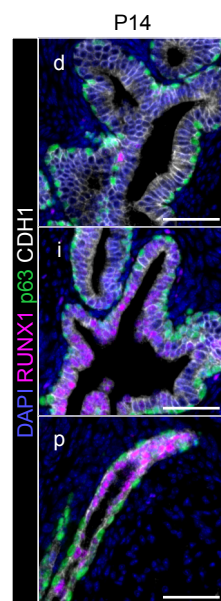



**A**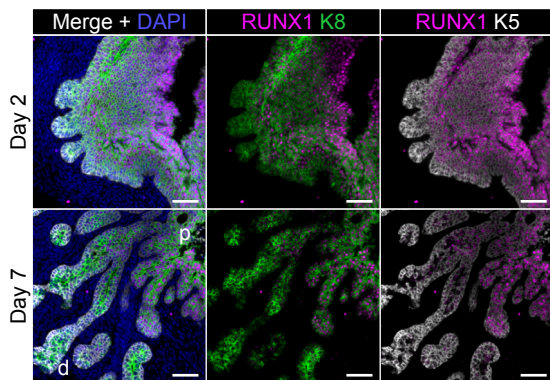**B**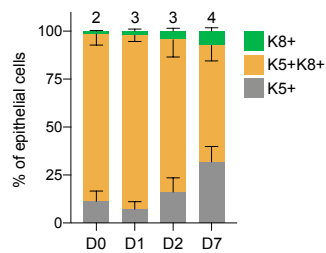**C**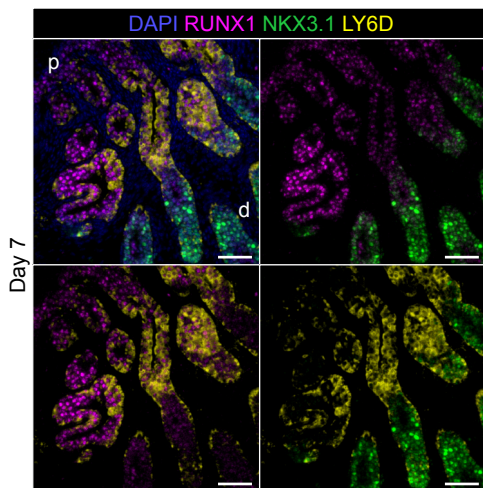**D**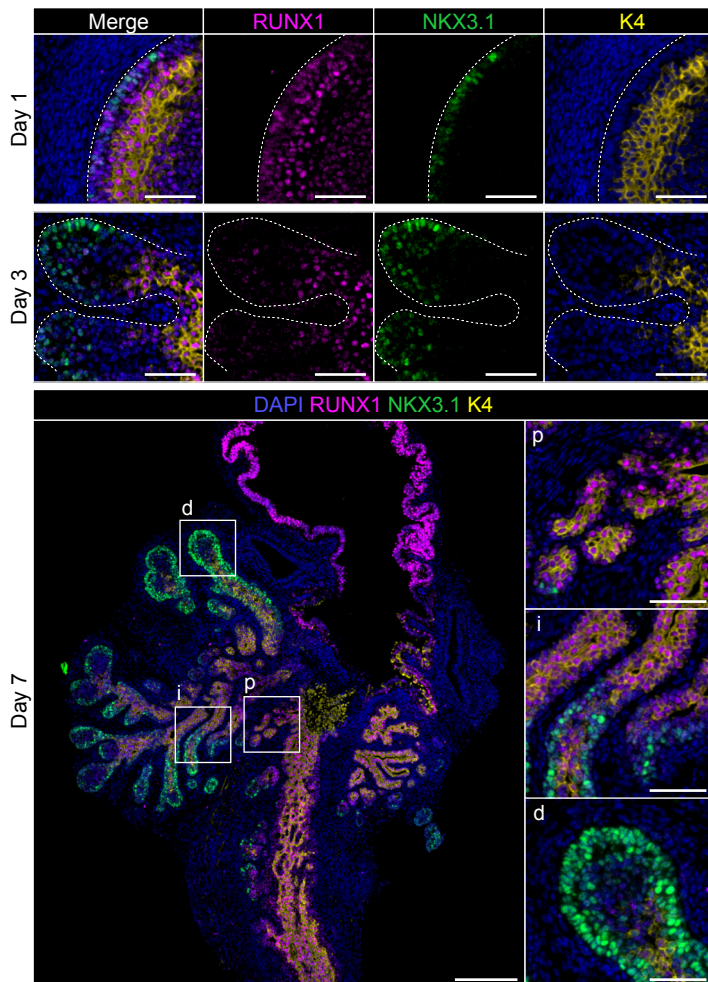**E**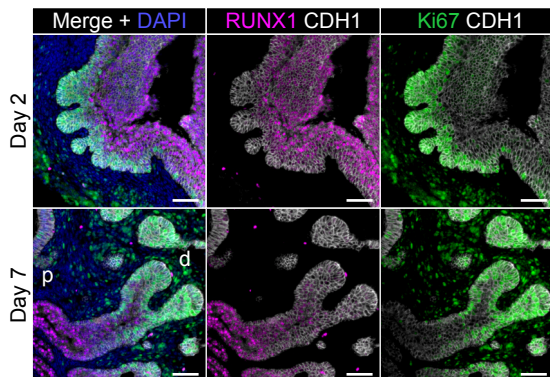

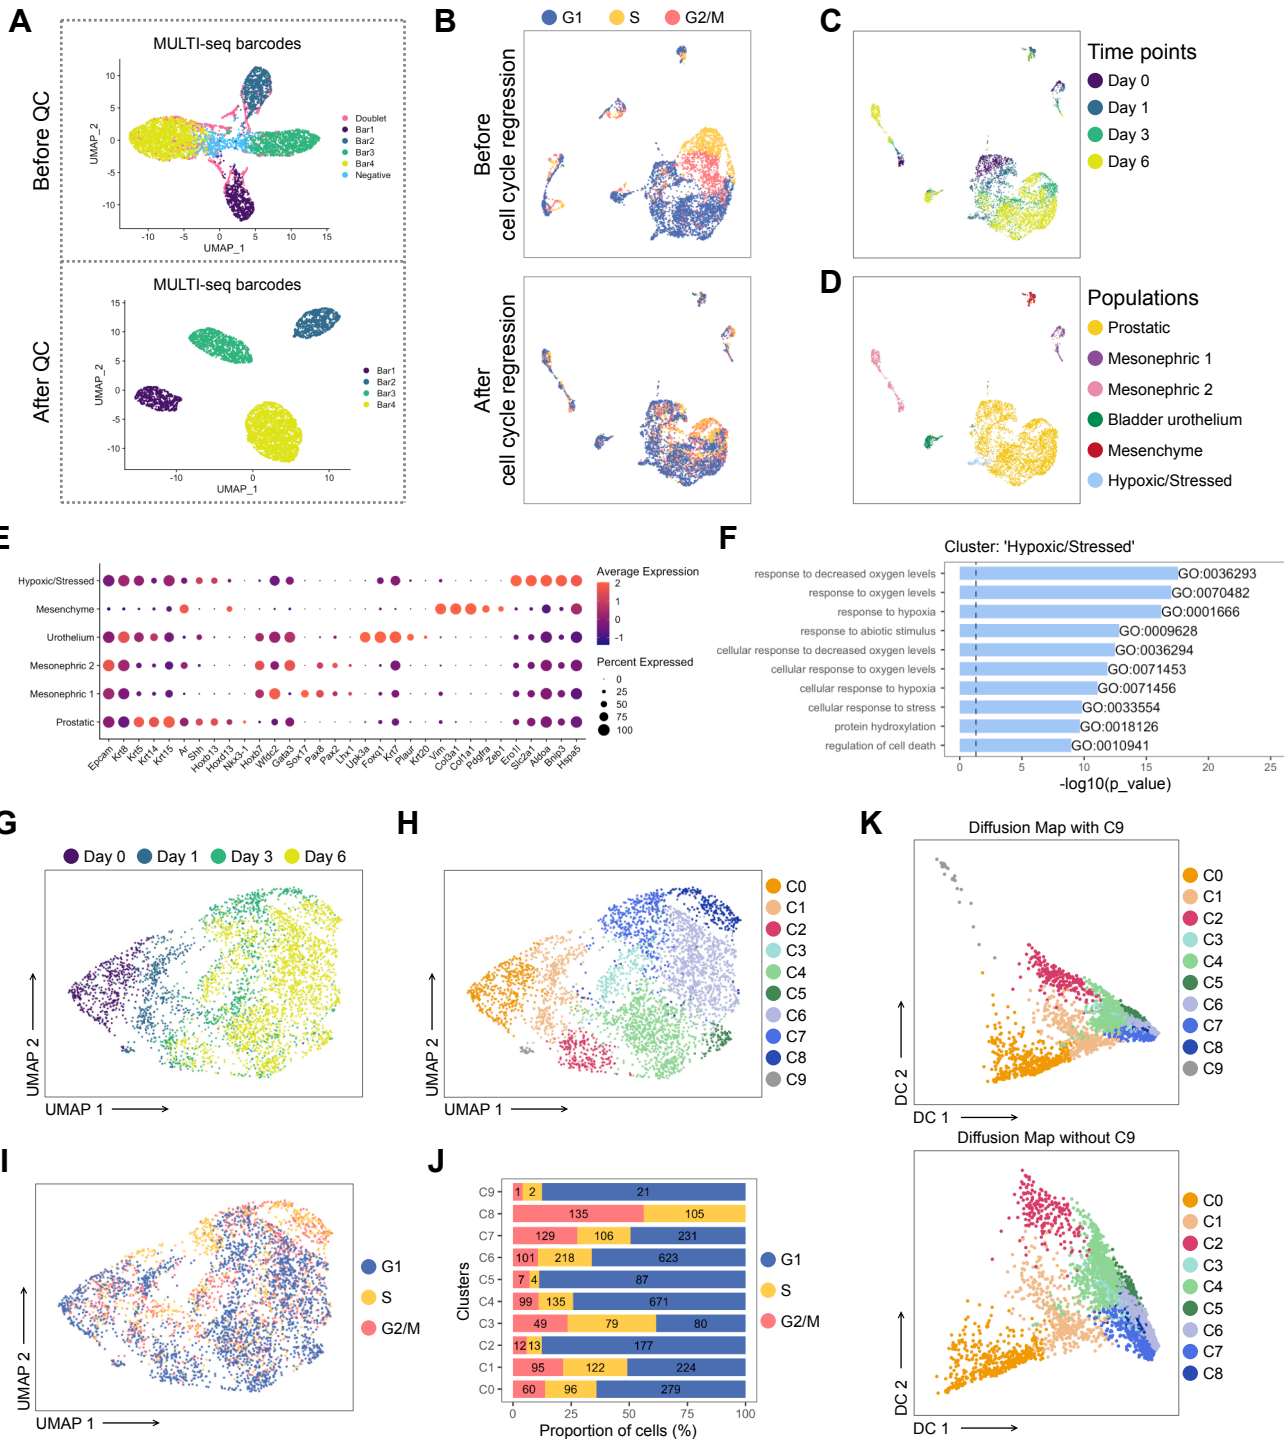



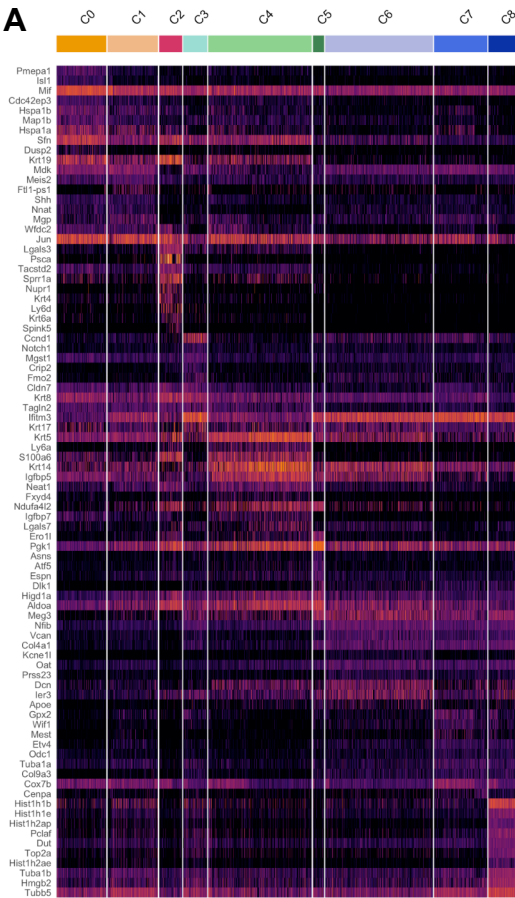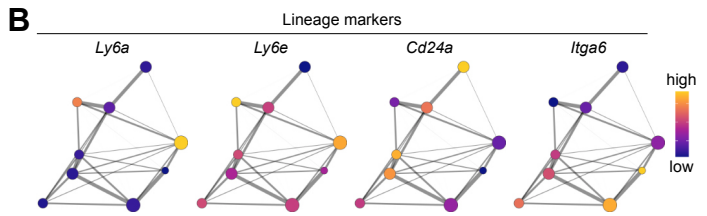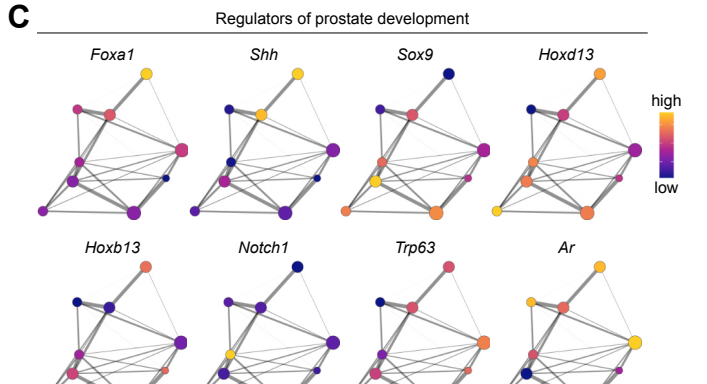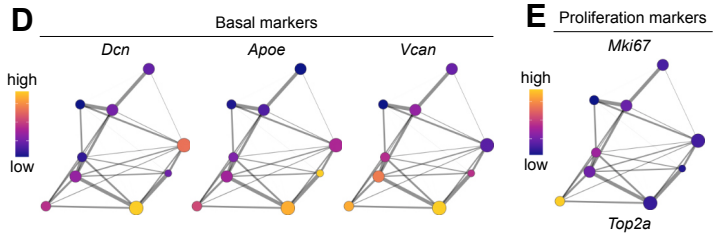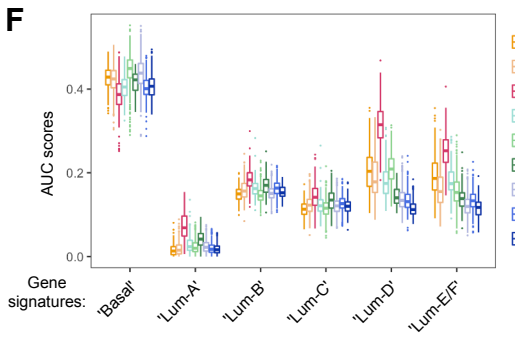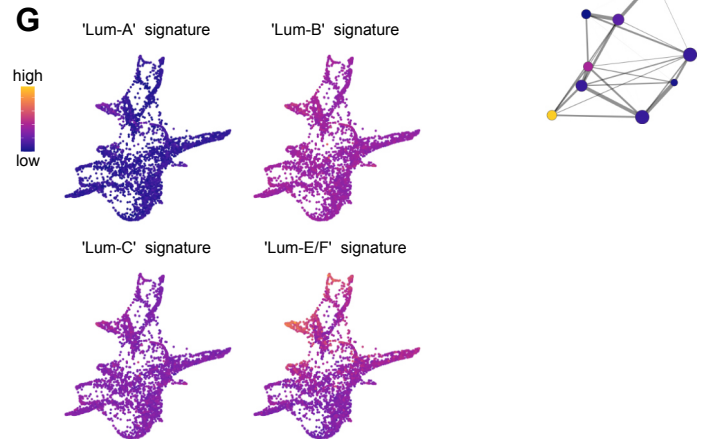

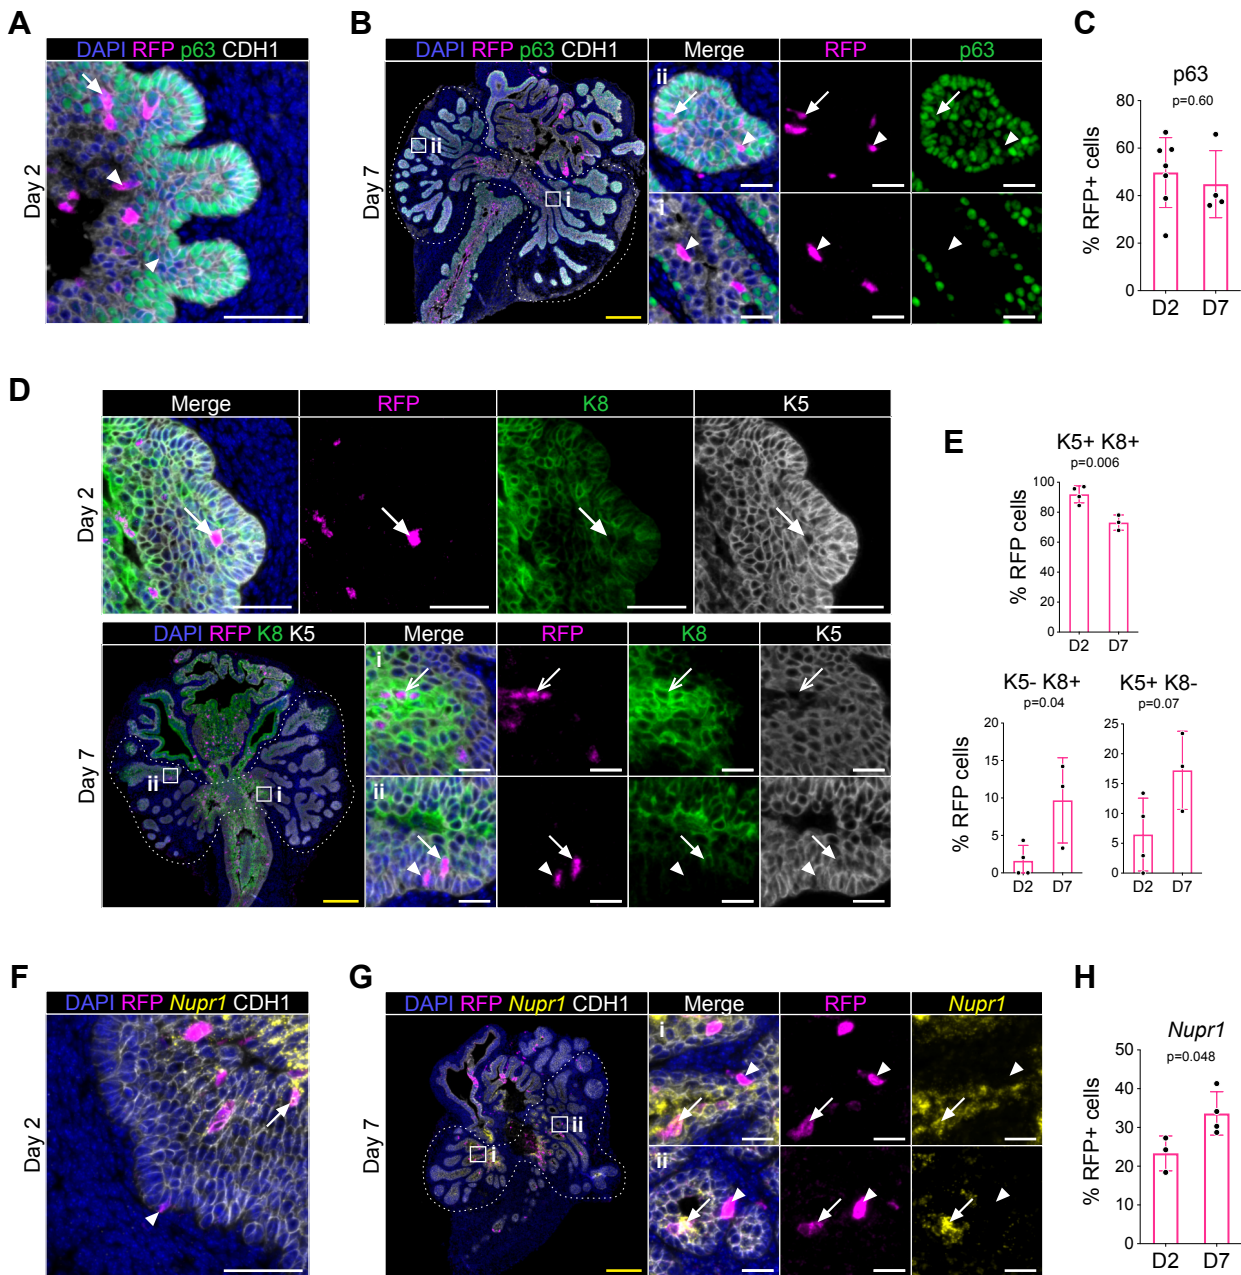

Source: https://www.biorxiv.org/content/10.1101/2020.06.19.161604v4.full.pdf
